# Supplementary material
Source: publisher figshare collection journal article supplement (https://acs.figshare.com/ndownloader/files/7597537)
Supplement: Supplementary file 1 [file 7597537]

 
data_RP2166 
  
_audit_creation_method           SHELXL-2014/7 
_shelx_SHELXL_version_number     2014/7 
_chemical_name_systematic        ? 
_chemical_name_common            ? 
_chemical_formula_moiety         'C24 H29 N3' 
_chemical_formula_sum            'C24 H29 N3' 
_chemical_melting_point          ? 
  
_exptl_crystal_description       parallelepiped 
_exptl_crystal_colour            brown 
_diffrn_ambient_temperature      297(2) 
_chemical_formula_weight         359.50 
  
loop_ 
_atom_type_symbol 
_atom_type_description 
_atom_type_scat_dispersion_real 
_atom_type_scat_dispersion_imag 
_atom_type_scat_source 
C C 0.0033 0.0016 'International Tables Vol C Tables 4.2.6.8 and 6.1.1.4' 
H H 0.0000 0.0000 'International Tables Vol C Tables 4.2.6.8 and 6.1.1.4' 
N N 0.0061 0.0033 'International Tables Vol C Tables 4.2.6.8 and 6.1.1.4' 
  
_space_group_crystal_system      triclinic 
_space_group_IT_number           2 
_space_group_name_H-M_alt        'P -1' 
_space_group_name_Hall           '-P 1' 
  
_shelx_space_group_comment 
; 
The symmetry employed for this shelxl refinement is uniquely defined 
by the following loop, which should always be used as a source of 
symmetry information in preference to the above space-group names. 
They are only intended as comments. 
; 
  
loop_ 
_space_group_symop_operation_xyz 
'x, y, z' 
'-x, -y, -z' 
  
_cell_length_a                   10.2983(9) 
_cell_length_b                   10.3586(9) 
_cell_length_c                   10.9392(10) 
_cell_angle_alpha                89.722(7) 
_cell_angle_beta                 67.730(8) 
_cell_angle_gamma                85.303(7) 
_cell_volume                     1075.84(17) 
_cell_formula_units_Z            2 
_cell_measurement_temperature    297(2) 
_cell_measurement_reflns_used    1529 
_cell_measurement_theta_min      2.8532 
_cell_measurement_theta_max      29.2782 
_exptl_crystal_density_meas      ? 
_exptl_crystal_density_method    ? 
_exptl_crystal_density_diffrn    1.110 
_exptl_crystal_F_000             388 
_exptl_transmission_factor_min   ? 
_exptl_transmission_factor_max   ? 
_exptl_crystal_size_max          0.60 
_exptl_crystal_size_mid          0.26 
_exptl_crystal_size_min          0.23 
_exptl_absorpt_coefficient_mu    0.066 
_shelx_estimated_absorpt_T_min   ? 
_shelx_estimated_absorpt_T_max   ? 
_exptl_absorpt_correction_type   multi-scan 
_exptl_absorpt_correction_T_min  0.97725 
_exptl_absorpt_correction_T_max  1.00000 
_exptl_absorpt_process_details 
; 
CrysAlisPro, Agilent Technologies, 
Version 1.171.35.21 (release 20-01-2012 CrysAlis171 .NET) 
(compiled Jan 23 2012,18:06:46) 
Empirical absorption correction using spherical harmonics, 
 implemented in SCALE3 ABSPACK scaling algorithm. 
; 
_exptl_absorpt_special_details   ? 
_diffrn_radiation_probe          x-ray 
_diffrn_radiation_type           MoK\a 
_diffrn_radiation_wavelength     0.71073 
_diffrn_source                   ? 
_diffrn_measurement_device_type  'CCD detector' 
_diffrn_measurement_method       '\w scans' 
_diffrn_detector_area_resol_mean ? 
_diffrn_reflns_number            8096 
_diffrn_reflns_av_unetI/netI     0.0586 
_diffrn_reflns_av_R_equivalents  0.0240 
_diffrn_reflns_limit_h_min       -13 
_diffrn_reflns_limit_h_max       12 
_diffrn_reflns_limit_k_min       -14 
_diffrn_reflns_limit_k_max       9 
_diffrn_reflns_limit_l_min       -14 
_diffrn_reflns_limit_l_max       14 
_diffrn_reflns_theta_min         2.859 
_diffrn_reflns_theta_max         29.343 
_diffrn_reflns_theta_full        25.242 
_diffrn_measured_fraction_theta_max 0.838 
_diffrn_measured_fraction_theta_full 0.998 
_diffrn_reflns_Laue_measured_fraction_max 0.838 
_diffrn_reflns_Laue_measured_fraction_full 0.998 
_diffrn_reflns_point_group_measured_fraction_max 0.838 
_diffrn_reflns_point_group_measured_fraction_full 0.998 
_reflns_number_total             4946 
_reflns_number_gt                2870 
_reflns_threshold_expression     'I > 2\s(I)' 
_reflns_Friedel_coverage         0.000 
_reflns_Friedel_fraction_max     . 
_reflns_Friedel_fraction_full    . 
  
_reflns_special_details 
; 
 Reflections were merged by SHELXL according to the crystal 
 class for the calculation of statistics and refinement. 
  
 _reflns_Friedel_fraction is defined as the number of unique 
 Friedel pairs measured divided by the number that would be 
 possible theoretically, ignoring centric projections and 
 systematic absences. 
; 
  
_computing_data_collection 
; 
CrysAlis CCD, Oxford Diffraction Ltd., 
Version 1.171.32.29 (release 10-06-2008 CrysAlis171 .NET) 
(compiled Jun 10 2008,16:49:55) 
; 
_computing_cell_refinement 
; 
CrysAlis RED, Oxford Diffraction Ltd., 
Version 1.171.32.29 (release 10-06-2008 CrysAlis171 .NET) 
(compiled Jun 10 2008,16:49:55) 
; 
_computing_data_reduction 
; 
CrysAlis RED, Oxford Diffraction Ltd., 
Version 1.171.32.29 (release 10-06-2008 CrysAlis171 .NET) 
(compiled Jun 10 2008,16:49:55) 
; 
_computing_structure_solution    'SHELXS-97 (Sheldrick 2008)' 
_computing_structure_refinement  'SHELXL-2014/7 (Sheldrick, 2014)' 
_computing_molecular_graphics    'Bruker SHELXTL' 
_computing_publication_material  'Bruker SHELXTL' 
_refine_special_details          ? 
_refine_ls_structure_factor_coef Fsqd 
_refine_ls_matrix_type           full 
_refine_ls_weighting_scheme      calc 
_refine_ls_weighting_details 
'w=1/[\s^2^(Fo^2^)+(0.0610P)^2^+0.0972P] where P=(Fo^2^+2Fc^2^)/3' 
_atom_sites_solution_primary     ? 
_atom_sites_solution_secondary   ? 
_atom_sites_solution_hydrogens   mixed 
_refine_ls_hydrogen_treatment    mixed 
_refine_ls_extinction_method     none 
_refine_ls_extinction_coef       . 
_refine_ls_number_reflns         4946 
_refine_ls_number_parameters     248 
_refine_ls_number_restraints     0 
_refine_ls_R_factor_all          0.1173 
_refine_ls_R_factor_gt           0.0619 
_refine_ls_wR_factor_ref         0.1574 
_refine_ls_wR_factor_gt          0.1276 
_refine_ls_goodness_of_fit_ref   1.016 
_refine_ls_restrained_S_all      1.016 
_refine_ls_shift/su_max          0.001 
_refine_ls_shift/su_mean         0.000 
  
loop_ 
_atom_site_label 
_atom_site_type_symbol 
_atom_site_fract_x 
_atom_site_fract_y 
_atom_site_fract_z 
_atom_site_U_iso_or_equiv 
_atom_site_adp_type 
_atom_site_occupancy 
_atom_site_site_symmetry_order 
_atom_site_calc_flag 
_atom_site_refinement_flags_posn 
_atom_site_refinement_flags_adp 
_atom_site_refinement_flags_occupancy 
_atom_site_disorder_assembly 
_atom_site_disorder_group 
N1 N 0.82397(16) 0.58914(14) 0.24712(15) 0.0450(4) Uani 1 1 d . . . . . 
N2 N 1.13417(18) 0.64821(18) 0.30315(18) 0.0532(5) Uani 1 1 d . . . . . 
H2A H 1.107(3) 0.730(3) 0.324(3) 0.092(9) Uiso 1 1 d . . . . . 
N3 N 0.89124(16) 0.78375(15) 0.32214(15) 0.0446(4) Uani 1 1 d . . . . . 
C1 C 0.89816(19) 0.47346(18) 0.21124(18) 0.0410(5) Uani 1 1 d . . . . . 
C2 C 1.03569(19) 0.46336(17) 0.22020(18) 0.0401(5) Uani 1 1 d . . . . . 
C3 C 1.04704(19) 0.58559(18) 0.26672(18) 0.0418(5) Uani 1 1 d . . . . . 
C4 C 0.91031(19) 0.66458(18) 0.28139(18) 0.0404(5) Uani 1 1 d . . . . . 
C5 C 0.8345(2) 0.37008(17) 0.16659(18) 0.0412(5) Uani 1 1 d . . . . . 
C6 C 0.6899(2) 0.3611(2) 0.2271(2) 0.0548(6) Uani 1 1 d . . . . . 
H6A H 0.6361 0.4181 0.2965 0.066 Uiso 1 1 calc R U . . . 
C7 C 0.6259(2) 0.2690(2) 0.1854(2) 0.0614(6) Uani 1 1 d . . . . . 
H7A H 0.5294 0.2637 0.2273 0.074 Uiso 1 1 calc R U . . . 
C8 C 0.7038(3) 0.1848(2) 0.0822(2) 0.0591(6) Uani 1 1 d . . . . . 
H8A H 0.6602 0.1225 0.0543 0.071 Uiso 1 1 calc R U . . . 
C9 C 0.8463(3) 0.1930(2) 0.0205(2) 0.0591(6) Uani 1 1 d . . . . . 
H9A H 0.8989 0.1371 -0.0504 0.071 Uiso 1 1 calc R U . . . 
C10 C 0.9117(2) 0.2839(2) 0.06299(19) 0.0523(5) Uani 1 1 d . . . . . 
H10A H 1.0086 0.2873 0.0218 0.063 Uiso 1 1 calc R U . . . 
C11 C 1.12728(19) 0.33990(18) 0.19804(18) 0.0419(5) Uani 1 1 d . . . . . 
C12 C 1.0931(2) 0.2445(2) 0.2912(2) 0.0611(6) Uani 1 1 d . . . . . 
H12A H 1.0139 0.2596 0.3687 0.073 Uiso 1 1 calc R U . . . 
C13 C 1.1738(3) 0.1273(2) 0.2720(3) 0.0777(8) Uani 1 1 d . . . . . 
H13A H 1.1475 0.0638 0.3351 0.093 Uiso 1 1 calc R U . . . 
C14 C 1.2933(3) 0.1048(2) 0.1587(3) 0.0751(8) Uani 1 1 d . . . . . 
H14A H 1.3496 0.0272 0.1463 0.090 Uiso 1 1 calc R U . . . 
C15 C 1.3281(3) 0.1971(2) 0.0653(3) 0.0687(7) Uani 1 1 d . . . . . 
H15A H 1.4081 0.1818 -0.0115 0.082 Uiso 1 1 calc R U . . . 
C16 C 1.2461(2) 0.3131(2) 0.0833(2) 0.0545(6) Uani 1 1 d . . . . . 
H16A H 1.2706 0.3743 0.0176 0.065 Uiso 1 1 calc R U . . . 
C17 C 1.2735(2) 0.61005(19) 0.3071(2) 0.0474(5) Uani 1 1 d . . . . . 
C18 C 1.2665(3) 0.4947(2) 0.3949(2) 0.0710(7) Uani 1 1 d . . . . . 
H18A H 1.3581 0.4713 0.3962 0.107 Uiso 1 1 calc R U . . . 
H18B H 1.2011 0.5171 0.4830 0.107 Uiso 1 1 calc R U . . . 
H18C H 1.2359 0.4228 0.3610 0.107 Uiso 1 1 calc R U . . . 
C19 C 1.3828(2) 0.5818(3) 0.1688(2) 0.0731(7) Uani 1 1 d . . . . . 
H19A H 1.4726 0.5571 0.1736 0.110 Uiso 1 1 calc R U . . . 
H19B H 1.3557 0.5124 0.1282 0.110 Uiso 1 1 calc R U . . . 
H19C H 1.3892 0.6579 0.1172 0.110 Uiso 1 1 calc R U . . . 
C20 C 1.3114(3) 0.7265(2) 0.3673(3) 0.0860(9) Uani 1 1 d . . . . . 
H20A H 1.4019 0.7073 0.3724 0.129 Uiso 1 1 calc R U . . . 
H20B H 1.3143 0.8002 0.3130 0.129 Uiso 1 1 calc R U . . . 
H20C H 1.2417 0.7454 0.4544 0.129 Uiso 1 1 calc R U . . . 
C21 C 0.7598(2) 0.86760(18) 0.34603(19) 0.0462(5) Uani 1 1 d . . . . . 
C22 C 0.7922(3) 1.0040(2) 0.3706(3) 0.0699(7) Uani 1 1 d . . . . . 
H22A H 0.7103 1.0631 0.3868 0.105 Uiso 1 1 calc R U . . . 
H22B H 0.8183 1.0046 0.4460 0.105 Uiso 1 1 calc R U . . . 
H22C H 0.8685 1.0301 0.2944 0.105 Uiso 1 1 calc R U . . . 
C23 C 0.6438(2) 0.8200(2) 0.4683(2) 0.0708(7) Uani 1 1 d . . . . . 
H23A H 0.5576 0.8732 0.4854 0.106 Uiso 1 1 calc R U . . . 
H23B H 0.6303 0.7317 0.4532 0.106 Uiso 1 1 calc R U . . . 
H23C H 0.6706 0.8251 0.5430 0.106 Uiso 1 1 calc R U . . . 
C24 C 0.7165(3) 0.8678(2) 0.2280(2) 0.0653(6) Uani 1 1 d . . . . . 
H24A H 0.6312 0.9231 0.2475 0.098 Uiso 1 1 calc R U . . . 
H24B H 0.7898 0.8992 0.1526 0.098 Uiso 1 1 calc R U . . . 
H24C H 0.7011 0.7812 0.2091 0.098 Uiso 1 1 calc R U . . . 
  
loop_ 
_atom_site_aniso_label 
_atom_site_aniso_U_11 
_atom_site_aniso_U_22 
_atom_site_aniso_U_33 
_atom_site_aniso_U_23 
_atom_site_aniso_U_13 
_atom_site_aniso_U_12 
N1 0.0416(9) 0.0384(9) 0.0557(10) -0.0049(8) -0.0205(8) 0.0023(8) 
N2 0.0427(10) 0.0436(10) 0.0757(12) -0.0103(9) -0.0268(9) 0.0049(9) 
N3 0.0401(9) 0.0380(9) 0.0545(10) -0.0048(8) -0.0180(7) 0.0042(7) 
C1 0.0405(11) 0.0402(11) 0.0408(10) 0.0008(8) -0.0140(8) -0.0023(9) 
C2 0.0364(10) 0.0388(10) 0.0437(10) -0.0014(9) -0.0144(8) 0.0005(8) 
C3 0.0375(10) 0.0412(11) 0.0447(10) 0.0011(9) -0.0142(9) 0.0003(9) 
C4 0.0368(10) 0.0394(11) 0.0431(10) 0.0011(9) -0.0139(8) 0.0014(9) 
C5 0.0448(11) 0.0364(10) 0.0457(10) 0.0019(9) -0.0214(9) -0.0008(9) 
C6 0.0442(12) 0.0531(13) 0.0671(14) -0.0063(11) -0.0219(11) 0.0010(10) 
C7 0.0476(13) 0.0632(14) 0.0757(15) -0.0008(13) -0.0251(12) -0.0085(11) 
C8 0.0707(16) 0.0478(13) 0.0735(15) 0.0049(12) -0.0422(13) -0.0147(12) 
C9 0.0695(16) 0.0538(13) 0.0561(13) -0.0109(11) -0.0268(12) -0.0024(12) 
C10 0.0498(12) 0.0543(13) 0.0516(12) -0.0048(10) -0.0178(10) -0.0040(10) 
C11 0.0402(11) 0.0409(11) 0.0472(11) -0.0049(9) -0.0201(9) -0.0001(9) 
C12 0.0577(14) 0.0544(13) 0.0682(14) 0.0074(12) -0.0212(11) -0.0008(11) 
C13 0.092(2) 0.0480(14) 0.102(2) 0.0139(14) -0.0484(17) 0.0019(14) 
C14 0.0839(19) 0.0515(15) 0.106(2) -0.0197(15) -0.0598(17) 0.0207(14) 
C15 0.0572(14) 0.0756(17) 0.0737(16) -0.0278(14) -0.0306(12) 0.0222(13) 
C16 0.0511(13) 0.0568(13) 0.0542(12) -0.0066(10) -0.0204(10) 0.0059(11) 
C17 0.0373(11) 0.0502(12) 0.0564(12) -0.0023(10) -0.0203(9) -0.0007(9) 
C18 0.0664(16) 0.0819(17) 0.0707(15) 0.0182(13) -0.0328(13) -0.0074(13) 
C19 0.0519(14) 0.0932(19) 0.0647(15) 0.0088(14) -0.0121(12) -0.0031(13) 
C20 0.0656(16) 0.0728(17) 0.132(2) -0.0260(17) -0.0516(16) -0.0017(13) 
C21 0.0426(11) 0.0399(11) 0.0561(12) -0.0066(9) -0.0210(9) 0.0080(9) 
C22 0.0749(16) 0.0446(13) 0.0978(18) -0.0158(12) -0.0445(14) 0.0112(12) 
C23 0.0498(14) 0.0758(16) 0.0721(16) 0.0005(13) -0.0103(12) 0.0134(12) 
C24 0.0777(16) 0.0518(13) 0.0783(16) -0.0009(12) -0.0462(13) 0.0101(12) 
  
_geom_special_details 
; 
 All esds (except the esd in the dihedral angle between two l.s. planes) 
 are estimated using the full covariance matrix.  The cell esds are taken 
 into account individually in the estimation of esds in distances, angles 
 and torsion angles; correlations between esds in cell parameters are only 
 used when they are defined by crystal symmetry.  An approximate (isotropic) 
 treatment of cell esds is used for estimating esds involving l.s. planes. 
; 
  
loop_ 
_geom_bond_atom_site_label_1 
_geom_bond_atom_site_label_2 
_geom_bond_distance 
_geom_bond_site_symmetry_2 
_geom_bond_publ_flag 
N1 C1 1.342(2) . ? 
N1 C4 1.382(2) . ? 
N2 C3 1.324(2) . ? 
N2 C17 1.473(3) . ? 
N2 H2A 0.88(3) . ? 
N3 C4 1.289(2) . ? 
N3 C21 1.482(2) . ? 
C1 C2 1.452(3) . ? 
C1 C5 1.476(3) . ? 
C2 C3 1.397(3) . ? 
C2 C11 1.489(3) . ? 
C3 C4 1.523(3) . ? 
C5 C10 1.388(3) . ? 
C5 C6 1.392(3) . ? 
C6 C7 1.373(3) . ? 
C6 H6A 0.9300 . ? 
C7 C8 1.374(3) . ? 
C7 H7A 0.9300 . ? 
C8 C9 1.373(3) . ? 
C8 H8A 0.9300 . ? 
C9 C10 1.379(3) . ? 
C9 H9A 0.9300 . ? 
C10 H10A 0.9300 . ? 
C11 C12 1.383(3) . ? 
C11 C16 1.390(3) . ? 
C12 C13 1.383(3) . ? 
C12 H12A 0.9300 . ? 
C13 C14 1.380(4) . ? 
C13 H13A 0.9300 . ? 
C14 C15 1.363(4) . ? 
C14 H14A 0.9300 . ? 
C15 C16 1.381(3) . ? 
C15 H15A 0.9300 . ? 
C16 H16A 0.9300 . ? 
C17 C18 1.519(3) . ? 
C17 C19 1.516(3) . ? 
C17 C20 1.523(3) . ? 
C18 H18A 0.9600 . ? 
C18 H18B 0.9600 . ? 
C18 H18C 0.9600 . ? 
C19 H19A 0.9600 . ? 
C19 H19B 0.9600 . ? 
C19 H19C 0.9600 . ? 
C20 H20A 0.9600 . ? 
C20 H20B 0.9600 . ? 
C20 H20C 0.9600 . ? 
C21 C24 1.517(3) . ? 
C21 C23 1.529(3) . ? 
C21 C22 1.527(3) . ? 
C22 H22A 0.9600 . ? 
C22 H22B 0.9600 . ? 
C22 H22C 0.9600 . ? 
C23 H23A 0.9600 . ? 
C23 H23B 0.9600 . ? 
C23 H23C 0.9600 . ? 
C24 H24A 0.9600 . ? 
C24 H24B 0.9600 . ? 
C24 H24C 0.9600 . ? 
  
loop_ 
_geom_angle_atom_site_label_1 
_geom_angle_atom_site_label_2 
_geom_angle_atom_site_label_3 
_geom_angle 
_geom_angle_site_symmetry_1 
_geom_angle_site_symmetry_3 
_geom_angle_publ_flag 
C1 N1 C4 104.67(16) . . ? 
C3 N2 C17 132.81(18) . . ? 
C3 N2 H2A 114.2(18) . . ? 
C17 N2 H2A 112.9(18) . . ? 
C4 N3 C21 123.67(17) . . ? 
N1 C1 C2 115.57(16) . . ? 
N1 C1 C5 118.09(17) . . ? 
C2 C1 C5 126.34(16) . . ? 
C3 C2 C1 104.47(15) . . ? 
C3 C2 C11 131.59(18) . . ? 
C1 C2 C11 123.54(16) . . ? 
N2 C3 C2 140.29(18) . . ? 
N2 C3 C4 114.60(16) . . ? 
C2 C3 C4 105.08(17) . . ? 
N3 C4 N1 130.66(17) . . ? 
N3 C4 C3 119.14(17) . . ? 
N1 C4 C3 110.20(15) . . ? 
C10 C5 C6 118.14(19) . . ? 
C10 C5 C1 122.80(18) . . ? 
C6 C5 C1 119.01(17) . . ? 
C7 C6 C5 120.81(19) . . ? 
C7 C6 H6A 119.6 . . ? 
C5 C6 H6A 119.6 . . ? 
C6 C7 C8 120.3(2) . . ? 
C6 C7 H7A 119.8 . . ? 
C8 C7 H7A 119.8 . . ? 
C9 C8 C7 119.7(2) . . ? 
C9 C8 H8A 120.2 . . ? 
C7 C8 H8A 120.2 . . ? 
C8 C9 C10 120.4(2) . . ? 
C8 C9 H9A 119.8 . . ? 
C10 C9 H9A 119.8 . . ? 
C9 C10 C5 120.7(2) . . ? 
C9 C10 H10A 119.7 . . ? 
C5 C10 H10A 119.7 . . ? 
C12 C11 C16 117.29(19) . . ? 
C12 C11 C2 120.23(17) . . ? 
C16 C11 C2 122.44(18) . . ? 
C11 C12 C13 121.7(2) . . ? 
C11 C12 H12A 119.2 . . ? 
C13 C12 H12A 119.2 . . ? 
C14 C13 C12 119.7(2) . . ? 
C14 C13 H13A 120.1 . . ? 
C12 C13 H13A 120.1 . . ? 
C15 C14 C13 119.4(2) . . ? 
C15 C14 H14A 120.3 . . ? 
C13 C14 H14A 120.3 . . ? 
C14 C15 C16 120.8(2) . . ? 
C14 C15 H15A 119.6 . . ? 
C16 C15 H15A 119.6 . . ? 
C15 C16 C11 121.0(2) . . ? 
C15 C16 H16A 119.5 . . ? 
C11 C16 H16A 119.5 . . ? 
N2 C17 C18 110.71(17) . . ? 
N2 C17 C19 110.82(18) . . ? 
C18 C17 C19 111.22(18) . . ? 
N2 C17 C20 105.60(17) . . ? 
C18 C17 C20 109.1(2) . . ? 
C19 C17 C20 109.24(19) . . ? 
C17 C18 H18A 109.5 . . ? 
C17 C18 H18B 109.5 . . ? 
H18A C18 H18B 109.5 . . ? 
C17 C18 H18C 109.5 . . ? 
H18A C18 H18C 109.5 . . ? 
H18B C18 H18C 109.5 . . ? 
C17 C19 H19A 109.5 . . ? 
C17 C19 H19B 109.5 . . ? 
H19A C19 H19B 109.5 . . ? 
C17 C19 H19C 109.5 . . ? 
H19A C19 H19C 109.5 . . ? 
H19B C19 H19C 109.5 . . ? 
C17 C20 H20A 109.5 . . ? 
C17 C20 H20B 109.5 . . ? 
H20A C20 H20B 109.5 . . ? 
C17 C20 H20C 109.5 . . ? 
H20A C20 H20C 109.5 . . ? 
H20B C20 H20C 109.5 . . ? 
N3 C21 C24 112.17(16) . . ? 
N3 C21 C23 108.23(16) . . ? 
C24 C21 C23 110.59(19) . . ? 
N3 C21 C22 105.64(16) . . ? 
C24 C21 C22 109.22(18) . . ? 
C23 C21 C22 110.90(17) . . ? 
C21 C22 H22A 109.5 . . ? 
C21 C22 H22B 109.5 . . ? 
H22A C22 H22B 109.5 . . ? 
C21 C22 H22C 109.5 . . ? 
H22A C22 H22C 109.5 . . ? 
H22B C22 H22C 109.5 . . ? 
C21 C23 H23A 109.5 . . ? 
C21 C23 H23B 109.5 . . ? 
H23A C23 H23B 109.5 . . ? 
C21 C23 H23C 109.5 . . ? 
H23A C23 H23C 109.5 . . ? 
H23B C23 H23C 109.5 . . ? 
C21 C24 H24A 109.5 . . ? 
C21 C24 H24B 109.5 . . ? 
H24A C24 H24B 109.5 . . ? 
C21 C24 H24C 109.5 . . ? 
H24A C24 H24C 109.5 . . ? 
H24B C24 H24C 109.5 . . ? 
  
_refine_diff_density_max         0.180 
_refine_diff_density_min         -0.158 
_refine_diff_density_rms         0.034 
  
_shelx_res_file 
; 
  
    RP2166.res created by SHELXL-2014/7 
  
  
TITL rp2166m in P-1 
CELL 0.71073  10.29826  10.35860  10.93921  89.7218  67.7298  85.3032 
ZERR    2.00   0.00090   0.00087   0.00096   0.0069   0.0082   0.0070 
LATT 1 
SFAC C  H  N 
UNIT 48  58  6 
L.S. 8 
ACTA 
BOND $H 
FMAP 2 
PLAN 0 
TEMP 24 
WGHT    0.061000    0.097200 
FVAR       0.24013 
N1    3    0.823968    0.589139    0.247123    11.00000    0.04159    0.03837 = 
         0.05572   -0.00489   -0.02046    0.00228 
N2    3    1.134174    0.648212    0.303150    11.00000    0.04270    0.04358 = 
         0.07575   -0.01028   -0.02677    0.00488 
H2A   2    1.106758    0.730303    0.324192    11.00000    0.09243 
N3    3    0.891242    0.783747    0.322145    11.00000    0.04009    0.03798 = 
         0.05453   -0.00478   -0.01797    0.00420 
C1    1    0.898161    0.473461    0.211240    11.00000    0.04048    0.04015 = 
         0.04078    0.00080   -0.01402   -0.00233 
C2    1    1.035691    0.463361    0.220203    11.00000    0.03643    0.03882 = 
         0.04375   -0.00141   -0.01435    0.00049 
C3    1    1.047042    0.585585    0.266724    11.00000    0.03747    0.04122 = 
         0.04473    0.00107   -0.01417    0.00028 
C4    1    0.910313    0.664579    0.281388    11.00000    0.03679    0.03940 = 
         0.04310    0.00110   -0.01395    0.00143 
C5    1    0.834514    0.370081    0.166595    11.00000    0.04481    0.03639 = 
         0.04567    0.00186   -0.02142   -0.00078 
C6    1    0.689937    0.361079    0.227062    11.00000    0.04418    0.05307 = 
         0.06707   -0.00630   -0.02195    0.00104 
AFIX  43 
H6A   2    0.636066    0.418106    0.296492    11.00000   -1.20000 
AFIX   0 
C7    1    0.625916    0.269037    0.185445    11.00000    0.04761    0.06325 = 
         0.07567   -0.00075   -0.02511   -0.00854 
AFIX  43 
H7A   2    0.529379    0.263687    0.227336    11.00000   -1.20000 
AFIX   0 
C8    1    0.703787    0.184775    0.082190    11.00000    0.07073    0.04783 = 
         0.07346    0.00491   -0.04223   -0.01473 
AFIX  43 
H8A   2    0.660181    0.122467    0.054265    11.00000   -1.20000 
AFIX   0 
C9    1    0.846253    0.193033    0.020475    11.00000    0.06948    0.05382 = 
         0.05612   -0.01092   -0.02676   -0.00244 
AFIX  43 
H9A   2    0.898881    0.137083   -0.050378    11.00000   -1.20000 
AFIX   0 
C10   1    0.911742    0.283854    0.062986    11.00000    0.04978    0.05427 = 
         0.05163   -0.00480   -0.01784   -0.00397 
AFIX  43 
H10A  2    1.008632    0.287337    0.021796    11.00000   -1.20000 
AFIX   0 
C11   1    1.127275    0.339902    0.198043    11.00000    0.04020    0.04086 = 
         0.04718   -0.00494   -0.02011   -0.00013 
C12   1    1.093120    0.244506    0.291177    11.00000    0.05767    0.05441 = 
         0.06820    0.00742   -0.02123   -0.00083 
AFIX  43 
H12A  2    1.013912    0.259581    0.368688    11.00000   -1.20000 
AFIX   0 
C13   1    1.173756    0.127253    0.271984    11.00000    0.09159    0.04795 = 
         0.10236    0.01395   -0.04842    0.00190 
AFIX  43 
H13A  2    1.147511    0.063849    0.335144    11.00000   -1.20000 
AFIX   0 
C14   1    1.293303    0.104760    0.158725    11.00000    0.08389    0.05152 = 
         0.10645   -0.01966   -0.05975    0.02073 
AFIX  43 
H14A  2    1.349643    0.027236    0.146264    11.00000   -1.20000 
AFIX   0 
C15   1    1.328086    0.197113    0.065306    11.00000    0.05724    0.07558 = 
         0.07373   -0.02778   -0.03055    0.02221 
AFIX  43 
H15A  2    1.408071    0.181816   -0.011501    11.00000   -1.20000 
AFIX   0 
C16   1    1.246055    0.313116    0.083269    11.00000    0.05113    0.05677 = 
         0.05425   -0.00664   -0.02036    0.00587 
AFIX  43 
H16A  2    1.270616    0.374251    0.017619    11.00000   -1.20000 
AFIX   0 
C17   1    1.273502    0.610048    0.307066    11.00000    0.03731    0.05022 = 
         0.05643   -0.00233   -0.02027   -0.00073 
C18   1    1.266504    0.494696    0.394873    11.00000    0.06640    0.08193 = 
         0.07071    0.01816   -0.03281   -0.00742 
AFIX  33 
H18A  2    1.358116    0.471313    0.396164    11.00000   -1.50000 
H18B  2    1.201052    0.517080    0.483005    11.00000   -1.50000 
H18C  2    1.235918    0.422772    0.360959    11.00000   -1.50000 
AFIX   0 
C19   1    1.382785    0.581762    0.168846    11.00000    0.05193    0.09319 = 
         0.06466    0.00875   -0.01213   -0.00308 
AFIX  33 
H19A  2    1.472621    0.557128    0.173621    11.00000   -1.50000 
H19B  2    1.355717    0.512363    0.128237    11.00000   -1.50000 
H19C  2    1.389206    0.657885    0.117170    11.00000   -1.50000 
AFIX   0 
C20   1    1.311353    0.726486    0.367286    11.00000    0.06557    0.07283 = 
         0.13179   -0.02602   -0.05163   -0.00172 
AFIX  33 
H20A  2    1.401897    0.707292    0.372447    11.00000   -1.50000 
H20B  2    1.314346    0.800151    0.312989    11.00000   -1.50000 
H20C  2    1.241672    0.745402    0.454378    11.00000   -1.50000 
AFIX   0 
C21   1    0.759755    0.867595    0.346032    11.00000    0.04265    0.03990 = 
         0.05607   -0.00657   -0.02102    0.00804 
C22   1    0.792235    1.004019    0.370588    11.00000    0.07486    0.04457 = 
         0.09785   -0.01575   -0.04451    0.01125 
AFIX  33 
H22A  2    0.710289    1.063137    0.386806    11.00000   -1.50000 
H22B  2    0.818328    1.004569    0.446025    11.00000   -1.50000 
H22C  2    0.868513    1.030146    0.294377    11.00000   -1.50000 
AFIX   0 
C23   1    0.643752    0.819988    0.468280    11.00000    0.04977    0.07582 = 
         0.07213    0.00055   -0.01029    0.01343 
AFIX  33 
H23A  2    0.557567    0.873202    0.485391    11.00000   -1.50000 
H23B  2    0.630305    0.731744    0.453169    11.00000   -1.50000 
H23C  2    0.670552    0.825128    0.543033    11.00000   -1.50000 
AFIX   0 
C24   1    0.716504    0.867792    0.228001    11.00000    0.07774    0.05182 = 
         0.07827   -0.00086   -0.04624    0.01007 
AFIX  33 
H24A  2    0.631208    0.923067    0.247548    11.00000   -1.50000 
H24B  2    0.789791    0.899219    0.152611    11.00000   -1.50000 
H24C  2    0.701141    0.781215    0.209149    11.00000   -1.50000 
  
AFIX   0 
HKLF 4 
  
REM  rp2166m in P-1 
REM R1 =  0.0619 for    2870 Fo > 4sig(Fo)  and  0.1173 for all    4946 data 
REM    248 parameters refined using      0 restraints 
  
END 
  
WGHT      0.0553      0.1170 
  
REM Highest difference peak  0.180,  deepest hole -0.158,  1-sigma level  0.034 
Q1    1   0.9618  0.8395  0.3202  11.00000  0.05    0.18 
Q2    1   0.8288  0.8298  0.3355  11.00000  0.05    0.16 
Q3    1   0.9791  0.6381  0.2890  11.00000  0.05    0.15 
Q4    1   1.3448  0.4968  0.4339  11.00000  0.05    0.14 
Q5    1   1.1450  0.3055  0.1262  11.00000  0.05    0.14 
Q6    1   1.2829  0.4128  0.3057  11.00000  0.05    0.14 
Q7    1   1.1723  0.4876  0.4476  11.00000  0.05    0.13 
Q8    1   0.9765  0.4611  0.1954  11.00000  0.05    0.13 
Q9    1   1.0252  0.5141  0.2955  11.00000  0.05    0.13 
Q10   1   1.2992 -0.0079  0.2081  11.00000  0.05    0.13 
Q11   1   0.8687  0.4375  0.1575  11.00000  0.05    0.12 
Q12   1   1.1453  0.5017  0.2325  11.00000  0.05    0.12 
Q13   1   1.2988  0.5797  0.4650  11.00000  0.05    0.12 
Q14   1   0.6464  0.9568  0.2473  11.00000  0.05    0.12 
Q15   1   0.5800  0.9227  0.5080  11.00000  0.05    0.12 
Q16   1   0.5999  0.7311  0.4467  11.00000  0.05    0.11 
Q17   1   1.2037  0.6150  0.3144  11.00000  0.05    0.11 
Q18   1   1.3351  0.5961  0.1008  11.00000  0.05    0.11 
Q19   1   1.0177  0.3291 -0.0174  11.00000  0.05    0.11 
Q20   1   1.2647  0.1398  0.0900  11.00000  0.05    0.11 
; 
_shelx_res_checksum              42502 
  
_shelx_hkl_file 
; 
   0   0   2  501.84    1.86 
   0   0  -3   16.01    0.41 
   0   0   3   15.60    0.41 
   0   0  -4   24.84    0.59 
   0   0   4   24.08    0.59 
   0   0  -4   24.96    0.56 
   0   0  -5   -0.07    0.09 
   0   0  -5    0.02    0.06 
   0   0  -5   -0.08    0.08 
   0   0   5   -0.07    0.09 
   0   0  -6   -0.04    0.08 
   0   0  -6   -0.07    0.07 
   0   0   6   -0.03    0.08 
   0   0  -7    4.97    0.34 
   0   0   7    4.62    0.35 
   0   0  -8    4.49    0.34 
   0   0   8    3.94    0.36 
   0   0  -9    0.58    0.14 
   0   0   9    0.71    0.17 
   0   0  10    0.10    0.10 
   0   0 -10    0.33    0.12 
   0   0  11    0.21    0.16 
   0   0 -12    0.17    0.17 
   0  -1  12    0.15    0.13 
   0   1 -11    0.09    0.12 
   0  -1  11    0.11    0.14 
   0  -1  10    2.63    0.34 
   0  -1   9    0.87    0.22 
   0   1  -9    0.75    0.15 
   0   1  -8    0.78    0.15 
   0  -1   8    0.84    0.20 
   0  -1   7   -0.09    0.13 
   0   1  -7    0.01    0.07 
   0   1  -6   36.88    0.74 
   0  -1   6   36.73    0.96 
   0   1  -5    0.60    0.12 
   0   1  -5    0.51    0.09 
   0  -1   5    0.55    0.13 
   0  -1   4   30.82    0.73 
   0   1  -4   30.74    0.51 
   0   1  -4   32.17    0.77 
   0   1  -4   32.05    0.73 
   0  -1   3  105.84    1.18 
   0   1  -3  105.54    1.17 
   0  -1   2 1000.00    3.09 
   0   1   1    2.36    0.13 
   0  -1  -2   48.67    0.53 
   0  -1  -3    4.13    0.19 
   0   1   3    4.08    0.20 
   0   1   4    6.53    0.29 
   0  -1  -4    6.46    0.33 
   0  -1  -4    6.40    0.28 
   0  -1  -5   32.05    0.70 
   0   1   5   30.71    0.70 
   0  -1  -5   30.46    0.78 
   0  -1  -6    8.99    0.47 
   0  -1  -6    9.24    0.42 
   0   1   6    8.46    0.41 
   0  -1  -6    8.57    0.44 
   0  -1  -7    0.19    0.11 
   0   1   7    0.35    0.12 
   0  -1  -8    0.23    0.11 
   0   1   8    0.32    0.13 
   0  -1  -9    3.17    0.34 
   0  -1  -9    3.08    0.25 
   0   1   9    2.93    0.32 
   0  -1 -10    0.18    0.11 
   0  -1 -10    0.01    0.13 
   0   1  10    0.05    0.10 
   0  -1 -11    0.02    0.14 
   0   1  11   -0.04    0.10 
   0  -1 -11    0.37    0.16 
   0  -1 -12   -0.11    0.18 
   0  -2  13   -0.08    0.13 
   0  -2  12    0.00    0.13 
   0   2 -11    0.41    0.16 
   0  -2  11    0.20    0.15 
   0  -2  10    0.78    0.22 
   0   2 -10    1.02    0.20 
   0   2  -9    0.52    0.16 
   0  -2   9    0.39    0.16 
   0   2  -9    0.34    0.09 
   0   2  -8   34.44    0.96 
   0  -2   8   34.45    1.12 
   0   2  -8   34.73    0.72 
   0   2  -7    1.04    0.12 
   0  -2   7    0.89    0.21 
   0   2  -6   33.48    0.57 
   0  -2   6   34.42    0.98 
   0  -2   5   50.43    1.09 
   0   2  -5   49.71    0.58 
   0   2  -4   40.92    0.63 
   0   2  -4   41.71    0.90 
   0   2  -4   39.85    0.40 
   0  -2   4   39.94    0.89 
   0   2  -3   66.49    0.63 
   0  -2   3   66.22    1.04 
   0  -2   2   65.38    0.92 
   0  -2   1    5.96    0.24 
   0  -2   1    6.23    0.17 
   0  -2   0  105.80    0.91 
   0   2   0  105.06    0.77 
   0  -2   0  104.14    0.77 
   0  -2  -1   88.97    1.00 
   0   2   1   90.88    0.75 
   0  -2  -1   91.15    0.75 
   0   2   1   90.23    0.87 
   0  -2  -2    6.92    0.29 
   0   2   2    7.08    0.19 
   0  -2  -2    7.24    0.33 
   0   2   2    7.09    0.30 
   0  -2  -2    7.06    0.19 
   0  -2  -3   14.75    0.27 
   0  -2  -3   15.19    0.36 
   0  -2  -3   15.14    0.52 
   0   2   3   14.69    0.28 
   0  -2  -3   14.37    0.49 
   0  -2  -4   62.83    0.84 
   0  -2  -4   61.20    0.61 
   0  -2  -4   60.67    1.15 
   0  -2  -4   62.88    1.14 
   0  -2  -5   12.20    0.30 
   0  -2  -5   12.19    0.42 
   0  -2  -5   12.07    0.57 
   0  -2  -5   11.94    0.53 
   0  -2  -6   13.99    0.53 
   0  -2  -6   14.17    0.50 
   0  -2  -6   13.90    0.63 
   0  -2  -6   14.07    0.37 
   0  -2  -6   13.60    0.67 
   0  -2  -7    1.78    0.20 
   0  -2  -7    1.48    0.13 
   0  -2  -7    2.09    0.27 
   0  -2  -7    1.59    0.27 
   0  -2  -8    1.40    0.14 
   0  -2  -8    1.60    0.25 
   0  -2  -8    1.59    0.28 
   0  -2  -9    0.29    0.15 
   0  -2  -9    0.05    0.12 
   0  -2 -10    0.18    0.11 
   0  -2 -10    0.23    0.15 
   0  -2 -11    0.11    0.12 
   0  -2 -11    0.32    0.19 
   0  -2 -12    0.41    0.24 
   0  -3  13   -0.08    0.14 
   0  -3  12   -0.07    0.13 
   0  -3  11    0.88    0.25 
   0   3 -10    1.18    0.20 
   0  -3  10    1.11    0.26 
   0  -3   9    1.46    0.27 
   0   3  -9    2.00    0.24 
   0  -3   8    3.52    0.40 
   0   3  -8    3.22    0.15 
   0   3  -8    3.82    0.30 
   0   3  -7    2.20    0.12 
   0   3  -7    2.49    0.22 
   0   3  -7    2.37    0.11 
   0  -3   7    2.50    0.33 
   0   3  -6    1.68    0.16 
   0  -3   6    1.99    0.26 
   0   3  -5   21.00    0.47 
   0  -3   5   21.36    0.77 
   0  -3   4   33.61    0.88 
   0  -3   3    3.35    0.27 
   0  -3   2   74.31    0.63 
   0  -3   2   72.83    1.11 
   0  -3   1   14.69    0.37 
   0   3  -1   16.37    0.44 
   0  -3   1   16.01    0.45 
   0   3   0    5.03    0.21 
   0  -3   0    4.82    0.21 
   0  -3   0    4.53    0.24 
   0  -3  -1   15.64    0.50 
   0   3   1   16.57    0.41 
   0  -3  -1   16.46    0.30 
   0   3   2    2.86    0.16 
   0  -3  -2    2.68    0.24 
   0  -3  -2    3.21    0.17 
   0   3   2    3.13    0.22 
   0  -3  -3    1.13    0.20 
   0  -3  -3    1.54    0.12 
   0  -3  -3    1.32    0.17 
   0   3   3    1.46    0.17 
   0   3   3    1.53    0.11 
   0  -3  -4    7.82    0.46 
   0   3   4    8.20    0.24 
   0  -3  -4    8.26    0.31 
   0  -3  -4    8.21    0.24 
   0  -3  -4    8.11    0.44 
   0  -3  -5    6.60    0.44 
   0  -3  -5    6.73    0.43 
   0  -3  -5    6.79    0.31 
   0  -3  -5    6.31    0.21 
   0  -3  -6    0.17    0.04 
   0  -3  -6    0.23    0.07 
   0  -3  -6    0.20    0.07 
   0  -3  -6    0.17    0.11 
   0  -3  -6    0.05    0.11 
   0  -3  -7    0.79    0.13 
   0  -3  -7    0.58    0.19 
   0  -3  -7    0.78    0.20 
   0  -3  -7    0.75    0.08 
   0  -3  -7    0.70    0.13 
   0  -3  -8    0.03    0.02 
   0  -3  -8   -0.07    0.12 
   0  -3  -8   -0.03    0.10 
   0  -3  -9    2.58    0.36 
   0  -3  -9    2.67    0.39 
   0  -3 -10    0.42    0.19 
   0  -3 -10    0.04    0.15 
   0  -3 -11    0.07    0.14 
   0  -3 -11    0.01    0.11 
   0  -3 -12    0.03    0.11 
   0  -3 -12    0.39    0.23 
   0  -4  13    0.06    0.15 
   0  -4  12    0.43    0.19 
   0  -4  11    1.53    0.32 
   0  -4  10    0.19    0.19 
   0  -4   9    0.27    0.18 
   0  -4   8    0.22    0.17 
   0   4  -8    0.41    0.10 
   0  -4   7    0.83    0.22 
   0  -4   6    1.13    0.22 
   0  -4   5    1.71    0.25 
   0  -4   4   31.35    0.93 
   0  -4   3    0.69    0.18 
   0  -4   3    0.69    0.07 
   0  -4   2   66.80    0.78 
   0   4  -2   66.89    1.13 
   0  -4   2   66.02    1.18 
   0   4  -1    2.26    0.19 
   0  -4   1    1.95    0.17 
   0  -4   1    1.86    0.19 
   0   4   0   16.78    0.53 
   0  -4   0   16.91    0.52 
   0  -4   0   16.30    0.44 
   0  -4  -1   47.12    0.95 
   0   4   1   48.63    0.83 
   0  -4  -1   47.25    0.61 
   0  -4  -2   30.62    0.84 
   0   4   2   31.71    0.74 
   0  -4  -2   30.87    0.41 
   0   4   2   30.73    0.62 
   0   4   3   11.82    0.50 
   0  -4  -3   12.46    0.57 
   0   4   3   12.65    0.37 
   0  -4  -4    1.50    0.23 
   0  -4  -4    1.96    0.22 
   0   4   4    2.11    0.14 
   0  -4  -4    1.88    0.14 
   0  -4  -5    8.73    0.54 
   0  -4  -5    7.78    0.25 
   0  -4  -5    7.96    0.49 
   0  -4  -5    7.93    0.35 
   0  -4  -6    0.07    0.03 
   0  -4  -6    0.07    0.06 
   0  -4  -6    0.04    0.12 
   0  -4  -6    0.08    0.06 
   0  -4  -6    0.14    0.14 
   0  -4  -7    5.38    0.31 
   0  -4  -7    5.14    0.32 
   0  -4  -7    5.16    0.48 
   0  -4  -7    6.18    0.50 
   0  -4  -7    4.73    0.16 
   0  -4  -8    0.14    0.11 
   0  -4  -8   -0.05    0.11 
   0  -4  -9    0.27    0.17 
   0  -4  -9    0.02    0.15 
   0  -4 -10    1.50    0.33 
   0  -4 -10    1.56    0.31 
   0  -4 -11    0.23    0.16 
   0  -4 -11    0.36    0.22 
   0  -4 -12    0.27    0.22 
   0  -4 -12    0.24    0.16 
   0  -5  12    0.20    0.21 
   0  -5  11    1.06    0.31 
   0  -5  10    0.31    0.23 
   0  -5   9    0.44    0.22 
   0  -5   8    0.10    0.14 
   0  -5   7    3.25    0.42 
   0  -5   6    0.65    0.19 
   0  -5   5    2.57    0.32 
   0  -5   4   11.99    0.62 
   0  -5   4    9.94    0.21 
   0  -5   3    0.89    0.10 
   0  -5   3    1.19    0.22 
   0  -5   2   12.49    0.56 
   0   5  -2   12.93    0.54 
   0  -5   2   12.23    0.41 
   0  -5   1    3.51    0.26 
   0   5  -1    4.04    0.28 
   0  -5   1    4.02    0.26 
   0  -5   0    6.22    0.30 
   0  -5   0    6.87    0.39 
   0   5   0    6.71    0.38 
   0  -5  -1    6.44    0.27 
   0  -5  -1    6.63    0.40 
   0   5   1    6.53    0.35 
   0  -5  -2    9.90    0.27 
   0   5   2   10.22    0.45 
   0   5   2   10.72    0.43 
   0  -5  -2    9.72    0.54 
   0   5   3   21.17    0.56 
   0  -5  -3   18.87    0.32 
   0  -5  -3   20.55    0.80 
   0  -5  -4    0.13    0.12 
   0   5   4    0.15    0.06 
   0  -5  -5    6.63    0.54 
   0  -5  -5    6.56    0.33 
   0  -5  -5    6.50    0.46 
   0   5   5    6.63    0.27 
   0  -5  -6    1.83    0.18 
   0  -5  -6    1.96    0.14 
   0  -5  -6    1.88    0.28 
   0  -5  -6    2.35    0.34 
   0  -5  -7    0.58    0.18 
   0  -5  -7    0.51    0.21 
   0  -5  -8    0.05    0.13 
   0  -5  -8    0.35    0.14 
   0  -5  -9    0.03    0.11 
   0  -5  -9   -0.05    0.15 
   0  -5 -10    0.89    0.26 
   0  -5 -10    0.58    0.22 
   0  -5 -11    0.63    0.24 
   0  -5 -11    0.48    0.21 
   0  -5 -12    0.13    0.19 
   0  -6  12    0.37    0.24 
   0  -6  11    0.01    0.15 
   0  -6  10    0.62    0.25 
   0  -6   9    2.24    0.39 
   0  -6   8    0.01    0.15 
   0  -6   7    2.50    0.37 
   0  -6   6    0.15    0.12 
   0  -6   5    0.23    0.13 
   0  -6   4    2.82    0.33 
   0  -6   4    3.19    0.17 
   0  -6   3    5.28    0.26 
   0  -6   3    5.70    0.43 
   0  -6   2   10.86    0.57 
   0  -6   2   10.65    0.44 
   0  -6   1    5.17    0.33 
   0  -6   0    5.27    0.36 
   0  -6   0    5.47    0.31 
   0  -6  -1    5.90    0.43 
   0  -6  -1    6.22    0.29 
   0   6   2    5.70    0.35 
   0  -6  -2    5.20    0.42 
   0  -6  -2    5.68    0.24 
   0  -6  -3    3.21    0.14 
   0  -6  -3    3.15    0.37 
   0   6   3    3.57    0.26 
   0   6   4    0.26    0.08 
   0  -6  -4    0.40    0.15 
   0   6   5    1.78    0.16 
   0  -6  -5    1.74    0.33 
   0  -6  -6    4.33    0.49 
   0  -6  -7    1.09    0.26 
   0  -6  -7    1.06    0.24 
   0  -6  -8    0.54    0.22 
   0  -6  -8    0.72    0.26 
   0  -6  -9    0.60    0.19 
   0  -6  -9    0.22    0.16 
   0  -6 -10    0.87    0.28 
   0  -6 -10    1.38    0.35 
   0  -6 -11    0.59    0.22 
   0  -6 -11    0.21    0.22 
   0  -6 -12    0.93    0.29 
   0  -7  11    0.64    0.31 
   0  -7  10    0.16    0.18 
   0  -7   9    0.25    0.21 
   0  -7   8    0.34    0.19 
   0  -7   7    2.58    0.39 
   0  -7   6    1.09    0.24 
   0  -7   5    1.45    0.29 
   0  -7   4    0.10    0.05 
   0  -7   4    0.24    0.14 
   0  -7   3   -0.01    0.12 
   0  -7   3    0.01    0.06 
   0  -7   2    1.33    0.24 
   0  -7   2    1.34    0.18 
   0  -7   1    4.11    0.33 
   0  -7   0    0.03    0.09 
   0  -7  -1    8.14    0.53 
   0  -7  -2    0.37    0.16 
   0  -7  -3    0.02    0.11 
   0   7   4    2.07    0.21 
   0  -7  -4    2.34    0.34 
   0  -7  -5    1.14    0.29 
   0  -7  -6   12.12    0.83 
   0  -7  -7   -0.20    0.21 
   0  -7  -8    8.34    0.73 
   0  -7  -9    0.00    0.15 
   0  -7 -10    3.28    0.49 
   0  -7 -11    0.45    0.22 
   0  -8  10    0.08    0.15 
   0  -8   9    0.55    0.26 
   0  -8   8    0.21    0.20 
   0  -8   7    0.85    0.26 
   0  -8   6    0.19    0.14 
   0  -8   5   -0.03    0.14 
   0  -8   4    4.69    0.49 
   0  -8   4    3.80    0.25 
   0  -8   3    4.42    0.31 
   0  -8   3    4.32    0.45 
   0  -8   2   19.37    0.87 
   0  -8   2   21.34    0.74 
   0  -8   1   21.07    0.87 
   0  -8   1   20.72    0.80 
   0  -8   0    4.30    0.40 
   0  -8  -1    0.37    0.16 
   0  -8  -2    3.97    0.43 
   0  -8  -3    1.07    0.27 
   0  -8  -4   12.83    0.84 
   0  -8  -5    2.81    0.42 
   0  -8  -6    8.11    0.72 
   0  -8  -7    0.85    0.27 
   0  -8  -8    0.43    0.22 
   0  -8  -9    0.35    0.23 
   0  -8 -10    0.02    0.13 
   0  -9   9    0.12    0.16 
   0  -9   8   -0.09    0.16 
   0  -9   7   -0.02    0.19 
   0  -9   6    0.36    0.20 
   0  -9   5    0.05    0.16 
   0  -9   4    3.56    0.45 
   0  -9   3    5.88    0.39 
   0  -9   3    5.99    0.54 
   0  -9   2    2.89    0.31 
   0  -9   2    2.92    0.37 
   0  -9   1    4.73    0.45 
   0  -9   1    4.40    0.39 
   0  -9   0    0.80    0.20 
   0  -9  -1    5.89    0.51 
   0  -9  -2    4.19    0.46 
   0  -9  -3   10.79    0.75 
   0  -9  -4    6.44    0.59 
   0  -9  -5    0.06    0.15 
   0  -9  -6    0.17    0.18 
   0  -9  -7    0.60    0.24 
   0  -9  -8   -0.09    0.18 
   0  -9  -9   -0.39    0.23 
   0 -10   8    0.47    0.26 
   0 -10   7    0.34    0.25 
   0 -10   6    1.81    0.38 
   0 -10   5    0.20    0.21 
   0 -10   4    0.19    0.16 
   0 -10   3    2.53    0.27 
   0 -10   3    1.77    0.31 
   0 -10   2    0.33    0.14 
   0 -10   2    0.41    0.18 
   0 -10   1    3.49    0.42 
   0 -10   1    3.44    0.38 
   0 -10   0    0.54    0.18 
   0 -10   0    0.88    0.22 
   0 -10  -1    8.12    0.64 
   0 -10  -2    7.02    0.62 
   0 -10  -3    0.36    0.20 
   0 -10  -4    0.54    0.23 
   0 -10  -5    0.01    0.19 
   0 -10  -6   -0.01    0.16 
   0 -10  -7    0.25    0.21 
   0 -11   7    0.70    0.28 
   0 -11   6    0.62    0.27 
   0 -11   5    2.06    0.41 
   0 -11   4    0.41    0.23 
   0 -11   3    1.14    0.30 
   0 -11   2    3.64    0.46 
   0 -11   2    2.90    0.34 
   0 -11   1    2.19    0.35 
   0 -11   1    2.36    0.34 
   0 -11   0    0.21    0.15 
   0 -11   0    0.21    0.17 
   0 -11  -1    0.17    0.15 
   0 -11  -1    0.09    0.12 
   0 -11  -2   -0.26    0.17 
   0 -11  -2    0.25    0.14 
   0 -11  -3    0.84    0.27 
   0 -11  -4    0.38    0.21 
   0 -11  -5   -0.01    0.18 
   0 -11  -6    0.51    0.25 
   0 -12   5    0.21    0.22 
   0 -12   4    0.02    0.13 
   0 -12   3   -0.32    0.21 
   0 -12   2    0.20    0.17 
   0 -12   1    0.14    0.17 
   0 -12   1    0.01    0.10 
   0 -12   0    0.38    0.19 
   0 -12   0   -0.07    0.11 
   0 -12  -1    1.84    0.35 
   0 -12  -1    1.21    0.26 
   0 -12  -2    0.79    0.26 
   0 -12  -3   -0.42    0.20 
   0 -12  -4    0.16    0.25 
   0 -12  -5   -0.04    0.13 
   0 -13   3    0.32    0.24 
   0 -13   2   -0.11    0.16 
   0 -13   1   -0.06    0.16 
   0 -13   0    0.67    0.23 
   0 -13   0    0.83    0.25 
   0 -13  -1    0.12    0.13 
   0 -13  -2    0.56    0.23 
   0 -13  -3    0.48    0.25 
   0 -14   1    0.11    0.12 
   0 -14  -1    0.97    0.29 
  -1 -14  -2    0.01    0.15 
  -1 -14   0    0.25    0.14 
  -1 -13  -3    0.08    0.16 
  -1 -13  -2    0.25    0.17 
  -1 -13  -1    0.04    0.12 
  -1 -13  -1   -0.14    0.14 
  -1 -13   0    0.05    0.12 
  -1 -13   1    0.14    0.14 
  -1 -13   2   -0.12    0.16 
  -1 -13   3    0.18    0.14 
  -1 -12  -5   -0.04    0.19 
  -1 -12  -4   -0.11    0.18 
  -1 -12  -3    0.90    0.28 
  -1 -12  -2    0.61    0.24 
  -1 -12  -1   -0.18    0.20 
  -1 -12  -1   -0.03    0.13 
  -1 -12   0    1.36    0.28 
  -1 -12   0    1.36    0.30 
  -1 -12   1    0.07    0.15 
  -1 -12   2    0.07    0.15 
  -1 -12   3    1.60    0.36 
  -1 -12   4    0.22    0.21 
  -1 -12   5    0.97    0.31 
  -1 -11  -6    0.35    0.20 
  -1 -11  -5    0.75    0.27 
  -1 -11  -4    0.34    0.21 
  -1 -11  -3    1.33    0.29 
  -1 -11  -2    1.13    0.27 
  -1 -11  -1    0.23    0.17 
  -1 -11   0    0.14    0.15 
  -1 -11   1    0.86    0.22 
  -1 -11   1    0.46    0.16 
  -1 -11   2    0.08    0.16 
  -1 -11   3    2.25    0.39 
  -1 -11   4    0.03    0.17 
  -1 -11   5    1.02    0.28 
  -1 -11   6   -0.20    0.23 
  -1 -10  -8    0.63    0.27 
  -1 -10  -7   -0.10    0.13 
  -1 -10  -6   -0.12    0.20 
  -1 -10  -5    0.65    0.26 
  -1 -10  -4    0.17    0.17 
  -1 -10  -3    0.59    0.22 
  -1 -10  -2    2.82    0.39 
  -1 -10  -1    0.07    0.13 
  -1 -10   0   16.09    0.82 
  -1 -10   1    3.17    0.42 
  -1 -10   1    2.44    0.31 
  -1 -10   2    8.13    0.52 
  -1 -10   2    8.66    0.68 
  -1 -10   3    0.68    0.24 
  -1 -10   4    1.62    0.35 
  -1 -10   5    0.00    0.13 
  -1 -10   6    0.21    0.21 
  -1 -10   7    0.14    0.16 
  -1  -9  -9    0.57    0.26 
  -1  -9  -8    0.04    0.15 
  -1  -9  -7   -0.21    0.19 
  -1  -9  -6   -0.13    0.15 
  -1  -9  -5    3.11    0.44 
  -1  -9  -4    2.26    0.36 
  -1  -9  -3    0.56    0.20 
  -1  -9  -3    0.55    0.11 
  -1  -9  -2   22.77    1.05 
  -1  -9  -2   23.80    0.73 
  -1  -9  -1    6.74    0.53 
  -1  -9  -1    6.10    0.40 
  -1  -9   0    4.15    0.36 
  -1  -9   0    3.96    0.40 
  -1  -9   1    1.17    0.22 
  -1  -9   2    0.89    0.17 
  -1  -9   2    1.08    0.24 
  -1  -9   3    4.51    0.49 
  -1  -9   3    4.25    0.31 
  -1  -9   4    0.32    0.20 
  -1  -9   5    0.97    0.26 
  -1  -9   6    0.17    0.18 
  -1  -9   7   -0.03    0.19 
  -1  -9   8    0.22    0.19 
  -1  -9   9    0.12    0.20 
  -1  -8 -10   -0.07    0.18 
  -1  -8  -9    0.93    0.32 
  -1  -8  -8    8.90    0.77 
  -1  -8  -7    0.56    0.20 
  -1  -8  -6   13.04    0.86 
  -1  -8  -5    1.12    0.27 
  -1  -8  -4   29.89    1.18 
  -1  -8  -4   27.88    0.60 
  -1  -8  -3    1.14    0.14 
  -1  -8  -3    2.01    0.34 
  -1  -8  -2    6.25    0.51 
  -1  -8  -2    5.92    0.35 
  -1  -8  -1    0.58    0.14 
  -1  -8  -1    0.58    0.19 
  -1  -8   0    2.71    0.28 
  -1  -8   0    2.61    0.32 
  -1  -8   1    1.21    0.21 
  -1  -8   1    0.76    0.17 
  -1  -8   2    5.13    0.35 
  -1  -8   2    4.65    0.42 
  -1  -8   3    3.04    0.39 
  -1  -8   3    2.71    0.23 
  -1  -8   4    2.82    0.39 
  -1  -8   4    2.44    0.17 
  -1  -8   5    0.53    0.21 
  -1  -8   6    2.26    0.37 
  -1  -8   7    0.74    0.28 
  -1  -8   8   -0.02    0.18 
  -1  -8   9    1.00    0.30 
  -1  -8  10   -0.04    0.16 
  -1  -7 -11    0.11    0.15 
  -1  -7 -11    0.46    0.19 
  -1  -7 -10    3.85    0.50 
  -1  -7 -10    3.28    0.50 
  -1  -7  -9   -0.02    0.17 
  -1  -7  -9   -0.04    0.11 
  -1  -7  -8    5.64    0.60 
  -1  -7  -7    0.13    0.17 
  -1  -7  -6    6.90    0.62 
  -1  -7  -5    0.04    0.18 
   1   7   5    0.17    0.09 
  -1  -7  -4   11.26    0.70 
  -1  -7  -4   11.70    0.38 
  -1  -7  -3    6.01    0.30 
  -1  -7  -3    5.56    0.49 
  -1  -7  -2    2.38    0.21 
  -1  -7  -2    1.62    0.27 
   1   7   2    2.07    0.22 
  -1  -7  -1    0.64    0.18 
  -1  -7  -1    0.70    0.14 
  -1  -7   0    1.03    0.20 
  -1  -7   0    1.30    0.19 
  -1  -7   1    1.87    0.23 
  -1  -7   1    2.03    0.24 
  -1  -7   2    9.74    0.56 
  -1  -7   2    9.10    0.43 
  -1  -7   3    0.07    0.11 
  -1  -7   3    0.29    0.08 
  -1  -7   4    0.83    0.08 
  -1  -7   4    1.01    0.23 
  -1  -7   5    0.40    0.22 
  -1  -7   6    2.68    0.39 
  -1  -7   7   -0.01    0.15 
  -1  -7   8    0.71    0.24 
  -1  -7   9    0.41    0.20 
  -1  -7  10    0.08    0.14 
  -1  -6 -12   -0.05    0.13 
  -1  -6 -12    0.50    0.23 
  -1  -6 -11    0.19    0.15 
  -1  -6 -11    0.39    0.18 
  -1  -6 -10    0.89    0.30 
  -1  -6 -10    0.87    0.24 
  -1  -6  -9    0.40    0.18 
  -1  -6  -9    0.20    0.14 
  -1  -6  -8    0.50    0.18 
  -1  -6  -8    0.96    0.26 
  -1  -6  -7    0.55    0.10 
  -1  -6  -7    0.64    0.22 
  -1  -6  -7    0.74    0.17 
   1   6   6    4.56    0.28 
  -1  -6  -6    4.89    0.30 
  -1  -6  -6    4.26    0.38 
  -1  -6  -6    4.59    0.47 
  -1  -6  -5    2.96    0.38 
  -1  -6  -5    2.76    0.24 
   1   6   5    2.54    0.22 
   1   6   4    1.65    0.19 
  -1  -6  -4    1.32    0.27 
   1   6   3    2.30    0.23 
  -1  -6  -3    1.99    0.27 
   1   6   3    2.17    0.22 
  -1  -6  -2   28.18    0.92 
  -1  -6  -2   27.14    0.64 
   1   6   2   26.97    0.71 
  -1  -6  -1   27.67    0.87 
  -1  -6  -1   28.23    0.71 
  -1  -6   0   23.36    0.70 
  -1  -6   0   23.11    0.74 
  -1  -6   1    5.54    0.37 
  -1  -6   1    6.11    0.34 
  -1  -6   2    4.27    0.35 
  -1  -6   2    4.10    0.26 
  -1  -6   3   -0.07    0.11 
  -1  -6   3    0.09    0.13 
  -1  -6   3    0.03    0.04 
  -1  -6   4    3.81    0.40 
  -1  -6   5    0.21    0.16 
  -1  -6   6    1.36    0.29 
  -1  -6   7   -0.08    0.16 
  -1  -6   8    0.30    0.18 
  -1  -6   9    0.14    0.14 
  -1  -6  10    0.02    0.20 
  -1  -6  11   -0.02    0.18 
  -1  -5 -13    0.06    0.10 
  -1  -5 -12    0.44    0.21 
  -1  -5 -12    0.82    0.24 
  -1  -5 -11    0.16    0.13 
  -1  -5 -11    0.03    0.14 
  -1  -5 -10    0.54    0.20 
  -1  -5 -10    0.50    0.18 
  -1  -5  -9    1.71    0.30 
  -1  -5  -9    1.58    0.32 
  -1  -5  -8    1.27    0.26 
  -1  -5  -8    1.40    0.26 
  -1  -5  -7    0.32    0.17 
  -1  -5  -7    0.39    0.15 
  -1  -5  -7    0.45    0.09 
  -1  -5  -6    1.94    0.18 
  -1  -5  -6    1.85    0.30 
  -1  -5  -6    1.46    0.23 
   1   5   6    1.78    0.17 
  -1  -5  -5   -0.14    0.11 
  -1  -5  -5    0.12    0.06 
   1   5   5   -0.01    0.04 
  -1  -5  -5   -0.01    0.14 
   1   5   4   11.66    0.45 
  -1  -5  -4   12.26    0.46 
  -1  -5  -3   14.20    0.51 
   1   5   3   14.92    0.52 
   1   5   3   14.09    0.52 
   1   5   2    1.64    0.19 
   1   5   2    1.74    0.17 
  -1  -5  -2    1.71    0.20 
   1   5   1    2.25    0.23 
  -1  -5  -1    2.16    0.20 
  -1  -5   0    4.63    0.29 
  -1  -5   1    9.01    0.39 
  -1  -5   1    9.73    0.46 
  -1  -5   2    2.04    0.24 
  -1  -5   2    1.95    0.16 
  -1  -5   3    5.53    0.41 
  -1  -5   3    5.65    0.41 
  -1  -5   3    5.93    0.20 
  -1  -5   4    3.49    0.35 
  -1  -5   5    2.33    0.31 
  -1  -5   6   -0.12    0.14 
  -1  -5   7    0.68    0.20 
  -1  -5   8    0.69    0.21 
  -1  -5   9    0.35    0.18 
  -1  -5  10   -0.08    0.15 
  -1  -5  11    1.06    0.29 
  -1  -5  12    0.16    0.18 
  -1  -4 -13   -0.04    0.12 
  -1  -4 -12    0.05    0.15 
  -1  -4 -12   -0.05    0.12 
  -1  -4 -11    0.05    0.12 
  -1  -4 -11    0.09    0.13 
  -1  -4 -10    0.37    0.15 
  -1  -4 -10    0.16    0.11 
  -1  -4  -9    0.14    0.12 
  -1  -4  -9    0.09    0.11 
  -1  -4  -8    0.83    0.11 
  -1  -4  -8    0.84    0.23 
  -1  -4  -8    0.67    0.20 
  -1  -4  -7    0.38    0.16 
  -1  -4  -7    0.22    0.15 
  -1  -4  -7    0.22    0.07 
  -1  -4  -6    2.77    0.19 
  -1  -4  -6    2.42    0.28 
  -1  -4  -6    2.57    0.24 
  -1  -4  -5    1.51    0.21 
  -1  -4  -5    1.68    0.18 
  -1  -4  -5    1.57    0.15 
   1   4   5    1.56    0.15 
   1   4   4    0.37    0.08 
  -1  -4  -4    0.40    0.09 
  -1  -4  -4    0.40    0.12 
  -1  -4  -3   -0.03    0.07 
  -1  -4  -3    0.08    0.08 
   1   4   3    0.00    0.05 
   1   4   3   -0.05    0.08 
  -1  -4  -2    4.95    0.28 
   1   4   2    5.18    0.28 
   1   4   2    4.78    0.25 
  -1  -4  -1   22.74    0.62 
   1   4   1   21.61    0.60 
  -1  -4   0    1.99    0.19 
  -1  -4   1   26.90    0.69 
  -1  -4   2    1.74    0.12 
  -1  -4   2    1.78    0.21 
   1   4  -2    1.79    0.20 
  -1  -4   3   16.74    0.66 
  -1  -4   3   16.33    0.65 
  -1  -4   4    3.75    0.33 
  -1  -4   5    1.09    0.23 
   1   4  -6    1.13    0.11 
  -1  -4   6    1.21    0.23 
   1   4  -7   13.78    0.44 
  -1  -4   7   13.89    0.75 
   1   4  -8    0.10    0.08 
  -1  -4   8   -0.01    0.14 
  -1  -4   9    4.19    0.47 
  -1  -4  10    0.65    0.23 
  -1  -4  11    5.16    0.56 
  -1  -4  12    0.50    0.26 
  -1  -4  13    0.13    0.15 
  -1  -3 -12   -0.17    0.20 
  -1  -3 -12    0.08    0.10 
  -1  -3 -11    0.19    0.13 
  -1  -3 -11    0.16    0.14 
  -1  -3 -10    0.60    0.21 
  -1  -3 -10    0.53    0.19 
  -1  -3  -9    0.08    0.11 
  -1  -3  -9    0.06    0.05 
  -1  -3  -9   -0.03    0.11 
  -1  -3  -8    0.44    0.09 
  -1  -3  -8    0.37    0.14 
  -1  -3  -8    0.66    0.18 
  -1  -3  -7    2.07    0.28 
  -1  -3  -7    2.16    0.18 
  -1  -3  -7    1.96    0.27 
  -1  -3  -6    0.16    0.10 
  -1  -3  -6    0.05    0.04 
  -1  -3  -6    0.18    0.09 
  -1  -3  -5    6.94    0.29 
  -1  -3  -5    7.80    0.44 
  -1  -3  -5    7.03    0.35 
  -1  -3  -4    0.27    0.10 
  -1  -3  -4    0.13    0.05 
   1   3   4    0.19    0.07 
  -1  -3  -3    2.55    0.18 
  -1  -3  -3    2.88    0.22 
   1   3   3    2.78    0.18 
  -1  -3  -2    2.67    0.19 
  -1  -3  -2    2.61    0.17 
   1   3   2    2.52    0.17 
   1   3   2    2.68    0.18 
  -1  -3  -1    9.06    0.34 
   1   3   1    8.75    0.33 
  -1  -3   0    0.72    0.13 
  -1  -3   0    0.64    0.11 
  -1  -3   1    0.54    0.11 
  -1  -3   2   35.74    0.82 
  -1  -3   3   -0.01    0.11 
  -1  -3   3   -0.11    0.13 
  -1  -3   4    1.65    0.22 
  -1  -3   5   40.15    1.08 
  -1  -3   6    2.95    0.33 
  -1  -3   7   19.16    0.83 
   1   3  -7   15.11    0.29 
  -1  -3   8   23.28    0.97 
   1   3  -8   21.24    0.70 
   1   3  -9    8.61    0.49 
  -1  -3   9    7.70    0.60 
  -1  -3  10    1.85    0.33 
  -1  -3  11    0.59    0.21 
  -1  -3  12    0.20    0.17 
  -1  -2 -13    0.62    0.25 
  -1  -2 -12    0.76    0.28 
  -1  -2 -12    0.15    0.14 
  -1  -2 -11   -0.10    0.10 
  -1  -2 -11    0.14    0.19 
  -1  -2 -10    0.16    0.14 
  -1  -2 -10    0.09    0.11 
  -1  -2  -9    0.11    0.13 
  -1  -2  -9   -0.03    0.05 
  -1  -2  -8    0.08    0.07 
  -1  -2  -8    0.06    0.09 
  -1  -2  -7    5.89    0.31 
  -1  -2  -6    3.18    0.21 
  -1  -2  -6    3.37    0.27 
  -1  -2  -5    0.59    0.10 
  -1  -2  -5    0.51    0.11 
  -1  -2  -4    0.57    0.10 
  -1  -2  -4    0.74    0.09 
  -1  -2  -3    0.72    0.10 
   1   2   3    0.62    0.08 
  -1  -2  -2  141.30    1.08 
   1   2   2  142.35    1.12 
  -1  -2  -2  139.70    1.11 
   1   2   1    2.52    0.11 
  -1  -2  -1    2.55    0.16 
  -1  -2   0  197.89    1.00 
  -1  -2   0  198.32    1.42 
  -1  -2   1   19.30    0.48 
  -1  -2   2   10.10    0.40 
  -1  -2   3   54.65    0.97 
  -1  -2   3   54.50    1.03 
   1   2  -4   10.43    0.24 
  -1  -2   4   10.80    0.48 
  -1  -2   5   40.86    0.99 
   1   2  -5   40.02    0.56 
   1   2  -6   46.80    0.70 
  -1  -2   6   47.59    1.15 
   1   2  -7    6.17    0.29 
  -1  -2   7    6.42    0.46 
   1   2  -8    9.49    0.39 
  -1  -2   8    9.16    0.59 
  -1  -2   9    3.27    0.37 
  -1  -2  10    0.14    0.14 
  -1  -2  11    0.43    0.19 
  -1  -2  12    0.24    0.17 
  -1  -1 -14    0.39    0.23 
  -1  -1 -13    0.07    0.15 
  -1  -1 -13    0.06    0.15 
  -1  -1 -12    0.14    0.15 
  -1  -1 -12    0.32    0.17 
  -1  -1 -11   -0.04    0.12 
  -1  -1 -10    0.17    0.09 
   1   1  10    0.20    0.12 
  -1  -1 -10    0.45    0.16 
   1   1   9    2.47    0.30 
  -1  -1  -9    2.41    0.24 
  -1  -1  -9    2.44    0.29 
   1   1   8    0.74    0.17 
  -1  -1  -8    0.96    0.20 
  -1  -1  -8    0.80    0.14 
   1   1   7    2.00    0.24 
  -1  -1  -7    2.55    0.22 
   1   1   6    5.96    0.37 
  -1  -1  -6    5.47    0.35 
  -1  -1  -5    0.49    0.10 
  -1  -1  -5    0.54    0.09 
   1   1   5    0.40    0.11 
   1   1   4    3.36    0.23 
  -1  -1  -4    3.40    0.20 
  -1  -1  -4    3.05    0.21 
  -1  -1  -3   53.06    0.76 
  -1  -1  -3   51.86    0.68 
  -1  -1  -2    8.59    0.25 
   1   1   2    8.30    0.25 
  -1  -1  -1   60.52    0.62 
  -1  -1   1   12.09    0.34 
  -1  -1   1   12.11    0.23 
  -1  -1   1   12.51    0.31 
   1   1  -1   12.85    0.24 
   1   1  -2  279.50    1.20 
  -1  -1   2  281.64    1.86 
  -1  -1   2  275.02    1.69 
  -1  -1   2  280.14    1.20 
   1   1  -2  280.95    1.65 
   1   1  -3    0.02    0.06 
   1   1  -3    0.06    0.05 
  -1  -1   3   -0.02    0.08 
  -1  -1   3    0.06    0.08 
  -1  -1   3    0.19    0.05 
   1   1  -4  120.44    1.54 
  -1  -1   4  114.68    1.39 
   1   1  -4  114.70    1.08 
  -1  -1   5   14.97    0.55 
   1   1  -5   15.60    0.45 
   1   1  -6   13.11    0.46 
  -1  -1   6   13.27    0.58 
   1   1  -7    2.76    0.24 
  -1  -1   7    2.67    0.29 
   1   1  -8    0.12    0.09 
  -1  -1   8   -0.06    0.10 
  -1  -1   9   -0.15    0.13 
   1   1  -9    0.14    0.10 
  -1  -1  10   -0.01    0.11 
   1   1 -11    0.22    0.18 
  -1  -1  11    0.35    0.17 
   1   1 -12    0.02    0.18 
  -1   0 -13    0.10    0.13 
  -1   0 -12    0.26    0.17 
   1   0  12    0.24    0.15 
   1   0  11    0.71    0.21 
  -1   0 -11    0.48    0.15 
  -1   0 -11    0.89    0.23 
  -1   0 -10    2.12    0.27 
   1   0  10    1.52    0.26 
   1   0   9    4.30    0.40 
  -1   0  -9    3.94    0.35 
  -1   0  -8    7.69    0.45 
   1   0   8    7.75    0.50 
   1   0   7    0.59    0.14 
   1   0   6    4.89    0.35 
   1   0   5    0.32    0.11 
  -1   0  -5    0.55    0.12 
   1   0   4   10.04    0.40 
  -1   0  -4   10.81    0.41 
   1   0   3   23.75    0.54 
   1   0   2  103.53    0.94 
  -1   0   1    0.89    0.09 
   1   0  -1    0.85    0.08 
  -1   0   1    1.06    0.07 
  -1   0   1    0.99    0.08 
   1   0  -1    0.95    0.06 
   1   0  -2  162.93    0.95 
  -1   0   2  161.77    1.05 
  -1   0   2  162.48    1.25 
  -1   0   2  162.17    1.20 
   1   0  -2  161.79    1.25 
   1   0  -2  162.36    1.18 
   1   0  -3  118.27    1.25 
   1   0  -3  118.00    1.15 
  -1   0   3  117.54    1.26 
   1   0  -3  119.66    1.10 
  -1   0   3  118.77    1.17 
  -1   0   3  117.47    1.09 
   1   0  -4   67.39    1.07 
  -1   0   4   65.29    0.95 
   1   0  -4   66.06    0.95 
   1   0  -4   65.58    0.97 
   1   0  -5   13.14    0.48 
   1   0  -5   12.47    0.52 
  -1   0   5   12.98    0.48 
   1   0  -5   13.01    0.48 
   1   0  -6   11.38    0.49 
   1   0  -6   10.72    0.47 
  -1   0   6   11.94    0.51 
   1   0  -7    0.19    0.10 
  -1   0   7    0.10    0.10 
  -1   0   8    2.08    0.26 
   1   0  -8    1.97    0.24 
   1   0  -9    2.65    0.39 
  -1   0   9    3.20    0.33 
   1   0  -9    2.70    0.29 
  -1   0  10    0.08    0.11 
   1   0 -10    0.22    0.11 
   1   0 -10    0.07    0.13 
   1   0 -11    0.53    0.22 
   1   0 -12    0.43    0.25 
   1  -1  13    0.03    0.11 
  -1   1 -12    0.18    0.15 
   1  -1  12   -0.08    0.13 
  -1   1 -11    1.14    0.24 
   1  -1  11    0.83    0.22 
   1  -1  10    0.62    0.20 
  -1   1 -10    0.58    0.17 
  -1   1 -10    0.51    0.14 
   1  -1   9   -0.04    0.13 
  -1   1  -9    0.06    0.08 
  -1   1  -9   -0.06    0.09 
  -1   1  -8    0.01    0.11 
   1  -1   8   -0.04    0.11 
  -1   1  -8   -0.04    0.07 
   1  -1   7    2.50    0.28 
  -1   1  -7    2.46    0.26 
   1  -1   6    8.26    0.46 
  -1   1  -6    9.07    0.44 
  -1   1  -5   17.62    0.55 
   1  -1   5   17.19    0.62 
  -1   1  -5   18.55    0.62 
  -1   1  -4   10.43    0.37 
   1  -1   4   10.58    0.44 
   1  -1   3  147.66    1.44 
  -1   1  -3  147.17    1.20 
   1  -1   2   12.18    0.36 
  -1   1  -2   12.34    0.28 
   1  -1   2   12.02    0.29 
   1  -1   1    0.71    0.08 
   1  -1   1    0.57    0.07 
   1  -1   0   25.89    0.43 
   1  -1  -1   56.00    0.73 
  -1   1   1   55.52    0.73 
  -1   1   2   81.95    1.08 
  -1   1   2   82.09    0.55 
   1  -1  -2   82.87    0.74 
   1  -1  -2   80.83    0.55 
   1  -1  -2   80.65    1.01 
  -1   1   2   81.55    0.73 
   1  -1  -3   46.47    0.70 
   1  -1  -3   47.18    0.85 
  -1   1   3   49.11    0.87 
   1  -1  -3   47.09    0.58 
  -1   1   3   47.62    0.58 
  -1   1   4    4.66    0.22 
   1  -1  -4    4.25    0.22 
   1  -1  -4    4.33    0.29 
   1  -1  -4    4.75    0.26 
   1  -1  -5    0.93    0.14 
  -1   1   5    0.94    0.13 
   1  -1  -5    0.82    0.14 
   1  -1  -5    0.74    0.11 
  -1   1   6    2.70    0.23 
   1  -1  -6    2.69    0.22 
   1  -1  -6    2.67    0.26 
  -1   1   7    1.12    0.16 
   1  -1  -7    0.92    0.23 
   1  -1  -7    1.43    0.21 
  -1   1   8    0.67    0.15 
   1  -1  -8    0.64    0.22 
   1  -1  -8    0.44    0.14 
   1  -1  -9    0.44    0.22 
   1  -1  -9    0.20    0.13 
  -1   1   9    0.37    0.10 
   1  -1 -10    0.22    0.13 
   1  -1 -10    0.11    0.14 
  -1   1  10    0.02    0.09 
   1  -1 -11    0.02    0.17 
   1  -1 -12    0.40    0.22 
   1  -2  13    0.24    0.19 
   1  -2  12    0.22    0.13 
  -1   2 -11    0.16    0.14 
   1  -2  11    0.17    0.13 
   1  -2  10    1.05    0.25 
  -1   2 -10    1.28    0.23 
  -1   2  -9    3.03    0.25 
  -1   2  -9    3.08    0.32 
   1  -2   9    3.12    0.38 
   1  -2   8   -0.01    0.13 
  -1   2  -8    0.05    0.09 
  -1   2  -8    0.04    0.06 
   1  -2   7   21.67    0.84 
  -1   2  -7   20.35    0.68 
  -1   2  -6    0.61    0.13 
   1  -2   6    0.47    0.14 
   1  -2   5   39.47    0.98 
  -1   2  -5   38.21    0.75 
  -1   2  -4   40.30    0.56 
  -1   2  -4   39.43    0.67 
   1  -2   4   39.71    0.90 
  -1   2  -3  206.61    1.21 
   1  -2   3  204.73    1.81 
   1  -2   3  197.19    1.31 
  -1   2  -2  403.63    1.66 
   1  -2   2  391.94    1.75 
   1  -2   2  399.41    2.25 
   1  -2   1   16.89    0.38 
   1  -2   1   16.79    0.40 
  -1   2  -1   16.34    0.37 
   1  -2   0  217.38    1.52 
   1  -2   0  214.85    1.13 
   1  -2  -1   47.70    0.80 
  -1   2   1   47.64    0.78 
  -1   2   2    1.92    0.18 
   1  -2  -2    1.91    0.19 
   1  -2  -3    0.36    0.05 
   1  -2  -3    0.38    0.12 
   1  -2  -3    0.39    0.05 
   1  -2  -4    9.36    0.33 
   1  -2  -4   11.18    0.50 
   1  -2  -4   10.17    0.30 
   1  -2  -5    2.08    0.16 
   1  -2  -5    2.19    0.25 
   1  -2  -5    2.05    0.18 
   1  -2  -6   11.32    0.64 
   1  -2  -6    9.64    0.21 
   1  -2  -6   10.89    0.46 
   1  -2  -6   10.19    0.21 
   1  -2  -6   10.97    0.41 
   1  -2  -6   10.28    0.56 
   1  -2  -7    1.06    0.20 
   1  -2  -7    1.36    0.27 
   1  -2  -7    1.18    0.08 
   1  -2  -7    1.30    0.16 
   1  -2  -7    1.18    0.09 
   1  -2  -8    0.16    0.13 
   1  -2  -8    0.02    0.12 
   1  -2  -9   -0.27    0.14 
   1  -2  -9    0.07    0.12 
   1  -2 -10    0.07    0.12 
   1  -2 -10    0.38    0.20 
   1  -2 -11    0.69    0.25 
   1  -2 -11    0.71    0.20 
   1  -2 -12    0.24    0.21 
   1  -3  14   -0.21    0.19 
   1  -3  13    0.06    0.19 
   1  -3  12    0.26    0.16 
   1  -3  11    0.43    0.19 
  -1   3 -10    1.20    0.21 
   1  -3  10    1.10    0.26 
   1  -3   9    1.79    0.32 
  -1   3  -9    1.78    0.23 
  -1   3  -8    5.17    0.25 
  -1   3  -8    5.33    0.24 
  -1   3  -8    5.63    0.36 
   1  -3   8    5.80    0.49 
  -1   3  -7    0.39    0.10 
  -1   3  -7    0.39    0.07 
   1  -3   7    0.48    0.17 
  -1   3  -6    0.04    0.03 
   1  -3   6    0.20    0.13 
   1  -3   5    5.41    0.39 
  -1   3  -5    5.43    0.20 
   1  -3   4   56.58    1.15 
  -1   3  -4   55.52    0.60 
   1  -3   4   55.47    0.75 
   1  -3   3    1.89    0.13 
  -1   3  -3    1.83    0.12 
   1  -3   3    1.66    0.20 
   1  -3   2   11.81    0.34 
  -1   3  -2   11.74    0.34 
   1  -3   2   11.82    0.44 
   1  -3   1    0.06    0.07 
   1  -3   1   -0.13    0.08 
  -1   3  -1   -0.03    0.05 
  -1   3  -1    0.03    0.04 
   1  -3   0   32.87    0.69 
  -1   3   0   34.47    0.47 
   1  -3   0   33.04    0.57 
  -1   3   0   33.48    0.71 
   1  -3  -1    0.31    0.11 
  -1   3   2    0.34    0.11 
   1  -3  -2    0.16    0.10 
  -1   3   2    0.23    0.04 
  -1   3   3   -0.01    0.11 
   1  -3  -3    0.12    0.03 
   1  -3  -3    0.13    0.09 
   1  -3  -3   -0.02    0.10 
   1  -3  -4   30.96    0.91 
   1  -3  -4   30.21    0.92 
   1  -3  -4   30.37    0.50 
   1  -3  -4   29.40    0.49 
   1  -3  -5    7.42    0.48 
   1  -3  -5    7.48    0.31 
   1  -3  -5    6.91    0.48 
   1  -3  -5    7.39    0.28 
   1  -3  -6    6.91    0.34 
   1  -3  -6    6.31    0.29 
   1  -3  -6    5.87    0.46 
   1  -3  -6    5.92    0.48 
   1  -3  -7    0.07    0.07 
   1  -3  -7   -0.11    0.12 
   1  -3  -7    0.02    0.10 
   1  -3  -7    0.06    0.05 
   1  -3  -8    0.02    0.09 
   1  -3  -8    0.14    0.12 
   1  -3  -9    1.02    0.26 
   1  -3  -9    0.93    0.23 
   1  -3 -10    0.34    0.13 
   1  -3 -10    0.39    0.21 
   1  -3 -11    0.76    0.27 
   1  -3 -11    1.26    0.27 
   1  -4  13    0.13    0.14 
   1  -4  12   -0.10    0.18 
   1  -4  11    0.12    0.18 
   1  -4  10    0.35    0.18 
   1  -4   9    0.22    0.18 
   1  -4   8    0.12    0.12 
   1  -4   7    0.23    0.14 
   1  -4   6    0.92    0.22 
  -1   4  -5    0.29    0.04 
   1  -4   5    0.40    0.15 
   1  -4   4   15.25    0.36 
   1  -4   4   13.87    0.62 
  -1   4  -4   14.74    0.34 
   1  -4   4   15.16    0.38 
   1  -4   3    0.17    0.07 
   1  -4   3    0.16    0.12 
  -1   4  -3    0.23    0.10 
  -1   4  -3    0.10    0.05 
   1  -4   2    4.77    0.25 
  -1   4  -2    4.21    0.25 
   1  -4   2    4.30    0.30 
  -1   4  -2    4.87    0.29 
   1  -4   1   20.90    0.59 
  -1   4  -1   20.50    0.57 
   1  -4   1   20.83    0.57 
  -1   4  -1   20.46    0.53 
   1  -4   0    0.06    0.08 
   1  -4   0   -0.04    0.07 
  -1   4   0    0.10    0.04 
  -1   4   0    0.01    0.05 
   1  -4  -1   32.62    0.85 
  -1   4   2    3.60    0.20 
  -1   4   2    3.92    0.30 
   1  -4  -2    4.10    0.33 
   1  -4  -3    6.26    0.43 
  -1   4   3    5.57    0.21 
   1  -4  -4   20.23    0.80 
   1  -4  -4   19.09    0.42 
   1  -4  -4   19.52    0.76 
   1  -4  -5    1.23    0.12 
   1  -4  -5    1.24    0.21 
   1  -4  -5    1.04    0.09 
   1  -4  -5    1.19    0.23 
   1  -4  -6    1.20    0.22 
   1  -4  -6    1.16    0.13 
   1  -4  -6    1.46    0.14 
   1  -4  -6    1.50    0.26 
   1  -4  -7    2.26    0.33 
   1  -4  -7    1.85    0.31 
   1  -4  -8    1.06    0.25 
   1  -4  -8    0.91    0.23 
   1  -4  -9    3.97    0.49 
   1  -4  -9    3.33    0.43 
   1  -4 -10    1.46    0.30 
   1  -4 -10    1.85    0.36 
   1  -4 -11    0.16    0.17 
   1  -4 -11    0.03    0.16 
   1  -4 -12   -0.11    0.13 
   1  -5  12    0.22    0.17 
   1  -5  11    0.27    0.21 
   1  -5  10    0.04    0.14 
   1  -5   9    0.08    0.14 
   1  -5   8    0.41    0.19 
   1  -5   7    0.72    0.24 
   1  -5   6    1.18    0.25 
   1  -5   5    0.12    0.13 
   1  -5   4    0.33    0.08 
  -1   5  -4    0.37    0.07 
   1  -5   4    0.45    0.08 
   1  -5   4    0.45    0.18 
  -1   5  -3   17.92    0.50 
   1  -5   3   18.54    0.70 
   1  -5   3   17.02    0.49 
  -1   5  -2    8.62    0.42 
   1  -5   2    7.81    0.44 
   1  -5   2    8.38    0.37 
  -1   5  -2    8.61    0.38 
   1  -5   1   17.98    0.62 
   1  -5   1   19.28    0.61 
  -1   5  -1   19.47    0.56 
  -1   5  -1   19.19    0.62 
   1  -5   0    4.16    0.28 
  -1   5   0    3.96    0.31 
   1  -5   0    4.40    0.33 
  -1   5   0    4.36    0.23 
  -1   5   1   40.48    0.84 
   1  -5  -1   41.47    1.03 
   1  -5  -2    0.11    0.10 
  -1   5   2    0.35    0.08 
  -1   5   3    1.82    0.15 
   1  -5  -3    2.35    0.29 
   1  -5  -4    0.01    0.12 
  -1   5   4    0.23    0.05 
   1  -5  -5    3.12    0.19 
   1  -5  -5    3.38    0.38 
   1  -5  -6    0.04    0.04 
   1  -5  -6   -0.04    0.11 
   1  -5  -7   11.93    0.75 
   1  -5  -7   11.02    0.73 
   1  -5  -8    1.36    0.29 
   1  -5  -8    0.57    0.21 
   1  -5  -9    0.39    0.21 
   1  -5  -9    0.36    0.20 
   1  -5 -10    0.08    0.18 
   1  -5 -10    0.08    0.15 
   1  -5 -11    0.49    0.20 
   1  -5 -11    0.32    0.22 
   1  -5 -12    0.62    0.23 
   1  -6  12   -0.12    0.19 
   1  -6  11   -0.14    0.18 
   1  -6  10    0.30    0.17 
   1  -6   9    0.31    0.16 
   1  -6   8    0.12    0.13 
   1  -6   7    0.49    0.23 
   1  -6   6    0.14    0.13 
   1  -6   5   -0.01    0.12 
   1  -6   5    0.00    0.04 
   1  -6   5   -0.03    0.04 
   1  -6   4    2.12    0.28 
   1  -6   4    2.69    0.21 
   1  -6   3   -0.05    0.10 
   1  -6   3    0.06    0.06 
   1  -6   2    0.83    0.15 
   1  -6   2    0.60    0.15 
  -1   6  -1    3.23    0.25 
   1  -6   1    3.54    0.30 
   1  -6   1    3.20    0.29 
   1  -6   0    8.03    0.42 
   1  -6   0    8.29    0.47 
  -1   6   1    3.79    0.29 
   1  -6  -1    3.62    0.34 
  -1   6   2    3.28    0.25 
   1  -6  -2    3.62    0.36 
   1  -6  -3    5.85    0.48 
  -1   6   3    5.55    0.30 
  -1   6   4    0.44    0.09 
   1  -6  -4    0.19    0.14 
  -1   6   5   11.73    0.30 
   1  -6  -5   12.90    0.77 
   1  -6  -5   11.97    0.40 
   1  -6  -6    4.13    0.47 
   1  -6  -7    1.70    0.32 
   1  -6  -8    4.79    0.54 
   1  -6  -9    2.01    0.37 
   1  -6  -9    1.60    0.35 
   1  -6 -10    1.27    0.30 
   1  -6 -10    1.43    0.33 
   1  -6 -11    0.20    0.18 
   1  -7  11   -0.03    0.15 
   1  -7  10    0.43    0.22 
   1  -7   9    0.26    0.22 
   1  -7   8    2.27    0.37 
   1  -7   7    0.54    0.21 
   1  -7   6    0.80    0.19 
   1  -7   5    0.10    0.07 
   1  -7   5    0.05    0.03 
   1  -7   5    0.03    0.12 
   1  -7   4    4.27    0.41 
   1  -7   4    4.27    0.28 
   1  -7   3    0.42    0.16 
   1  -7   3    0.22    0.09 
   1  -7   2    3.55    0.31 
   1  -7   2    3.74    0.35 
   1  -7   1    2.05    0.25 
   1  -7   1    2.19    0.27 
   1  -7   0    2.36    0.26 
   1  -7   0    2.24    0.28 
   1  -7  -1    2.86    0.33 
   1  -7  -2    5.74    0.50 
  -1   7   3    0.07    0.07 
   1  -7  -3    0.07    0.14 
   1  -7  -4    2.10    0.33 
   1  -7  -5    2.11    0.35 
   1  -7  -6   14.28    0.89 
   1  -7  -7    0.29    0.14 
   1  -7  -8    1.17    0.31 
   1  -7  -9    1.38    0.34 
   1  -7 -10    1.41    0.36 
   1  -8  10    0.34    0.21 
   1  -8   9    0.45    0.22 
   1  -8   8    0.24    0.18 
   1  -8   7    0.49    0.21 
   1  -8   6    0.09    0.19 
   1  -8   5    4.43    0.47 
   1  -8   5    4.40    0.30 
   1  -8   4    1.63    0.19 
   1  -8   4    1.88    0.32 
   1  -8   3    1.39    0.26 
   1  -8   3    1.29    0.19 
   1  -8   2   -0.04    0.14 
   1  -8   2   -0.22    0.13 
   1  -8   1    0.85    0.20 
   1  -8   1    0.64    0.19 
   1  -8   0    0.89    0.19 
   1  -8   0    0.57    0.17 
   1  -8  -1    0.54    0.15 
   1  -8  -1    0.63    0.16 
   1  -8  -2   -0.06    0.15 
   1  -8  -3    3.78    0.43 
   1  -8  -4    0.04    0.15 
   1  -8  -5    0.43    0.17 
   1  -8  -6    0.68    0.21 
   1  -8  -7    0.41    0.21 
   1  -8  -8    1.07    0.33 
   1  -8  -9    0.22    0.22 
   1  -9   9    0.55    0.26 
   1  -9   8   -0.09    0.18 
   1  -9   7    0.81    0.28 
   1  -9   6    0.12    0.15 
   1  -9   5    0.26    0.15 
   1  -9   4    1.15    0.27 
   1  -9   4    1.02    0.17 
   1  -9   3   -0.05    0.08 
   1  -9   3    0.00    0.14 
   1  -9   2   11.37    0.69 
   1  -9   2   10.85    0.60 
   1  -9   1    0.41    0.16 
   1  -9   1    0.38    0.17 
   1  -9   0    1.21    0.23 
   1  -9   0    1.36    0.26 
   1  -9  -1    7.61    0.50 
   1  -9  -1    6.40    0.54 
   1  -9  -2    2.69    0.29 
   1  -9  -2    2.16    0.35 
   1  -9  -3    5.71    0.56 
   1  -9  -4   -0.01    0.15 
   1  -9  -5   -0.01    0.16 
   1  -9  -6    0.35    0.20 
   1  -9  -7    2.10    0.40 
   1  -9  -8    0.58    0.27 
   1 -10   8    0.11    0.21 
   1 -10   7    0.50    0.22 
   1 -10   6   -0.07    0.17 
   1 -10   5   -0.06    0.12 
   1 -10   4    0.66    0.25 
   1 -10   3    0.66    0.21 
   1 -10   3    0.48    0.15 
   1 -10   2    1.88    0.27 
   1 -10   2    2.51    0.37 
   1 -10   1    0.33    0.17 
   1 -10   1    0.40    0.19 
   1 -10   0    8.17    0.58 
   1 -10   0    8.42    0.63 
   1 -10  -1    2.70    0.39 
   1 -10  -1    3.57    0.38 
   1 -10  -2    0.53    0.15 
   1 -10  -2    0.33    0.17 
   1 -10  -3    0.13    0.15 
   1 -10  -4    0.27    0.20 
   1 -10  -5    0.51    0.25 
   1 -10  -6   -0.04    0.18 
   1 -10  -7    0.06    0.19 
   1 -11   7    0.47    0.23 
   1 -11   6    0.26    0.23 
   1 -11   5    1.69    0.34 
   1 -11   4    1.08    0.29 
   1 -11   3    0.10    0.15 
   1 -11   2    1.73    0.33 
   1 -11   2    2.00    0.31 
   1 -11   1    1.11    0.26 
   1 -11   1    1.30    0.28 
   1 -11   0    0.31    0.15 
   1 -11   0    0.17    0.14 
   1 -11  -1    0.00    0.10 
   1 -11  -1   -0.03    0.13 
   1 -11  -2    0.09    0.15 
   1 -11  -3    0.08    0.16 
   1 -11  -4    0.38    0.22 
   1 -11  -5    0.52    0.26 
   1 -12   5   -0.07    0.13 
   1 -12   4    0.96    0.28 
   1 -12   3   -0.03    0.14 
   1 -12   2    0.52    0.22 
   1 -12   1    1.00    0.24 
   1 -12   1    1.27    0.28 
   1 -12   0    0.39    0.22 
   1 -12   0    1.15    0.26 
   1 -12  -1    0.17    0.18 
   1 -12  -2    0.36    0.22 
   1 -12  -3    0.52    0.22 
   1 -12  -4   -0.10    0.16 
   1 -13   4    0.47    0.25 
   1 -13   3    1.01    0.29 
   1 -13   2    0.13    0.18 
   1 -13   1    0.28    0.18 
   1 -13   0   -0.27    0.20 
   1 -13  -1   -0.02    0.12 
   1 -13  -2    0.36    0.21 
   1 -14  -1    0.13    0.16 
  -2 -14  -2   -0.53    0.23 
  -2 -14  -1    0.78    0.28 
  -2 -13  -4   -0.30    0.23 
  -2 -13  -3    0.20    0.17 
  -2 -13  -2    0.02    0.12 
  -2 -13  -1   -0.13    0.15 
  -2 -13   0    0.24    0.16 
  -2 -13   1    0.62    0.25 
  -2 -13   2    0.33    0.24 
  -2 -12  -5    0.72    0.28 
  -2 -12  -4    0.20    0.19 
  -2 -12  -3    0.40    0.23 
  -2 -12  -2    0.23    0.18 
  -2 -12  -1    0.05    0.13 
  -2 -12   0    0.59    0.20 
  -2 -12   1    0.31    0.21 
  -2 -12   2    0.04    0.18 
  -2 -12   3    2.06    0.40 
  -2 -12   4    0.59    0.25 
  -2 -11  -7    1.47    0.37 
  -2 -11  -6    0.20    0.18 
  -2 -11  -5    0.46    0.25 
  -2 -11  -4    0.20    0.18 
  -2 -11  -3    0.26    0.19 
  -2 -11  -2    0.18    0.16 
  -2 -11  -1    0.02    0.09 
  -2 -11  -1   -0.01    0.14 
  -2 -11   0    1.21    0.25 
  -2 -11   0    1.54    0.27 
  -2 -11   1    1.52    0.26 
  -2 -11   2    1.30    0.33 
  -2 -11   3    1.99    0.38 
  -2 -11   4    0.10    0.13 
  -2 -11   5    1.28    0.35 
  -2 -11   6   -0.20    0.20 
  -2 -10  -8    0.63    0.27 
  -2 -10  -7    0.23    0.17 
  -2 -10  -6   -0.05    0.14 
  -2 -10  -5    0.26    0.19 
  -2 -10  -4    0.27    0.18 
  -2 -10  -3    0.78    0.25 
  -2 -10  -2    0.12    0.10 
  -2 -10  -2   -0.04    0.16 
  -2 -10  -1    3.76    0.36 
  -2 -10  -1    3.46    0.41 
  -2 -10   0    7.26    0.57 
  -2 -10   0    8.77    0.59 
  -2 -10   1    4.81    0.42 
  -2 -10   1    4.87    0.47 
  -2 -10   2    0.88    0.24 
  -2 -10   2    0.92    0.18 
  -2 -10   2    0.90    0.25 
  -2 -10   3    0.57    0.23 
  -2 -10   4    0.52    0.26 
  -2 -10   5   -0.01    0.16 
  -2 -10   6   -0.07    0.18 
  -2 -10   7    0.61    0.28 
  -2  -9  -9    0.46    0.25 
  -2  -9  -8    0.39    0.22 
  -2  -9  -7    0.13    0.17 
  -2  -9  -6    0.92    0.26 
  -2  -9  -5    1.48    0.30 
  -2  -9  -4    1.30    0.29 
  -2  -9  -4    1.23    0.17 
  -2  -9  -3    0.20    0.10 
  -2  -9  -3   -0.04    0.14 
  -2  -9  -2    4.42    0.36 
  -2  -9  -2    4.08    0.42 
  -2  -9  -1    3.59    0.38 
  -2  -9  -1    4.65    0.39 
  -2  -9   0    0.42    0.14 
  -2  -9   0    0.24    0.14 
  -2  -9   1    0.50    0.14 
  -2  -9   1    0.39    0.17 
  -2  -9   1    0.41    0.09 
  -2  -9   2   -0.13    0.13 
  -2  -9   2    0.05    0.06 
  -2  -9   3   -0.05    0.13 
  -2  -9   3    0.12    0.06 
  -2  -9   4   -0.04    0.14 
  -2  -9   5    0.55    0.22 
  -2  -9   6    1.03    0.28 
  -2  -9   7    0.11    0.13 
  -2  -9   8    0.19    0.17 
  -2  -8 -10    0.05    0.17 
  -2  -8  -9   -0.07    0.13 
  -2  -8  -8    3.05    0.47 
  -2  -8  -7    0.43    0.24 
  -2  -8  -6    1.54    0.32 
  -2  -8  -5    8.47    0.66 
  -2  -8  -4    1.31    0.26 
  -2  -8  -4    1.50    0.18 
  -2  -8  -3    1.28    0.18 
  -2  -8  -3    1.73    0.31 
  -2  -8  -2    8.43    0.46 
   2   8   2    8.15    0.41 
  -2  -8  -2    8.67    0.59 
  -2  -8  -1    0.25    0.10 
  -2  -8  -1    0.07    0.11 
  -2  -8   0    4.12    0.37 
  -2  -8   0    3.93    0.36 
  -2  -8   1    7.01    0.45 
  -2  -8   1    7.00    0.32 
  -2  -8   1    8.07    0.54 
  -2  -8   2    2.89    0.28 
  -2  -8   2    2.84    0.34 
  -2  -8   3    0.08    0.14 
  -2  -8   3    0.29    0.10 
  -2  -8   3    0.36    0.19 
  -2  -8   4    3.80    0.44 
  -2  -8   4    3.21    0.43 
  -2  -8   5    1.06    0.27 
  -2  -8   6    1.26    0.31 
  -2  -8   7    0.10    0.15 
  -2  -8   8   -0.39    0.20 
  -2  -8   9   -0.14    0.20 
  -2  -7 -12   -0.08    0.16 
  -2  -7 -11    0.26    0.16 
  -2  -7 -11   -0.03    0.18 
  -2  -7 -10    0.24    0.15 
  -2  -7 -10   -0.11    0.16 
  -2  -7  -9    0.48    0.17 
  -2  -7  -9    0.54    0.21 
  -2  -7  -8    2.31    0.39 
  -2  -7  -8    2.31    0.32 
  -2  -7  -7    0.31    0.19 
  -2  -7  -7    0.13    0.08 
  -2  -7  -6    0.13    0.09 
  -2  -7  -6   -0.06    0.16 
  -2  -7  -5    0.74    0.16 
  -2  -7  -4   19.17    0.74 
   2   7   3    3.38    0.26 
  -2  -7  -3    3.74    0.34 
   2   7   2   -0.01    0.05 
  -2  -7  -2   -0.03    0.09 
  -2  -7  -1    3.05    0.28 
  -2  -7   0    3.47    0.32 
  -2  -7   1   -0.01    0.05 
  -2  -7   1    0.03    0.08 
  -2  -7   1   -0.05    0.09 
  -2  -7   2    1.77    0.20 
  -2  -7   2    2.42    0.31 
  -2  -7   3    3.02    0.21 
  -2  -7   3    3.21    0.36 
  -2  -7   4    0.48    0.05 
  -2  -7   4    0.45    0.19 
  -2  -7   4    0.19    0.14 
  -2  -7   5    0.03    0.11 
  -2  -7   6    0.08    0.20 
  -2  -7   7    0.48    0.25 
  -2  -7   8    0.09    0.15 
  -2  -7   9   -0.20    0.18 
  -2  -7  10   -0.13    0.18 
  -2  -6 -12   -0.38    0.21 
  -2  -6 -12    0.09    0.15 
  -2  -6 -11    0.05    0.12 
  -2  -6 -11    0.01    0.13 
  -2  -6 -10   -0.07    0.17 
  -2  -6 -10   -0.10    0.14 
  -2  -6  -9    0.05    0.10 
  -2  -6  -9    0.19    0.19 
  -2  -6  -8    0.13    0.12 
  -2  -6  -8    0.14    0.08 
  -2  -6  -8    0.06    0.10 
  -2  -6  -7    2.47    0.31 
  -2  -6  -7    2.70    0.25 
  -2  -6  -6   18.77    0.66 
  -2  -6  -6   18.53    0.75 
   2   6   6   17.78    0.64 
  -2  -6  -5    2.37    0.24 
  -2  -6  -4    1.13    0.18 
  -2  -6  -3    0.93    0.17 
   2   6   3    0.92    0.13 
   2   6   2    0.80    0.11 
  -2  -6  -2    0.87    0.16 
  -2  -6  -1    3.38    0.28 
  -2  -6   0    4.81    0.35 
  -2  -6   1    2.09    0.25 
  -2  -6   1    1.99    0.14 
  -2  -6   2    0.00    0.11 
  -2  -6   3    0.31    0.14 
  -2  -6   3    0.38    0.07 
  -2  -6   4   -0.01    0.12 
  -2  -6   4    0.33    0.16 
  -2  -6   5    0.08    0.12 
  -2  -6   6   -0.01    0.12 
  -2  -6   7    2.30    0.36 
  -2  -6   8   -0.04    0.14 
  -2  -6   9    0.22    0.19 
  -2  -6  10   -0.03    0.15 
  -2  -6  11   -0.18    0.19 
  -2  -5 -13    0.00    0.13 
  -2  -5 -12    0.31    0.19 
  -2  -5 -12    0.09    0.16 
  -2  -5 -11    0.17    0.16 
  -2  -5 -11   -0.04    0.13 
  -2  -5 -10    0.77    0.23 
  -2  -5 -10    1.10    0.30 
  -2  -5  -9    0.33    0.15 
  -2  -5  -9    0.03    0.14 
  -2  -5  -8    2.12    0.21 
  -2  -5  -8    1.72    0.28 
  -2  -5  -7    1.29    0.23 
  -2  -5  -7    1.48    0.18 
  -2  -5  -6    3.39    0.27 
   2   5   6    3.26    0.26 
  -2  -5  -6    3.52    0.33 
   2   5   5    2.32    0.22 
  -2  -5  -5    1.79    0.20 
  -2  -5  -5    2.06    0.23 
  -2  -5  -4    0.07    0.06 
   2   5   4    0.03    0.07 
  -2  -5  -4    0.14    0.08 
  -2  -5  -3    6.02    0.37 
   2   5   3    6.07    0.36 
   2   5   2    7.95    0.42 
   2   5   2    7.22    0.28 
  -2  -5  -2    7.49    0.42 
  -2  -5  -1    0.09    0.11 
  -2  -5   0   11.97    0.51 
  -2  -5   0   11.19    0.37 
  -2  -5   1    0.25    0.06 
  -2  -5   1    0.27    0.12 
  -2  -5   2    2.59    0.29 
  -2  -5   3    0.03    0.10 
  -2  -5   3    0.04    0.03 
  -2  -5   4    0.49    0.16 
  -2  -5   4    0.39    0.13 
  -2  -5   5    7.12    0.55 
  -2  -5   5    7.55    0.54 
  -2  -5   6    3.37    0.39 
  -2  -5   7    2.16    0.33 
  -2  -5   8    0.13    0.18 
  -2  -5   9    0.32    0.18 
  -2  -5  10    0.17    0.19 
  -2  -5  11    0.67    0.24 
  -2  -5  12   -0.08    0.15 
  -2  -4 -13    0.25    0.15 
  -2  -4 -13   -0.03    0.13 
  -2  -4 -13   -0.04    0.11 
  -2  -4 -12    0.07    0.14 
  -2  -4 -12    0.21    0.15 
  -2  -4 -11    0.34    0.18 
  -2  -4 -11    0.52    0.19 
  -2  -4 -10    0.12    0.14 
  -2  -4 -10   -0.10    0.11 
  -2  -4  -9    0.83    0.20 
  -2  -4  -9    0.62    0.22 
  -2  -4  -9    0.56    0.12 
  -2  -4  -8   15.25    0.56 
  -2  -4  -8   16.05    0.80 
  -2  -4  -7    0.79    0.20 
  -2  -4  -7    0.89    0.14 
  -2  -4  -6    7.20    0.37 
   2   4   6    7.29    0.38 
  -2  -4  -6    6.84    0.45 
  -2  -4  -5    2.57    0.22 
   2   4   5    2.70    0.23 
  -2  -4  -5    2.63    0.25 
  -2  -4  -4    1.97    0.19 
   2   4   4    1.91    0.19 
  -2  -4  -4    1.59    0.17 
  -2  -4  -3    4.24    0.23 
   2   4   3    4.77    0.30 
  -2  -4  -3    4.38    0.29 
  -2  -4  -2  155.00    1.71 
   2   4   2  159.28    1.72 
   2   4   2  156.44    1.15 
  -2  -4  -1   58.39    1.08 
   2   4   1   60.55    1.08 
  -2  -4   0   25.63    0.73 
  -2  -4   0   25.10    0.50 
  -2  -4   1    1.95    0.22 
  -2  -4   2   23.19    0.76 
  -2  -4   3    4.32    0.17 
  -2  -4   3    4.88    0.38 
  -2  -4   4    0.07    0.12 
  -2  -4   4    0.04    0.11 
  -2  -4   5   10.33    0.61 
  -2  -4   5   11.28    0.65 
  -2  -4   6    0.35    0.15 
  -2  -4   7    0.14    0.17 
  -2  -4   8    0.36    0.17 
  -2  -4   9    1.01    0.26 
  -2  -4  10    2.16    0.37 
  -2  -4  11    1.47    0.33 
  -2  -4  12    0.64    0.25 
  -2  -3 -13    0.39    0.21 
  -2  -3 -13    0.27    0.18 
  -2  -3 -13    0.05    0.14 
  -2  -3 -12    0.02    0.11 
  -2  -3 -12   -0.08    0.11 
  -2  -3 -12   -0.14    0.13 
  -2  -3 -11    0.05    0.13 
  -2  -3 -11    0.37    0.18 
  -2  -3 -10    4.91    0.49 
  -2  -3 -10    4.91    0.52 
  -2  -3  -9    0.70    0.14 
  -2  -3  -9    1.11    0.25 
  -2  -3  -8    4.08    0.30 
  -2  -3  -7   -0.06    0.07 
  -2  -3  -6    1.04    0.15 
   2   3   5    1.83    0.18 
  -2  -3  -5    1.82    0.20 
  -2  -3  -5    1.75    0.18 
  -2  -3  -4   14.61    0.48 
   2   3   4   14.88    0.49 
  -2  -3  -4   15.36    0.51 
   2   3   3   29.09    0.67 
  -2  -3  -3   28.73    0.66 
  -2  -3  -3   28.23    0.56 
  -2  -3  -2    6.24    0.31 
   2   3   2    6.32    0.32 
  -2  -3  -2    6.43    0.20 
  -2  -3  -1   13.73    0.41 
  -2  -3  -1   14.10    0.48 
  -2  -3   0    7.21    0.36 
  -2  -3   0    6.94    0.24 
  -2  -3   1    2.70    0.24 
  -2  -3   1    2.49    0.23 
   2   3  -1    2.65    0.13 
  -2  -3   2    0.24    0.06 
  -2  -3   2    0.28    0.13 
   2   3  -2    0.35    0.10 
  -2  -3   3    0.04    0.04 
  -2  -3   3    0.06    0.09 
   2   3  -3    0.00    0.09 
  -2  -3   4    1.25    0.09 
  -2  -3   4    1.19    0.20 
  -2  -3   4    1.02    0.19 
  -2  -3   5    3.30    0.32 
  -2  -3   5    3.05    0.34 
   2   3  -6    7.85    0.26 
  -2  -3   6    9.40    0.56 
   2   3  -7    3.20    0.18 
  -2  -3   7    3.32    0.36 
  -2  -3   8    3.99    0.42 
  -2  -3   9    2.45    0.35 
  -2  -3  10    4.05    0.46 
  -2  -3  11    0.47    0.22 
  -2  -2 -14    0.16    0.14 
  -2  -2 -13    0.00    0.15 
  -2  -2 -13    0.13    0.17 
  -2  -2 -12    0.53    0.20 
  -2  -2 -12    0.20    0.16 
  -2  -2 -12    0.46    0.22 
  -2  -2 -11    2.02    0.35 
  -2  -2 -11    1.44    0.27 
  -2  -2 -10    0.07    0.16 
  -2  -2 -10   -0.05    0.06 
  -2  -2  -9    0.03    0.07 
  -2  -2  -8    0.38    0.10 
  -2  -2  -7    4.28    0.30 
  -2  -2  -6    6.91    0.36 
  -2  -2  -5    9.48    0.39 
  -2  -2  -5    9.95    0.44 
   2   2   4    0.11    0.06 
  -2  -2  -4    0.14    0.08 
  -2  -2  -4    0.07    0.07 
  -2  -2  -3  104.38    1.19 
   2   2   3  106.73    1.20 
  -2  -2  -2   10.65    0.37 
  -2  -2  -1  124.64    1.25 
   2   2   1  123.65    1.13 
  -2  -2  -1  125.63    1.12 
  -2  -2   0   44.36    0.77 
   2   2   0   45.06    0.59 
  -2  -2   1    8.46    0.28 
  -2  -2   1    9.33    0.37 
  -2  -2   2    7.79    0.26 
   2   2  -2    7.62    0.35 
  -2  -2   2    7.73    0.39 
   2   2  -3   22.06    0.46 
  -2  -2   3   21.70    0.70 
   2   2  -3   22.40    0.63 
  -2  -2   3   21.96    0.43 
  -2  -2   3   21.73    0.64 
  -2  -2   4   58.19    1.12 
   2   2  -4   57.35    0.79 
   2   2  -4   59.39    1.08 
  -2  -2   4   59.00    0.76 
  -2  -2   4   58.76    1.22 
   2   2  -5    4.28    0.23 
  -2  -2   5    4.78    0.39 
  -2  -2   5    4.23    0.33 
  -2  -2   6    0.32    0.15 
   2   2  -6    0.31    0.07 
  -2  -2   7    4.00    0.37 
   2   2  -7    3.88    0.26 
  -2  -2   8    0.17    0.12 
   2   2  -8    0.13    0.07 
  -2  -2   9    3.50    0.38 
   2   2 -10   -0.12    0.15 
  -2  -2  10    0.16    0.14 
  -2  -2  11    0.30    0.14 
   2   2 -11    0.44    0.24 
  -2  -1 -14    0.13    0.15 
  -2  -1 -13    1.20    0.30 
  -2  -1 -12    0.78    0.20 
  -2  -1 -12    0.52    0.22 
  -2  -1 -11    0.40    0.16 
  -2  -1 -11    0.48    0.20 
  -2  -1 -10    0.35    0.14 
  -2  -1 -10    0.63    0.20 
  -2  -1  -9    1.93    0.24 
   2   1   9    2.36    0.31 
  -2  -1  -9    2.41    0.33 
   2   1   8   -0.09    0.12 
  -2  -1  -8    0.11    0.07 
  -2  -1  -7    1.72    0.20 
   2   1   7    2.01    0.26 
  -2  -1  -6    1.62    0.19 
   2   1   6    1.28    0.20 
  -2  -1  -5    0.11    0.06 
  -2  -1  -5    0.30    0.10 
  -2  -1  -5    0.19    0.10 
  -2  -1  -4   17.85    0.51 
  -2  -1  -4   17.80    0.54 
  -2  -1  -3   17.96    0.48 
   2   1   3   18.16    0.49 
   2   1   2  542.15    2.51 
  -2  -1  -2  541.44    2.45 
   2   1   1    1.55    0.13 
  -2  -1  -1    1.66    0.15 
  -2  -1   0  111.88    1.06 
  -2  -1   0  114.25    0.78 
  -2  -1   1   19.29    0.45 
   2   1  -1   19.36    0.45 
  -2  -1   1   18.62    0.43 
   2   1  -1   19.09    0.45 
   2   1  -1   18.90    0.42 
   2   1  -2  111.36    1.15 
  -2  -1   2  112.19    1.04 
   2   1  -2  110.81    1.10 
  -2  -1   2  110.70    1.15 
  -2  -1   2  110.43    1.32 
  -2  -1   3    6.78    0.36 
  -2  -1   3    6.43    0.32 
   2   1  -3    6.71    0.30 
  -2  -1   3    6.77    0.28 
   2   1  -3    6.35    0.27 
   2   1  -4    5.80    0.30 
  -2  -1   4    5.79    0.33 
   2   1  -4    5.57    0.28 
  -2  -1   4    6.30    0.30 
  -2  -1   4    5.92    0.37 
  -2  -1   5    1.16    0.17 
   2   1  -5    0.89    0.12 
   2   1  -5    1.04    0.14 
  -2  -1   6    0.07    0.10 
   2   1  -6   -0.04    0.07 
   2   1  -6    0.07    0.06 
  -2  -1   7    0.95    0.18 
   2   1  -7    1.01    0.16 
   2   1  -8   -0.01    0.12 
  -2  -1   8   -0.10    0.12 
   2   1  -8   -0.01    0.06 
  -2  -1   9    0.31    0.15 
   2   1  -9    0.12    0.17 
   2   1 -10    0.13    0.18 
  -2  -1  10    0.14    0.11 
   2   1 -11    0.08    0.16 
  -2   0 -13   -0.06    0.11 
   2   0  12    1.33    0.30 
  -2   0 -12    1.05    0.26 
  -2   0 -11    1.18    0.26 
   2   0  11    1.11    0.25 
  -2   0 -11    1.40    0.24 
  -2   0 -11    1.99    0.27 
   2   0  10    0.11    0.13 
  -2   0 -10    0.17    0.12 
  -2   0  -9    0.86    0.21 
   2   0   9    0.89    0.20 
   2   0   8    1.77    0.27 
  -2   0  -8    1.82    0.27 
   2   0   7    8.62    0.50 
  -2   0  -7    8.81    0.50 
  -2   0  -6    6.74    0.41 
   2   0   6    5.92    0.39 
  -2   0  -5   21.78    0.67 
  -2   0  -5   20.97    0.65 
   2   0   5   21.58    0.68 
  -2   0  -4   61.55    1.02 
   2   0   4   64.12    1.06 
   2   0   3   27.64    0.63 
   2   0   3   29.13    0.62 
   2   0   2    3.02    0.19 
  -2   0  -2    3.33    0.20 
  -2   0  -1    9.57    0.30 
   2   0   1    8.83    0.32 
   2   0   0  394.67    2.10 
  -2   0   0  393.45    1.77 
  -2   0   1    0.79    0.10 
   2   0  -1    0.76    0.11 
  -2   0   1    0.86    0.11 
   2   0  -1    0.72    0.08 
  -2   0   1    0.78    0.09 
  -2   0   2    4.30    0.24 
   2   0  -2    4.64    0.25 
  -2   0   2    4.53    0.19 
   2   0  -2    4.64    0.20 
  -2   0   2    4.61    0.25 
  -2   0   3   47.72    0.87 
  -2   0   3   47.92    0.72 
   2   0  -3   48.22    0.84 
  -2   0   3   49.45    0.86 
   2   0  -3   49.25    0.67 
   2   0  -4    3.33    0.26 
  -2   0   4    3.08    0.24 
   2   0  -4    2.79    0.23 
  -2   0   4    3.32    0.22 
   2   0  -4    3.40    0.20 
  -2   0   4    3.40    0.27 
  -2   0   5    5.33    0.31 
   2   0  -5    5.41    0.42 
   2   0  -5    5.60    0.27 
   2   0  -5    5.44    0.34 
   2   0  -6    2.00    0.18 
  -2   0   6    1.72    0.20 
   2   0  -6    1.76    0.21 
   2   0  -6    1.58    0.26 
   2   0  -7    0.09    0.13 
   2   0  -7    0.46    0.10 
  -2   0   7    0.34    0.12 
   2   0  -7    0.25    0.11 
   2   0  -8    1.27    0.20 
  -2   0   8    1.36    0.21 
   2   0  -8    1.23    0.27 
   2   0  -9    0.38    0.20 
   2   0  -9    0.30    0.10 
  -2   0   9    0.35    0.14 
   2   0 -10    0.10    0.17 
   2   0 -11    0.33    0.23 
   2  -1  14    0.43    0.23 
  -2   1 -13   -0.04    0.13 
   2  -1  13    0.04    0.14 
   2  -1  12    0.22    0.17 
  -2   1 -12   -0.06    0.10 
  -2   1 -11    0.29    0.15 
   2  -1  11    0.42    0.21 
  -2   1 -10   10.00    0.64 
   2  -1  10   10.53    0.69 
  -2   1  -9    0.01    0.10 
   2  -1   9    0.18    0.14 
   2  -1   8    3.24    0.36 
  -2   1  -8    3.53    0.34 
   2  -1   7    4.45    0.38 
  -2   1  -7    3.92    0.33 
  -2   1  -6    0.78    0.15 
   2  -1   6    0.81    0.17 
   2  -1   5   15.11    0.59 
  -2   1  -5   14.99    0.53 
   2  -1   4    1.29    0.18 
  -2   1  -4    0.93    0.10 
   2  -1   4    1.23    0.15 
   2  -1   3    0.15    0.07 
   2  -1   3    0.06    0.10 
  -2   1  -3   -0.05    0.08 
   2  -1   2  438.36    2.23 
  -2   1  -2  443.89    2.30 
   2  -1   2  437.78    2.25 
   2  -1   1   68.29    0.74 
  -2   1  -1   68.10    0.74 
   2  -1   1   69.32    0.92 
   2  -1   0    0.97    0.12 
  -2   1   0    1.08    0.08 
  -2   1   0    0.92    0.09 
   2  -1  -1    4.89    0.27 
   2  -1  -1    5.11    0.18 
  -2   1   1    5.47    0.18 
  -2   1   1    5.01    0.27 
  -2   1   2    0.05    0.08 
  -2   1   2    0.00    0.02 
   2  -1  -2    0.01    0.03 
  -2   1   2    0.01    0.02 
  -2   1   2    0.02    0.05 
   2  -1  -2    0.08    0.08 
  -2   1   2    0.02    0.06 
   2  -1  -3   10.30    0.44 
  -2   1   3   10.30    0.45 
  -2   1   3   11.08    0.27 
   2  -1  -3   10.03    0.22 
  -2   1   3   10.35    0.37 
   2  -1  -4    4.95    0.17 
   2  -1  -4    5.09    0.34 
  -2   1   4    4.80    0.32 
  -2   1   4    5.44    0.24 
  -2   1   5    1.29    0.14 
   2  -1  -5    1.22    0.19 
   2  -1  -5    1.24    0.17 
   2  -1  -5    1.31    0.10 
   2  -1  -6    0.16    0.05 
   2  -1  -6    0.06    0.09 
   2  -1  -6    0.08    0.11 
  -2   1   6    0.17    0.08 
  -2   1   7    0.07    0.08 
   2  -1  -7    0.07    0.13 
   2  -1  -7    0.07    0.04 
   2  -1  -7    0.04    0.09 
  -2   1   8    0.26    0.12 
   2  -1  -8    0.07    0.12 
   2  -1  -8   -0.06    0.08 
  -2   1   9    0.08    0.10 
   2  -1  -9    0.12    0.09 
   2  -1  -9    0.15    0.13 
   2  -1 -10    0.06    0.09 
   2  -1 -10    0.26    0.22 
   2  -1 -11    0.64    0.26 
   2  -2  14   -0.13    0.17 
   2  -2  13   -0.21    0.17 
  -2   2 -12    0.82    0.21 
   2  -2  12    1.41    0.32 
   2  -2  11    0.28    0.20 
  -2   2 -11    0.16    0.09 
  -2   2 -10    0.68    0.13 
  -2   2 -10    0.96    0.20 
   2  -2  10    0.53    0.20 
  -2   2  -9    0.27    0.12 
   2  -2   9    0.31    0.15 
   2  -2   8    5.58    0.47 
  -2   2  -8    5.94    0.41 
  -2   2  -7    1.58    0.20 
   2  -2   7    1.78    0.25 
  -2   2  -6    0.08    0.07 
   2  -2   6    0.02    0.10 
   2  -2   5   33.59    0.92 
  -2   2  -5   33.65    0.69 
   2  -2   4  101.18    1.46 
  -2   2  -4  104.03    1.17 
   2  -2   4  100.53    1.20 
   2  -2   3    5.45    0.33 
   2  -2   3    6.36    0.28 
  -2   2  -3    6.16    0.28 
   2  -2   2    4.25    0.25 
  -2   2  -2    4.59    0.24 
   2  -2   2    4.16    0.25 
  -2   2  -1   74.01    0.85 
   2  -2   1   74.99    0.85 
   2  -2   1   76.93    1.01 
  -2   2   0   33.51    0.45 
   2  -2   0   33.55    0.44 
   2  -2   0   33.80    0.71 
  -2   2   1    5.51    0.31 
   2  -2  -1    4.20    0.27 
  -2   2   2    1.26    0.10 
   2  -2  -2    1.28    0.18 
  -2   2   2    1.57    0.18 
  -2   2   3   25.14    0.75 
   2  -2  -3   24.34    0.74 
  -2   2   3   24.48    0.48 
   2  -2  -4   25.49    0.81 
   2  -2  -5    1.32    0.23 
   2  -2  -5    2.75    0.29 
   2  -2  -6    0.14    0.12 
   2  -2  -6    0.09    0.10 
   2  -2  -7   -0.10    0.12 
   2  -2  -7   -0.30    0.18 
   2  -2  -8   -0.04    0.14 
   2  -2  -8   -0.09    0.11 
   2  -2  -9    0.29    0.21 
   2  -2  -9    0.03    0.09 
   2  -2 -10    0.42    0.16 
   2  -2 -10    0.29    0.20 
   2  -2 -11    0.53    0.24 
   2  -3  13    0.12    0.16 
   2  -3  12   -0.03    0.13 
   2  -3  11    0.14    0.15 
   2  -3  10    2.23    0.37 
   2  -3   9   -0.08    0.14 
  -2   3  -8    0.05    0.05 
   2  -3   8    0.01    0.12 
  -2   3  -7    2.45    0.20 
   2  -3   7    2.72    0.33 
   2  -3   6   19.87    0.80 
  -2   3  -6   19.87    0.53 
   2  -3   5    5.58    0.30 
  -2   3  -5    5.72    0.28 
   2  -3   5    5.62    0.41 
   2  -3   4   16.43    0.63 
  -2   3  -4   16.59    0.45 
   2  -3   4   16.27    0.48 
  -2   3  -3    3.52    0.22 
   2  -3   3    3.34    0.23 
   2  -3   3    3.78    0.29 
   2  -3   2   29.16    0.67 
  -2   3  -2   30.12    0.66 
  -2   3  -2   31.41    0.70 
   2  -3   2   30.24    0.69 
  -2   3  -1    0.71    0.10 
   2  -3   1    0.89    0.12 
   2  -3   1    0.66    0.12 
  -2   3  -1    0.62    0.12 
   2  -3   0    0.14    0.11 
   2  -3   0    0.07    0.06 
   2  -3  -1   19.42    0.31 
   2  -3  -1   19.47    0.65 
   2  -3  -2   38.10    0.95 
   2  -3  -3    0.17    0.13 
   2  -3  -4    0.08    0.10 
   2  -3  -5    1.98    0.27 
   2  -3  -5    1.76    0.26 
   2  -3  -6    0.45    0.15 
   2  -3  -6    0.16    0.10 
   2  -3  -7    0.56    0.17 
   2  -3  -7    0.36    0.19 
   2  -3  -8    1.98    0.34 
   2  -3  -8    1.62    0.29 
   2  -3  -9    0.93    0.26 
   2  -3  -9    0.68    0.22 
   2  -3 -10    0.24    0.22 
   2  -3 -10    0.29    0.15 
   2  -3 -11    0.13    0.13 
   2  -3 -11    0.06    0.12 
   2  -4  13    0.08    0.18 
   2  -4  12    0.68    0.27 
   2  -4  11    0.11    0.14 
   2  -4  10   -0.03    0.13 
   2  -4   9    0.99    0.25 
   2  -4   8    0.66    0.21 
   2  -4   7    1.52    0.27 
  -2   4  -7    1.51    0.13 
   2  -4   6    6.16    0.47 
  -2   4  -6    6.09    0.26 
   2  -4   5   11.52    0.60 
  -2   4  -5   12.05    0.38 
   2  -4   5   11.70    0.42 
   2  -4   4   88.77    1.17 
  -2   4  -4   88.67    1.08 
   2  -4   4   85.76    1.51 
  -2   4  -3    1.21    0.15 
   2  -4   3    1.10    0.20 
   2  -4   3    0.89    0.16 
  -2   4  -2   51.33    0.93 
   2  -4   2   50.47    0.93 
   2  -4   2   51.15    0.98 
  -2   4  -2   50.49    0.99 
   2  -4   1    9.63    0.39 
   2  -4   1    9.21    0.43 
  -2   4  -1    9.90    0.44 
  -2   4   0   57.41    1.14 
   2  -4   0   55.66    1.10 
   2  -4   0   55.85    0.82 
   2  -4  -1    6.52    0.24 
   2  -4  -1    6.77    0.43 
  -2   4   1    5.53    0.15 
   2  -4  -2    0.03    0.03 
   2  -4  -2    0.03    0.10 
  -2   4   3   16.59    0.29 
   2  -4  -3   18.87    0.77 
   2  -4  -4   -0.02    0.11 
   2  -4  -5    0.06    0.13 
   2  -4  -5    0.05    0.13 
   2  -4  -6    0.62    0.22 
   2  -4  -6    0.35    0.16 
   2  -4  -7    0.92    0.24 
   2  -4  -7    0.73    0.23 
   2  -4  -8   -0.10    0.13 
   2  -4  -8    0.11    0.14 
   2  -4  -9    0.44    0.20 
   2  -4  -9    0.92    0.25 
   2  -4 -10    0.24    0.19 
   2  -4 -10   -0.01    0.13 
   2  -4 -11    0.09    0.11 
   2  -5  12    0.18    0.18 
   2  -5  11    0.27    0.18 
   2  -5  10    0.12    0.15 
   2  -5   9    0.63    0.22 
   2  -5   8    0.27    0.20 
  -2   5  -7    4.50    0.20 
   2  -5   7    5.04    0.47 
  -2   5  -6    8.99    0.32 
   2  -5   6    8.98    0.38 
   2  -5   6    9.51    0.61 
   2  -5   5   -0.03    0.13 
   2  -5   5    0.17    0.07 
   2  -5   5    0.15    0.07 
  -2   5  -5    0.07    0.05 
  -2   5  -4    6.98    0.34 
   2  -5   4    7.02    0.37 
   2  -5   4    7.16    0.48 
   2  -5   3    4.53    0.30 
  -2   5  -3    3.92    0.27 
   2  -5   3    3.85    0.33 
   2  -5   2    3.54    0.28 
   2  -5   2    3.51    0.29 
  -2   5  -2    3.63    0.28 
  -2   5  -2    3.65    0.27 
   2  -5   1    6.27    0.38 
   2  -5   1    5.60    0.33 
  -2   5  -1    6.33    0.31 
   2  -5   0    1.68    0.23 
   2  -5   0    1.69    0.18 
  -2   5   0    1.70    0.14 
   2  -5  -1   39.81    1.09 
   2  -5  -1   41.75    0.73 
  -2   5   2   11.09    0.39 
   2  -5  -2   10.64    0.58 
   2  -5  -2   10.32    0.32 
   2  -5  -3    1.78    0.11 
  -2   5   3    1.91    0.14 
   2  -5  -3    2.41    0.32 
   2  -5  -4    3.97    0.41 
   2  -5  -5    2.23    0.33 
   2  -5  -6    0.34    0.18 
   2  -5  -7    0.83    0.24 
   2  -5  -7    0.76    0.24 
   2  -5  -8   -0.02    0.13 
   2  -5  -8   -0.01    0.14 
   2  -5  -9    0.11    0.13 
   2  -5  -9    0.04    0.12 
   2  -5 -10    0.56    0.26 
   2  -5 -10    0.50    0.22 
   2  -5 -11   -0.12    0.12 
   2  -6  12    0.17    0.19 
   2  -6  11    0.01    0.14 
   2  -6  10    0.13    0.16 
   2  -6   9    0.66    0.23 
   2  -6   8    3.01    0.42 
   2  -6   7    1.60    0.30 
   2  -6   6    4.45    0.26 
   2  -6   6    4.75    0.46 
  -2   6  -6    4.87    0.25 
   2  -6   5    0.28    0.09 
   2  -6   5    0.18    0.17 
   2  -6   5    0.30    0.10 
  -2   6  -5    0.38    0.10 
   2  -6   4    6.26    0.37 
  -2   6  -4    5.66    0.33 
   2  -6   4    5.97    0.46 
   2  -6   3    0.42    0.11 
  -2   6  -3    0.35    0.11 
   2  -6   2   12.47    0.58 
   2  -6   2   12.44    0.55 
  -2   6  -2   12.38    0.52 
  -2   6  -1   10.80    0.44 
   2  -6   1    9.95    0.52 
   2  -6   1   10.68    0.51 
  -2   6   0    9.31    0.34 
   2  -6   0    9.14    0.53 
   2  -6   0    9.01    0.43 
   2  -6  -1    6.00    0.46 
   2  -6  -1    6.22    0.33 
   2  -6  -2    0.74    0.11 
  -2   6   2    1.10    0.15 
   2  -6  -2    0.92    0.20 
   2  -6  -3    1.04    0.11 
  -2   6   3    1.00    0.12 
   2  -6  -3    1.08    0.24 
  -2   6   4    0.27    0.05 
   2  -6  -4    0.21    0.05 
   2  -6  -4    0.15    0.04 
   2  -6  -4    0.45    0.18 
   2  -6  -5    0.01    0.15 
   2  -6  -6    4.80    0.51 
   2  -6  -7    0.13    0.17 
   2  -6  -8    4.35    0.53 
   2  -6  -9    1.33    0.32 
   2  -6 -10    0.77    0.26 
   2  -7  11    0.01    0.17 
   2  -7  10    0.12    0.16 
   2  -7   9    0.36    0.16 
   2  -7   8    0.50    0.21 
   2  -7   7    0.18    0.18 
   2  -7   6   -0.04    0.16 
   2  -7   5    0.08    0.09 
   2  -7   5    0.33    0.18 
  -2   7  -5    0.13    0.06 
   2  -7   4   13.39    0.71 
   2  -7   4   13.57    0.57 
  -2   7  -4   13.22    0.55 
   2  -7   3    8.47    0.47 
   2  -7   3    8.90    0.56 
   2  -7   2    2.61    0.31 
   2  -7   2    2.99    0.30 
   2  -7   1    1.46    0.24 
  -2   7  -1    1.31    0.17 
   2  -7   1    1.49    0.22 
  -2   7   0    6.24    0.30 
   2  -7   0    5.25    0.36 
   2  -7   0    6.58    0.49 
   2  -7  -1    6.86    0.52 
   2  -7  -1    6.28    0.37 
   2  -7  -2    0.14    0.08 
  -2   7   2    0.12    0.07 
   2  -7  -2    0.03    0.16 
  -2   7   3    0.56    0.10 
   2  -7  -3    0.68    0.11 
   2  -7  -3    0.52    0.19 
   2  -7  -4    4.96    0.51 
   2  -7  -4    4.92    0.24 
   2  -7  -5    0.02    0.14 
   2  -7  -6    1.19    0.31 
   2  -7  -7    1.46    0.32 
   2  -7  -8   -0.14    0.15 
   2  -7  -9    1.17    0.32 
   2  -8  10    0.17    0.18 
   2  -8   9    0.38    0.24 
   2  -8   8    0.50    0.22 
   2  -8   7   -0.01    0.16 
   2  -8   6   -0.04    0.13 
   2  -8   5    3.00    0.28 
   2  -8   5    3.10    0.39 
   2  -8   4    1.11    0.22 
   2  -8   4    1.49    0.22 
   2  -8   3    0.19    0.10 
   2  -8   3    0.50    0.17 
   2  -8   2    3.38    0.34 
   2  -8   2    3.67    0.37 
   2  -8   1    4.26    0.41 
  -2   8  -1    3.71    0.29 
   2  -8   1    4.17    0.37 
   2  -8   0    4.49    0.42 
   2  -8   0    4.73    0.37 
   2  -8  -1    2.22    0.25 
   2  -8  -1    2.54    0.35 
   2  -8  -2    5.60    0.53 
   2  -8  -2    5.49    0.35 
   2  -8  -3    5.69    0.33 
   2  -8  -3    6.24    0.58 
   2  -8  -4    0.34    0.20 
   2  -8  -5    1.22    0.29 
   2  -8  -6    0.25    0.17 
   2  -8  -7    0.11    0.18 
   2  -8  -8   -0.14    0.17 
   2  -9   9    0.12    0.21 
   2  -9   8    0.39    0.21 
   2  -9   7    0.47    0.23 
   2  -9   6    0.13    0.16 
   2  -9   5    0.69    0.24 
   2  -9   4    4.45    0.47 
   2  -9   4    4.27    0.37 
   2  -9   3    1.72    0.29 
   2  -9   3    1.90    0.27 
   2  -9   2    0.18    0.16 
   2  -9   2    0.03    0.10 
   2  -9   1    0.43    0.17 
   2  -9   1    0.82    0.20 
   2  -9   0   -0.04    0.10 
   2  -9   0    0.02    0.13 
   2  -9  -1    1.54    0.22 
   2  -9  -1    1.29    0.28 
   2  -9  -2    0.38    0.11 
   2  -9  -2    0.48    0.20 
   2  -9  -3    0.07    0.16 
   2  -9  -4   -0.07    0.19 
   2  -9  -5    0.28    0.16 
   2  -9  -6    0.02    0.16 
   2  -9  -7    0.05    0.13 
   2 -10   8    0.55    0.24 
   2 -10   7    0.73    0.28 
   2 -10   6    1.84    0.36 
   2 -10   5    0.03    0.14 
   2 -10   4    0.91    0.24 
   2 -10   4    0.46    0.15 
   2 -10   3    0.06    0.14 
   2 -10   3   -0.26    0.17 
   2 -10   2    0.45    0.16 
   2 -10   2    0.29    0.16 
   2 -10   1    1.55    0.27 
   2 -10   1    1.80    0.30 
   2 -10   0    0.25    0.13 
   2 -10   0    0.27    0.15 
   2 -10  -1    2.53    0.39 
   2 -10  -1    2.16    0.29 
   2 -10  -2    0.91    0.27 
   2 -10  -3    0.16    0.19 
   2 -10  -4    0.74    0.26 
   2 -10  -5    0.06    0.16 
   2 -10  -6    0.23    0.20 
   2 -11   7    0.51    0.26 
   2 -11   6   -0.06    0.17 
   2 -11   5   -0.13    0.18 
   2 -11   4    0.37    0.22 
   2 -11   3   -0.07    0.19 
   2 -11   3    0.10    0.14 
   2 -11   2    0.22    0.15 
   2 -11   2    0.19    0.14 
   2 -11   1    0.69    0.22 
   2 -11   1    0.59    0.20 
   2 -11   0    1.15    0.29 
   2 -11   0    1.29    0.26 
   2 -11  -1    0.61    0.24 
   2 -11  -2   -0.09    0.15 
   2 -11  -3    0.34    0.26 
   2 -11  -4    0.20    0.19 
   2 -11  -5    0.98    0.34 
   2 -12   6    0.17    0.17 
   2 -12   5    0.43    0.23 
   2 -12   4    0.54    0.24 
   2 -12   3    0.45    0.23 
   2 -12   2    1.27    0.30 
   2 -12   2    1.84    0.33 
   2 -12   1    0.84    0.24 
   2 -12   1    0.40    0.17 
   2 -12   0   -0.03    0.14 
   2 -12  -1    1.30    0.31 
   2 -12  -2   -0.17    0.21 
   2 -12  -3    0.67    0.25 
   2 -13   4   -0.03    0.15 
   2 -13   3    1.45    0.34 
   2 -13   2   -0.12    0.14 
   2 -13   1    1.01    0.26 
   2 -13   0    0.14    0.17 
   2 -13  -1    0.00    0.15 
  -3 -13  -4    1.64    0.37 
  -3 -13  -3    0.37    0.22 
  -3 -13  -2    0.21    0.15 
  -3 -13   1   -0.01    0.15 
  -3 -12  -6    2.19    0.46 
  -3 -12  -5    0.82    0.31 
  -3 -12  -4    0.84    0.28 
  -3 -12  -3   -0.10    0.18 
  -3 -12  -2    0.38    0.23 
  -3 -12  -1    0.32    0.15 
  -3 -12   0    0.10    0.14 
  -3 -12   1    0.33    0.18 
  -3 -12   2    0.49    0.23 
  -3 -12   3   -0.03    0.24 
  -3 -11  -7    0.76    0.30 
  -3 -11  -6    0.94    0.32 
  -3 -11  -5    0.02    0.15 
  -3 -11  -4    0.32    0.22 
  -3 -11  -3    1.90    0.35 
  -3 -11  -2    0.46    0.15 
  -3 -11  -2    0.27    0.13 
  -3 -11  -2    0.47    0.21 
  -3 -11  -1    0.60    0.21 
  -3 -11  -1    0.27    0.16 
  -3 -11   0    1.55    0.28 
  -3 -11   0    1.43    0.26 
  -3 -11   1    0.01    0.11 
  -3 -11   2    0.05    0.14 
  -3 -11   3   -0.23    0.18 
  -3 -11   4    0.84    0.29 
  -3 -11   5    0.02    0.17 
  -3 -10  -8    0.96    0.32 
  -3 -10  -7    0.15    0.15 
  -3 -10  -6    0.01    0.12 
  -3 -10  -5    0.05    0.13 
  -3 -10  -4    0.35    0.20 
  -3 -10  -3    0.98    0.19 
  -3 -10  -3    0.88    0.24 
  -3 -10  -2    0.06    0.12 
  -3 -10  -2   -0.01    0.12 
  -3 -10  -2    0.22    0.14 
  -3 -10  -1    2.30    0.32 
  -3 -10  -1    2.10    0.26 
  -3 -10  -1    1.71    0.30 
  -3 -10   0    0.08    0.13 
  -3 -10   0   -0.11    0.13 
  -3 -10   1    1.81    0.30 
  -3 -10   1    1.73    0.26 
  -3 -10   2    0.02    0.11 
  -3 -10   3    0.41    0.18 
  -3 -10   3   -0.02    0.15 
  -3 -10   4    0.92    0.28 
  -3 -10   5    0.92    0.27 
  -3 -10   6    0.45    0.27 
  -3  -9  -9    0.87    0.31 
  -3  -9  -8    0.52    0.25 
  -3  -9  -7    0.23    0.15 
  -3  -9  -6    0.23    0.18 
  -3  -9  -5    0.04    0.14 
  -3  -9  -4    0.13    0.09 
  -3  -9  -3    0.72    0.16 
  -3  -9  -2    1.50    0.24 
  -3  -9  -2    1.72    0.25 
  -3  -9  -1   -0.10    0.10 
  -3  -9  -1   -0.06    0.09 
  -3  -9   0    2.95    0.35 
  -3  -9   0    2.17    0.22 
  -3  -9   0    2.30    0.29 
  -3  -9   1    0.29    0.15 
  -3  -9   1    0.36    0.13 
  -3  -9   2   -0.11    0.13 
  -3  -9   2    0.07    0.09 
  -3  -9   3    0.11    0.13 
  -3  -9   4    0.49    0.24 
  -3  -9   4    0.50    0.22 
  -3  -9   5    0.21    0.15 
  -3  -9   6    1.07    0.29 
  -3  -9   7    0.40    0.24 
  -3  -9   8   -0.13    0.23 
  -3  -8 -10    0.16    0.18 
  -3  -8  -9    0.27    0.23 
  -3  -8  -8    0.66    0.26 
  -3  -8  -7    0.10    0.11 
  -3  -8  -6    0.42    0.14 
  -3  -8  -5    0.19    0.13 
  -3  -8  -4    2.10    0.30 
  -3  -8  -3    0.61    0.18 
   3   8   2    2.75    0.20 
  -3  -8  -2    2.68    0.28 
  -3  -8  -2    2.74    0.31 
   3   8   1    1.40    0.14 
  -3  -8  -1    1.65    0.21 
  -3  -8  -1    1.54    0.24 
  -3  -8   0    0.84    0.19 
  -3  -8   0    0.94    0.14 
  -3  -8   1   -0.02    0.12 
  -3  -8   2    0.94    0.22 
  -3  -8   2    0.64    0.13 
  -3  -8   3    0.06    0.14 
  -3  -8   3    0.24    0.07 
  -3  -8   4    1.98    0.35 
  -3  -8   4    1.60    0.30 
  -3  -8   5    0.32    0.17 
  -3  -8   5    0.09    0.15 
  -3  -8   6   -0.01    0.16 
  -3  -8   7    0.16    0.18 
  -3  -8   8   -0.20    0.19 
  -3  -8   9   -0.11    0.18 
  -3  -7 -12    0.00    0.13 
  -3  -7 -11   -0.01    0.12 
  -3  -7 -11    0.03    0.16 
  -3  -7 -10    1.89    0.32 
  -3  -7 -10    1.60    0.37 
  -3  -7  -9   -0.08    0.09 
  -3  -7  -9   -0.25    0.22 
  -3  -7  -8    1.82    0.27 
  -3  -7  -8    1.90    0.25 
  -3  -7  -7    3.58    0.34 
  -3  -7  -6    6.38    0.45 
  -3  -7  -5    0.03    0.10 
  -3  -7  -4    4.46    0.39 
  -3  -7  -3    3.77    0.37 
  -3  -7  -2    5.51    0.45 
   3   7   2    5.64    0.25 
  -3  -7  -2    5.24    0.38 
   3   7   1    4.90    0.23 
  -3  -7  -1    5.19    0.44 
  -3  -7  -1    5.18    0.34 
  -3  -7  -1    5.04    0.39 
  -3  -7   0    0.02    0.08 
  -3  -7   0    0.08    0.13 
  -3  -7   1    4.47    0.41 
  -3  -7   2    4.04    0.42 
  -3  -7   3   -0.18    0.17 
  -3  -7   3    0.07    0.05 
  -3  -7   4    0.06    0.17 
  -3  -7   4    0.31    0.20 
  -3  -7   5    0.62    0.23 
  -3  -7   5    0.74    0.25 
  -3  -7   6    0.79    0.23 
  -3  -7   7   -0.01    0.15 
  -3  -7   8    0.30    0.17 
  -3  -7   9    0.25    0.20 
  -3  -7  10    0.26    0.21 
  -3  -6 -13    0.39    0.23 
  -3  -6 -12    0.50    0.22 
  -3  -6 -12    1.06    0.31 
  -3  -6 -12    0.76    0.25 
  -3  -6 -11    0.02    0.12 
  -3  -6 -11    0.34    0.17 
  -3  -6 -10    1.34    0.28 
  -3  -6 -10    0.80    0.26 
  -3  -6  -9    1.08    0.24 
  -3  -6  -8   14.54    0.63 
  -3  -6  -8   14.63    0.74 
  -3  -6  -7    1.02    0.18 
  -3  -6  -7    1.18    0.21 
  -3  -6  -6   12.73    0.58 
  -3  -6  -6   12.37    0.59 
  -3  -6  -5    0.04    0.10 
  -3  -6  -4    0.00    0.11 
  -3  -6  -3    3.40    0.32 
  -3  -6  -2   18.16    0.65 
  -3  -6  -2   18.44    0.74 
   3   6   2   17.59    0.39 
  -3  -6  -1    2.45    0.30 
   3   6   1    2.07    0.13 
  -3  -6  -1    2.17    0.21 
  -3  -6   0   45.81    1.17 
  -3  -6   0   46.44    1.24 
  -3  -6   0   48.13    0.83 
  -3  -6   1    0.50    0.17 
  -3  -6   2    3.32    0.36 
  -3  -6   3    0.43    0.09 
  -3  -6   3    0.40    0.15 
  -3  -6   4    4.25    0.16 
  -3  -6   4    4.74    0.16 
  -3  -6   4    5.22    0.49 
  -3  -6   4    5.49    0.49 
  -3  -6   5   -0.32    0.22 
  -3  -6   5    0.13    0.17 
  -3  -6   6    0.44    0.19 
  -3  -6   7    0.08    0.14 
  -3  -6   8   -0.32    0.18 
  -3  -6   9   -0.03    0.15 
  -3  -6  10    0.02    0.16 
  -3  -6  11    0.49    0.21 
  -3  -5 -13    0.07    0.13 
  -3  -5 -13    0.38    0.21 
  -3  -5 -12    0.73    0.25 
  -3  -5 -12    0.50    0.19 
  -3  -5 -12    0.52    0.24 
  -3  -5 -11    1.12    0.27 
  -3  -5 -11    1.11    0.29 
  -3  -5 -11    1.03    0.27 
  -3  -5 -10    4.83    0.49 
  -3  -5  -9    1.28    0.27 
  -3  -5  -9    1.39    0.20 
  -3  -5  -8    6.20    0.41 
  -3  -5  -8    6.04    0.47 
  -3  -5  -7    0.13    0.10 
  -3  -5  -7    0.19    0.11 
  -3  -5  -6   16.39    0.65 
  -3  -5  -6   16.05    0.64 
  -3  -5  -5   10.46    0.52 
  -3  -5  -5   10.57    0.46 
  -3  -5  -4   34.95    0.71 
  -3  -5  -4   36.10    0.94 
  -3  -5  -3   20.73    0.74 
  -3  -5  -3   21.99    0.75 
  -3  -5  -2   20.52    0.73 
  -3  -5  -2   20.05    0.65 
  -3  -5  -1    2.32    0.27 
  -3  -5  -1    2.10    0.20 
   3   5   1    1.92    0.09 
  -3  -5   0    1.26    0.21 
  -3  -5   1   22.20    0.80 
  -3  -5   1   22.18    0.81 
  -3  -5   2   17.56    0.75 
  -3  -5   3    4.78    0.43 
  -3  -5   3    4.57    0.24 
  -3  -5   4    1.31    0.26 
  -3  -5   4    1.22    0.09 
  -3  -5   4    1.08    0.24 
  -3  -5   5    0.12    0.13 
  -3  -5   5    0.16    0.12 
  -3  -5   6    0.10    0.13 
  -3  -5   6    0.14    0.16 
  -3  -5   7    0.35    0.18 
  -3  -5   8    0.10    0.14 
  -3  -5   9    1.04    0.29 
  -3  -5  10    0.11    0.14 
   3   5 -11    0.26    0.20 
  -3  -5  11   -0.08    0.14 
  -3  -4 -13    0.19    0.16 
  -3  -4 -13    0.19    0.14 
  -3  -4 -12   -0.21    0.17 
  -3  -4 -12    0.26    0.16 
  -3  -4 -12   -0.06    0.16 
  -3  -4 -11    1.59    0.32 
  -3  -4 -11    0.89    0.26 
  -3  -4 -11    1.43    0.31 
  -3  -4 -10    0.06    0.09 
  -3  -4 -10    0.27    0.14 
  -3  -4 -10    0.18    0.15 
  -3  -4  -9    1.80    0.22 
  -3  -4  -9    2.05    0.32 
  -3  -4  -8   26.82    0.84 
  -3  -4  -8   26.46    0.99 
  -3  -4  -7    3.29    0.29 
  -3  -4  -7    3.03    0.32 
  -3  -4  -6   23.52    0.75 
  -3  -4  -6   24.09    0.77 
   3   4   5    2.07    0.22 
  -3  -4  -5    2.05    0.20 
  -3  -4  -5    1.82    0.21 
  -3  -4  -4    7.82    0.42 
   3   4   4    7.98    0.42 
  -3  -4  -4    7.76    0.46 
  -3  -4  -4    8.17    0.33 
  -3  -4  -3    2.96    0.16 
   3   4   3    2.99    0.26 
  -3  -4  -3    2.89    0.26 
  -3  -4  -3    2.49    0.24 
   3   4   2    7.16    0.40 
  -3  -4  -2    7.23    0.41 
  -3  -4  -2    7.74    0.38 
  -3  -4  -1   45.51    1.02 
  -3  -4  -1   45.53    0.83 
  -3  -4   0   11.22    0.53 
  -3  -4   1    6.80    0.43 
   3   4  -1    7.42    0.26 
  -3  -4   1    7.18    0.45 
  -3  -4   2   -0.01    0.11 
   3   4  -2    0.03    0.03 
  -3  -4   2    0.03    0.07 
  -3  -4   3    0.10    0.09 
  -3  -4   3    0.27    0.07 
  -3  -4   4    1.06    0.10 
  -3  -4   4    0.83    0.19 
  -3  -4   4    1.37    0.23 
  -3  -4   5    1.77    0.26 
  -3  -4   5    1.80    0.11 
  -3  -4   5    2.11    0.32 
  -3  -4   6    6.95    0.54 
  -3  -4   6    7.49    0.59 
  -3  -4   7    0.06    0.14 
  -3  -4   8    0.11    0.12 
  -3  -4   9    0.12    0.12 
  -3  -4  10    0.00    0.12 
   3   4 -10    0.17    0.19 
   3   4 -11    0.36    0.19 
  -3  -4  11   -0.07    0.12 
  -3  -3 -13    0.56    0.21 
  -3  -3 -13    0.38    0.22 
  -3  -3 -13    0.85    0.28 
  -3  -3 -12    0.13    0.13 
  -3  -3 -12    0.33    0.15 
  -3  -3 -12    0.46    0.22 
  -3  -3 -11    1.38    0.31 
  -3  -3 -10    4.83    0.38 
  -3  -3 -10    4.20    0.48 
  -3  -3  -9    0.46    0.13 
  -3  -3  -9    0.21    0.14 
  -3  -3  -8    5.67    0.39 
  -3  -3  -8    6.27    0.52 
  -3  -3  -7    8.95    0.46 
  -3  -3  -7    8.84    0.58 
  -3  -3  -6    0.00    0.08 
   3   3   5    1.23    0.17 
  -3  -3  -5    1.01    0.16 
  -3  -3  -4   44.79    0.95 
   3   3   4   44.79    0.95 
   3   3   3   25.74    0.71 
  -3  -3  -3   24.50    0.70 
  -3  -3  -3   23.72    0.70 
  -3  -3  -2    1.34    0.17 
  -3  -3  -2    1.26    0.18 
  -3  -3  -1    3.21    0.26 
   3   3   1    3.62    0.23 
   3   3   0    0.14    0.07 
  -3  -3   0    0.19    0.13 
   3   3   0    0.11    0.03 
  -3  -3   1    4.73    0.32 
  -3  -3   1    4.71    0.27 
  -3  -3   2   45.06    1.02 
  -3  -3   2   44.36    1.07 
  -3  -3   2   45.72    0.79 
  -3  -3   3    5.64    0.26 
  -3  -3   3    5.16    0.40 
  -3  -3   4    3.45    0.35 
  -3  -3   4    3.62    0.20 
  -3  -3   4    3.41    0.32 
  -3  -3   5   -0.06    0.12 
  -3  -3   5   -0.14    0.13 
   3   3  -5   -0.03    0.05 
  -3  -3   5    0.08    0.04 
  -3  -3   6    4.57    0.41 
   3   3  -6    4.20    0.25 
  -3  -3   6    4.18    0.43 
  -3  -3   7    0.62    0.19 
  -3  -3   8    0.07    0.11 
  -3  -3   9    0.73    0.23 
   3   3  -9    0.70    0.23 
   3   3 -10    0.55    0.22 
  -3  -3  10    0.78    0.23 
   3   3 -11    0.51    0.23 
  -3  -2 -14    0.14    0.18 
  -3  -2 -13    0.11    0.15 
  -3  -2 -12    1.25    0.29 
  -3  -2 -12    0.67    0.22 
  -3  -2 -11    0.09    0.14 
  -3  -2 -11    0.31    0.13 
  -3  -2 -10    7.08    0.59 
  -3  -2 -10    7.47    0.49 
  -3  -2  -9    4.13    0.35 
  -3  -2  -9    4.01    0.42 
  -3  -2  -8    0.08    0.09 
  -3  -2  -8    0.00    0.14 
  -3  -2  -7    0.26    0.11 
  -3  -2  -7    0.35    0.14 
  -3  -2  -6    4.11    0.31 
  -3  -2  -5   48.96    1.00 
  -3  -2  -4    3.64    0.27 
   3   2   4    3.66    0.27 
  -3  -2  -3   69.30    1.11 
   3   2   3   69.48    1.12 
   3   2   2  175.93    1.63 
  -3  -2  -2  172.06    1.71 
   3   2   1    0.20    0.07 
  -3  -2  -1    0.31    0.04 
  -3  -2  -1    0.47    0.12 
  -3  -2   0    5.61    0.30 
   3   2   0    5.42    0.19 
  -3  -2   0    5.71    0.31 
  -3  -2   1    0.38    0.09 
   3   2  -1    0.43    0.08 
  -3  -2   1    0.50    0.12 
   3   2  -1    0.37    0.10 
  -3  -2   2   -0.07    0.11 
   3   2  -2   -0.10    0.07 
   3   2  -2    0.01    0.06 
  -3  -2   2    0.13    0.10 
  -3  -2   2    0.08    0.07 
   3   2  -2    0.01    0.06 
  -3  -2   3   44.67    1.07 
   3   2  -3   45.42    0.99 
   3   2  -3   46.18    0.96 
  -3  -2   3   45.00    0.78 
   3   2  -3   45.38    0.85 
  -3  -2   4    4.30    0.36 
   3   2  -4    4.45    0.27 
  -3  -2   4    4.22    0.32 
   3   2  -4    4.42    0.32 
  -3  -2   4    4.11    0.25 
   3   2  -5    2.33    0.22 
  -3  -2   5    2.16    0.28 
  -3  -2   5    2.20    0.25 
  -3  -2   5    2.14    0.19 
   3   2  -6    1.66    0.20 
  -3  -2   6    1.71    0.23 
   3   2  -6    2.32    0.32 
   3   2  -7    6.14    0.37 
  -3  -2   7    6.13    0.47 
   3   2  -7    5.58    0.52 
   3   2  -8    0.39    0.19 
  -3  -2   8    0.33    0.16 
   3   2  -9    0.21    0.20 
  -3  -2   9    0.27    0.17 
  -3  -2  10    0.24    0.15 
   3   2 -10    0.25    0.19 
   3   2 -11    1.12    0.33 
  -3  -1 -14    0.21    0.18 
  -3  -1 -13    0.35    0.18 
  -3  -1 -12    3.12    0.39 
  -3  -1 -12    3.46    0.46 
  -3  -1 -11    0.26    0.11 
  -3  -1 -11    0.30    0.14 
  -3  -1 -10    3.05    0.33 
  -3  -1 -10    2.24    0.33 
  -3  -1  -9    0.89    0.19 
  -3  -1  -9    1.02    0.23 
  -3  -1  -8    1.42    0.21 
  -3  -1  -8    1.27    0.24 
  -3  -1  -7    0.47    0.15 
  -3  -1  -7    0.55    0.15 
  -3  -1  -6    6.63    0.40 
  -3  -1  -6    6.11    0.41 
  -3  -1  -5    2.65    0.25 
  -3  -1  -4   56.76    1.02 
  -3  -1  -3  152.06    1.60 
   3   1   3  155.85    1.61 
  -3  -1  -2   26.50    0.65 
   3   1   2   27.86    0.64 
  -3  -1  -1   54.25    0.88 
  -3  -1   0    0.50    0.08 
   3   1   0    0.47    0.12 
  -3  -1   0    0.58    0.11 
   3   1   0    0.33    0.08 
  -3  -1   0    0.58    0.11 
  -3  -1   1   90.13    1.15 
   3   1  -1   84.17    1.17 
  -3  -1   1   88.13    1.11 
   3   1  -1   89.92    1.12 
   3   1  -1   88.48    1.08 
  -3  -1   2   -0.04    0.10 
   3   1  -2    0.06    0.06 
  -3  -1   2    0.12    0.08 
  -3  -1   2    0.14    0.06 
   3   1  -2    0.17    0.09 
  -3  -1   3    2.46    0.25 
   3   1  -3    2.44    0.20 
   3   1  -3    2.60    0.23 
  -3  -1   3    2.93    0.22 
   3   1  -3    2.54    0.24 
  -3  -1   4    6.12    0.41 
  -3  -1   4    6.00    0.34 
   3   1  -4    6.43    0.34 
  -3  -1   4    6.36    0.34 
   3   1  -4    6.07    0.42 
   3   1  -4    6.03    0.34 
  -3  -1   5    0.60    0.16 
  -3  -1   5    0.67    0.15 
   3   1  -5    0.43    0.13 
   3   1  -5    0.63    0.12 
   3   1  -5    0.85    0.13 
  -3  -1   5    0.54    0.11 
  -3  -1   6    0.35    0.11 
   3   1  -6    0.34    0.16 
   3   1  -6    0.10    0.08 
   3   1  -6    0.38    0.09 
  -3  -1   7    4.74    0.38 
   3   1  -7    4.05    0.33 
   3   1  -7    4.06    0.45 
  -3  -1   8    1.69    0.23 
   3   1  -8    1.32    0.20 
   3   1  -8    1.45    0.30 
  -3  -1   9    1.22    0.22 
   3   1  -9    1.43    0.30 
   3   1 -10    0.24    0.20 
   3   1 -11    0.06    0.14 
  -3   0 -14   -0.22    0.18 
  -3   0 -13    0.47    0.21 
   3   0  12    0.57    0.20 
  -3   0 -12    0.70    0.24 
  -3   0 -12    0.57    0.18 
   3   0  11    0.10    0.12 
  -3   0 -11   -0.07    0.11 
  -3   0 -11    0.11    0.15 
  -3   0 -10    0.33    0.15 
   3   0  10    0.13    0.13 
  -3   0 -10    0.40    0.16 
   3   0   9    1.60    0.28 
  -3   0  -9    1.44    0.25 
   3   0   8    0.61    0.18 
  -3   0  -8    0.61    0.18 
  -3   0  -7    0.60    0.15 
   3   0   7    0.78    0.18 
   3   0   6   13.29    0.61 
  -3   0  -6   12.59    0.57 
   3   0   5    3.80    0.31 
  -3   0  -5    3.66    0.29 
   3   0   4    0.07    0.09 
   3   0   4   -0.06    0.11 
  -3   0  -4    0.01    0.10 
   3   0   3    0.22    0.08 
  -3   0  -3    0.35    0.11 
  -3   0  -2   12.61    0.44 
  -3   0  -1   -0.07    0.09 
   3   0   1    0.17    0.10 
  -3   0   0   11.76    0.39 
   3   0   0   11.95    0.46 
   3   0   0   12.25    0.39 
  -3   0   0   12.03    0.39 
   3   0  -1    3.44    0.26 
  -3   0   1    3.70    0.25 
  -3   0   1    3.18    0.20 
   3   0  -1    3.30    0.20 
  -3   0   1    3.23    0.23 
  -3   0   2    7.32    0.35 
  -3   0   2    7.04    0.29 
   3   0  -2    7.20    0.37 
  -3   0   2    7.29    0.39 
   3   0  -2    7.61    0.30 
  -3   0   2    7.57    0.37 
   3   0  -2    7.48    0.39 
  -3   0   3   45.75    0.74 
   3   0  -3   47.57    0.75 
  -3   0   3   46.87    0.76 
  -3   0   3   47.44    0.95 
   3   0  -3   47.21    0.97 
  -3   0   3   48.63    0.97 
   3   0  -3   46.13    1.07 
  -3   0   4    6.70    0.32 
   3   0  -4    6.79    0.29 
  -3   0   4    6.57    0.38 
   3   0  -4    6.64    0.39 
   3   0  -4    6.53    0.45 
  -3   0   4    6.44    0.39 
  -3   0   5    0.22    0.12 
  -3   0   5    0.16    0.10 
   3   0  -5    0.03    0.10 
   3   0  -5    0.10    0.08 
   3   0  -5    0.11    0.05 
   3   0  -6    1.00    0.18 
  -3   0   6    0.85    0.15 
   3   0  -6    0.74    0.21 
   3   0  -6    0.90    0.13 
  -3   0   7    3.96    0.32 
   3   0  -7    3.79    0.34 
   3   0  -7    4.19    0.45 
   3   0  -8    0.08    0.11 
   3   0  -8   -0.15    0.10 
  -3   0   8    0.07    0.08 
   3   0  -9    0.60    0.15 
   3   0  -9    0.50    0.21 
   3   0 -10    0.13    0.17 
   3   0 -11    0.06    0.16 
   3  -1  14   -0.14    0.19 
  -3   1 -13    0.26    0.15 
   3  -1  13   -0.02    0.11 
  -3   1 -12    0.64    0.21 
   3  -1  12    0.36    0.19 
   3  -1  11    1.31    0.28 
  -3   1 -11    1.58    0.28 
  -3   1 -10    1.40    0.25 
   3  -1  10    1.43    0.29 
  -3   1  -9   -0.01    0.12 
   3  -1   9    0.07    0.12 
  -3   1  -8    1.96    0.27 
   3  -1   8    1.94    0.29 
   3  -1   7    3.02    0.33 
  -3   1  -7    3.26    0.31 
  -3   1  -6    0.41    0.11 
   3  -1   6    0.78    0.17 
   3  -1   5    5.34    0.37 
   3  -1   5    5.23    0.33 
   3  -1   4    9.85    0.46 
  -3   1  -4   10.97    0.45 
   3  -1   4   10.39    0.44 
   3  -1   3   27.34    0.68 
  -3   1  -3   26.79    0.71 
   3  -1   2   30.66    0.65 
   3  -1   2   31.23    0.75 
  -3   1  -2   32.00    0.65 
  -3   1  -1   24.96    0.51 
   3  -1   1   23.53    0.66 
  -3   1  -1   23.99    0.58 
   3  -1   0    2.21    0.22 
  -3   1   0    1.93    0.16 
  -3   1   0    2.33    0.14 
   3  -1  -1    7.28    0.28 
   3  -1  -1    8.14    0.40 
  -3   1   1    7.54    0.27 
  -3   1   1    7.34    0.37 
  -3   1   2   35.35    0.54 
   3  -1  -2   35.29    0.85 
  -3   1   2   35.47    0.85 
   3  -1  -2   34.58    0.55 
  -3   1   2   35.50    0.88 
  -3   1   3    1.77    0.12 
   3  -1  -3    1.62    0.22 
  -3   1   3    1.75    0.21 
   3  -1  -3    1.85    0.12 
  -3   1   3    1.70    0.17 
  -3   1   3    1.74    0.12 
   3  -1  -4    1.59    0.21 
   3  -1  -4    1.36    0.11 
   3  -1  -4    1.33    0.23 
  -3   1   4    1.34    0.12 
  -3   1   4    1.55    0.18 
  -3   1   5    5.28    0.27 
   3  -1  -5    5.98    0.41 
   3  -1  -5    5.50    0.21 
   3  -1  -5    5.82    0.47 
   3  -1  -6    1.51    0.28 
  -3   1   6    1.67    0.17 
   3  -1  -6    1.70    0.12 
   3  -1  -6    1.80    0.25 
   3  -1  -7    1.08    0.25 
  -3   1   7    1.40    0.17 
   3  -1  -7    1.43    0.24 
   3  -1  -8    0.14    0.14 
   3  -1  -8    0.21    0.13 
   3  -1  -9    0.23    0.21 
   3  -1  -9    0.15    0.12 
   3  -1 -10    0.03    0.16 
   3  -1 -11    0.29    0.20 
   3  -2  14    0.09    0.16 
   3  -2  13    0.33    0.23 
   3  -2  12    0.37    0.23 
  -3   2 -12    0.32    0.13 
  -3   2 -11    0.06    0.10 
   3  -2  11   -0.15    0.15 
   3  -2  10    0.20    0.18 
  -3   2 -10    0.07    0.12 
   3  -2   9    5.82    0.53 
  -3   2  -9    5.35    0.43 
   3  -2   8    0.47    0.17 
  -3   2  -7    9.43    0.45 
   3  -2   7    8.84    0.55 
   3  -2   6    0.10    0.12 
  -3   2  -6   -0.01    0.06 
   3  -2   6    0.02    0.07 
  -3   2  -5   55.42    1.06 
   3  -2   5   55.42    1.19 
   3  -2   5   58.50    1.08 
   3  -2   4    4.63    0.33 
  -3   2  -4    4.59    0.30 
   3  -2   4    4.95    0.30 
   3  -2   3   25.61    0.69 
   3  -2   3   26.75    0.71 
  -3   2  -3   27.44    0.70 
  -3   2  -3   28.79    0.73 
  -3   2  -2   30.67    0.67 
   3  -2   2   31.66    0.78 
  -3   2  -2   31.59    0.74 
   3  -2   2   30.36    0.67 
  -3   2  -1    0.21    0.06 
   3  -2   1    0.11    0.10 
   3  -2   1   -0.03    0.07 
   3  -2   0    5.48    0.35 
  -3   2   0    5.16    0.20 
  -3   2   1   34.62    0.36 
  -3   2   1   36.28    0.59 
   3  -2  -1   36.75    0.89 
  -3   2   1   37.21    0.89 
   3  -2  -2    1.88    0.23 
  -3   2   2    2.20    0.13 
  -3   2   3    4.19    0.24 
   3  -2  -3    4.13    0.35 
  -3   2   3    3.48    0.12 
   3  -2  -4    4.25    0.37 
  -3   2   4    4.09    0.26 
   3  -2  -5    4.46    0.38 
  -3   2   5    4.23    0.18 
   3  -2  -5    4.58    0.43 
  -3   2   6    0.00    0.04 
   3  -2  -6    0.07    0.16 
   3  -2  -6    0.08    0.10 
   3  -2  -7    0.35    0.18 
   3  -2  -7    0.18    0.09 
   3  -2  -8    1.11    0.27 
   3  -2  -8    1.28    0.26 
   3  -2  -9    0.46    0.18 
   3  -2  -9    0.55    0.23 
   3  -2 -10    0.16    0.16 
   3  -2 -10    0.27    0.13 
   3  -3  13    0.08    0.16 
   3  -3  12   -0.34    0.20 
   3  -3  11    1.19    0.28 
   3  -3  10    0.21    0.18 
   3  -3   9    2.88    0.39 
   3  -3   8    0.14    0.18 
  -3   3  -8    0.32    0.11 
   3  -3   7    3.59    0.38 
  -3   3  -7    2.77    0.25 
  -3   3  -6    0.67    0.12 
   3  -3   6    0.77    0.14 
   3  -3   6    0.75    0.19 
   3  -3   5   15.49    0.67 
  -3   3  -5   16.45    0.56 
   3  -3   5   16.08    0.56 
   3  -3   4   21.87    0.74 
  -3   3  -4   22.51    0.64 
   3  -3   4   22.39    0.67 
  -3   3  -3    4.03    0.29 
   3  -3   3    3.32    0.28 
  -3   3  -3    3.53    0.26 
   3  -3   3    3.66    0.28 
   3  -3   2   35.39    0.76 
   3  -3   2   36.85    0.88 
  -3   3  -2   36.56    0.84 
  -3   3  -2   37.51    0.78 
  -3   3  -1    3.62    0.22 
   3  -3   1    3.76    0.23 
   3  -3   1    3.28    0.27 
  -3   3  -1    3.63    0.28 
   3  -3   0  105.42    1.55 
  -3   3   0  107.96    0.97 
   3  -3   0  104.54    0.97 
   3  -3  -1    5.19    0.37 
  -3   3   2    5.67    0.21 
   3  -3  -2    6.00    0.42 
  -3   3   2    5.61    0.21 
   3  -3  -3    0.84    0.17 
  -3   3   3    0.75    0.09 
   3  -3  -4    1.74    0.25 
   3  -3  -5    0.53    0.18 
   3  -3  -5    0.87    0.22 
   3  -3  -6    0.28    0.16 
   3  -3  -6    0.29    0.19 
   3  -3  -7    1.36    0.29 
   3  -3  -7    1.07    0.23 
   3  -3  -8    0.74    0.23 
   3  -3  -8    0.59    0.19 
   3  -3  -9    0.21    0.15 
   3  -3  -9   -0.01    0.11 
   3  -3 -10    0.14    0.22 
   3  -3 -10   -0.20    0.17 
   3  -4  13    0.12    0.20 
   3  -4  12    0.42    0.23 
   3  -4  11    0.64    0.25 
   3  -4  10    0.37    0.22 
   3  -4   9    0.52    0.22 
  -3   4  -8    0.90    0.14 
   3  -4   8    0.49    0.19 
   3  -4   7    9.32    0.61 
  -3   4  -7    8.24    0.39 
  -3   4  -6    3.86    0.26 
   3  -4   6    4.05    0.39 
   3  -4   6    3.45    0.28 
  -3   4  -5    8.57    0.40 
   3  -4   5    8.31    0.52 
   3  -4   5    8.91    0.43 
   3  -4   4    1.67    0.23 
  -3   4  -4    1.37    0.17 
   3  -4   4    1.29    0.19 
   3  -4   3    4.24    0.32 
   3  -4   3    4.45    0.34 
  -3   4  -3    4.26    0.30 
  -3   4  -2   26.72    0.76 
   3  -4   2   25.27    0.70 
  -3   4  -2   26.11    0.71 
   3  -4   2   25.32    0.76 
  -3   4  -1    1.68    0.17 
   3  -4   1    1.50    0.17 
   3  -4   0    0.83    0.11 
   3  -4   0    0.85    0.17 
   3  -4  -1    8.24    0.24 
   3  -4  -1    8.31    0.49 
   3  -4  -2    9.60    0.56 
  -3   4   3    0.46    0.05 
  -3   4   3    0.57    0.05 
   3  -4  -3    0.77    0.19 
   3  -4  -4    6.55    0.51 
   3  -4  -5    4.77    0.45 
   3  -4  -6    0.10    0.12 
   3  -4  -7   -0.04    0.13 
   3  -4  -7    0.00    0.13 
   3  -4  -8    0.65    0.20 
   3  -4  -8    0.73    0.25 
   3  -4  -9    1.28    0.32 
   3  -4  -9    1.32    0.27 
   3  -4 -10    0.32    0.16 
   3  -4 -10    0.18    0.20 
   3  -4 -11    0.32    0.19 
   3  -5  12   -0.15    0.21 
   3  -5  11    0.06    0.14 
   3  -5  10    1.94    0.36 
   3  -5   9    0.99    0.25 
   3  -5   8    2.45    0.37 
   3  -5   7    3.52    0.42 
  -3   5  -7    3.73    0.25 
   3  -5   7    3.45    0.28 
   3  -5   6    1.08    0.23 
   3  -5   6    1.24    0.18 
  -3   5  -6    1.27    0.15 
   3  -5   5   26.13    0.96 
   3  -5   5   27.40    0.77 
  -3   5  -5   26.56    0.72 
   3  -5   4    2.38    0.27 
   3  -5   4    2.49    0.25 
  -3   5  -4    2.61    0.24 
   3  -5   3    0.30    0.14 
   3  -5   3    0.30    0.13 
   3  -5   2    0.01    0.08 
   3  -5   2    0.00    0.11 
   3  -5   1    5.68    0.40 
   3  -5   1    5.51    0.32 
   3  -5   0    0.67    0.12 
   3  -5   0    0.58    0.16 
  -3   5   1    0.00    0.02 
   3  -5  -1    0.04    0.10 
   3  -5  -1   -0.05    0.05 
   3  -5  -2    3.90    0.15 
   3  -5  -2    4.58    0.41 
  -3   5   3   10.72    0.29 
   3  -5  -3   10.66    0.66 
   3  -5  -4    0.70    0.20 
   3  -5  -5    2.97    0.39 
   3  -5  -6    0.09    0.17 
   3  -5  -7    3.42    0.45 
   3  -5  -8    0.03    0.16 
   3  -5  -9    0.17    0.19 
   3  -5 -10    0.97    0.28 
   3  -5 -11    0.07    0.16 
   3  -6  12    0.01    0.17 
   3  -6  11    0.26    0.19 
   3  -6  10    0.60    0.25 
   3  -6   9    0.88    0.27 
   3  -6   8    0.08    0.17 
   3  -6   7   18.35    0.94 
   3  -6   6   11.08    0.70 
  -3   6  -6   10.00    0.44 
   3  -6   6    9.31    0.45 
   3  -6   5    2.87    0.36 
   3  -6   5    3.19    0.29 
  -3   6  -5    2.81    0.25 
   3  -6   4    8.74    0.56 
   3  -6   4    9.19    0.50 
   3  -6   3    1.95    0.26 
   3  -6   3    2.13    0.25 
   3  -6   2    3.47    0.32 
   3  -6   2    3.96    0.33 
  -3   6  -2    3.67    0.29 
   3  -6   1    2.41    0.29 
   3  -6   1    2.01    0.22 
  -3   6  -1    2.25    0.20 
   3  -6   0   13.28    0.49 
   3  -6   0   13.58    0.69 
  -3   6   0   13.59    0.40 
  -3   6   1    0.13    0.03 
   3  -6  -1    0.19    0.06 
   3  -6  -1    0.05    0.12 
   3  -6  -2    0.45    0.08 
   3  -6  -2    0.32    0.16 
  -3   6   3    0.88    0.11 
   3  -6  -3    1.14    0.26 
   3  -6  -4    2.64    0.37 
   3  -6  -5   10.57    0.76 
   3  -6  -6   -0.17    0.15 
   3  -6  -7   -0.02    0.15 
   3  -6  -8    0.68    0.23 
   3  -6  -9    0.32    0.21 
   3  -6 -10   -0.02    0.13 
   3  -7  11   -0.07    0.16 
   3  -7  10    0.80    0.30 
   3  -7   9    1.72    0.34 
   3  -7   8    0.31    0.20 
   3  -7   7    0.18    0.15 
   3  -7   6    1.76    0.32 
   3  -7   6    2.02    0.23 
   3  -7   5    4.34    0.44 
   3  -7   5    4.25    0.36 
   3  -7   4    1.54    0.26 
   3  -7   4    1.87    0.27 
   3  -7   3    1.26    0.24 
   3  -7   3    1.01    0.18 
   3  -7   2    0.33    0.14 
   3  -7   2    0.17    0.10 
   3  -7   1    0.52    0.13 
  -3   7  -1    0.33    0.10 
   3  -7   1    0.54    0.16 
  -3   7   0    3.88    0.23 
   3  -7   0    3.60    0.29 
   3  -7   0    3.58    0.38 
   3  -7  -1    2.35    0.21 
   3  -7  -1    2.15    0.32 
   3  -7  -2   10.22    0.38 
  -3   7   2    9.88    0.46 
   3  -7  -2   10.51    0.71 
   3  -7  -3    2.87    0.38 
   3  -7  -4    0.51    0.22 
   3  -7  -5   -0.08    0.13 
   3  -7  -6    1.81    0.37 
   3  -7  -7    0.81    0.25 
   3  -7  -8   -0.04    0.17 
   3  -7  -9    0.75    0.33 
   3  -8  10    0.32    0.26 
   3  -8   9    0.12    0.20 
   3  -8   8    0.90    0.27 
   3  -8   7    0.19    0.17 
   3  -8   6    1.00    0.25 
   3  -8   6    1.14    0.21 
   3  -8   5    2.51    0.32 
   3  -8   5    1.39    0.29 
   3  -8   4    6.70    0.49 
   3  -8   4    5.89    0.50 
   3  -8   3    0.21    0.15 
   3  -8   3   -0.24    0.16 
   3  -8   2    9.23    0.57 
   3  -8   2    9.88    0.61 
   3  -8   1    3.27    0.33 
   3  -8   1    2.94    0.36 
   3  -8   0    8.26    0.47 
   3  -8   0    6.93    0.55 
   3  -8  -1    3.66    0.43 
   3  -8  -1    3.83    0.30 
   3  -8  -2    0.34    0.10 
   3  -8  -2    0.12    0.14 
   3  -8  -3   -0.14    0.17 
   3  -8  -4    2.23    0.39 
   3  -8  -5    0.90    0.28 
   3  -8  -6    0.11    0.17 
   3  -8  -7    0.66    0.30 
   3  -8  -8    0.14    0.19 
   3  -9   9   -0.04    0.14 
   3  -9   8   -0.06    0.17 
   3  -9   7    0.44    0.21 
   3  -9   6    2.55    0.40 
   3  -9   5    0.32    0.19 
   3  -9   5    0.31    0.17 
   3  -9   4    1.66    0.31 
   3  -9   4    1.31    0.25 
   3  -9   3    2.38    0.32 
   3  -9   3    2.12    0.30 
   3  -9   2    0.22    0.17 
   3  -9   2   -0.08    0.10 
   3  -9   1    0.38    0.15 
   3  -9   1    0.11    0.13 
   3  -9   0    1.62    0.23 
   3  -9   0    1.57    0.29 
   3  -9  -1    6.68    0.59 
   3  -9  -1    6.37    0.42 
   3  -9  -2    0.21    0.17 
   3  -9  -3    0.70    0.26 
   3  -9  -4   -0.03    0.16 
   3  -9  -5   -0.10    0.15 
   3  -9  -6    0.13    0.17 
   3  -9  -7    0.58    0.28 
   3 -10   8    0.94    0.30 
   3 -10   7    3.37    0.49 
   3 -10   6    0.40    0.20 
   3 -10   5    1.27    0.29 
   3 -10   4   -0.01    0.12 
   3 -10   4   -0.01    0.10 
   3 -10   3    0.67    0.21 
   3 -10   3   -0.10    0.19 
   3 -10   2    0.10    0.12 
   3 -10   2    0.03    0.17 
   3 -10   1    1.19    0.23 
   3 -10   1    1.09    0.27 
   3 -10   0    0.01    0.10 
   3 -10   0    0.11    0.15 
   3 -10  -1    0.16    0.16 
   3 -10  -2   -0.09    0.15 
   3 -10  -3    0.60    0.26 
   3 -10  -4    0.41    0.21 
   3 -10  -5   -0.34    0.21 
   3 -11   7   -0.11    0.17 
   3 -11   6    0.20    0.17 
   3 -11   5    0.34    0.19 
   3 -11   4    0.39    0.20 
   3 -11   3   -0.21    0.18 
   3 -11   3   -0.04    0.10 
   3 -11   2    0.41    0.16 
   3 -11   2    0.08    0.13 
   3 -11   1    0.29    0.15 
   3 -11   1   -0.01    0.13 
   3 -11   0    0.04    0.14 
   3 -11  -1    0.56    0.21 
   3 -11  -2    0.61    0.25 
   3 -11  -3    0.11    0.23 
   3 -11  -4    0.17    0.17 
   3 -12   6    0.00    0.18 
   3 -12   5   -0.07    0.16 
   3 -12   4   -0.10    0.18 
   3 -12   3   -0.21    0.18 
   3 -12   2    0.34    0.18 
   3 -12   2   -0.54    0.28 
   3 -12   1    0.33    0.21 
   3 -12   0   -0.03    0.15 
   3 -12  -1   -0.03    0.15 
   3 -12  -2   -0.18    0.17 
   3 -13   4    0.65    0.24 
   3 -13   1   -0.39    0.26 
   3 -13   0    0.18    0.18 
  -4 -13  -4    0.32    0.19 
  -4 -13  -3    0.06    0.14 
  -4 -13  -2    0.39    0.20 
  -4 -13   1   -0.05    0.16 
  -4 -12  -7   -0.77    0.27 
  -4 -12  -6    0.03    0.18 
  -4 -12  -6   -0.31    0.22 
  -4 -12  -5    0.31    0.17 
  -4 -12  -5    0.06    0.16 
  -4 -12  -4    1.11    0.27 
  -4 -12  -3    1.03    0.30 
  -4 -12  -2    2.03    0.36 
  -4 -12  -1    0.87    0.25 
  -4 -12  -1    0.65    0.22 
  -4 -12   0    0.08    0.13 
  -4 -12   1    0.84    0.26 
  -4 -12   2    0.05    0.16 
  -4 -11  -8   -0.33    0.24 
  -4 -11  -7    0.25    0.16 
  -4 -11  -7    0.11    0.16 
  -4 -11  -6    1.26    0.34 
  -4 -11  -6    1.14    0.29 
  -4 -11  -5    0.52    0.22 
  -4 -11  -5    0.06    0.11 
  -4 -11  -4    1.42    0.29 
  -4 -11  -4    2.30    0.38 
  -4 -11  -3   -0.26    0.16 
  -4 -11  -3   -0.03    0.13 
  -4 -11  -2    0.34    0.16 
  -4 -11  -2    0.03    0.13 
  -4 -11  -1    0.08    0.13 
  -4 -11  -1   -0.04    0.11 
  -4 -11   0    0.28    0.16 
  -4 -11   0    0.20    0.14 
  -4 -11   1    0.24    0.18 
  -4 -11   2    0.44    0.21 
  -4 -11   3    0.11    0.17 
  -4 -11   3    0.06    0.18 
  -4 -11   4    0.05    0.16 
  -4 -10  -9    0.32    0.20 
  -4 -10  -8    0.98    0.29 
  -4 -10  -8    1.22    0.35 
  -4 -10  -7    0.75    0.24 
  -4 -10  -7    1.18    0.33 
  -4 -10  -6    0.11    0.12 
  -4 -10  -5    0.10    0.12 
  -4 -10  -4   -0.07    0.11 
  -4 -10  -4    0.24    0.13 
  -4 -10  -3   -0.10    0.12 
  -4 -10  -3   -0.08    0.10 
  -4 -10  -2    1.70    0.25 
  -4 -10  -2    1.35    0.26 
  -4 -10  -1    3.26    0.38 
  -4 -10   0    0.48    0.20 
  -4 -10   0    0.30    0.12 
  -4 -10   1    0.79    0.24 
  -4 -10   1    0.63    0.17 
  -4 -10   2    0.39    0.17 
  -4 -10   3    0.89    0.28 
  -4 -10   4   -0.05    0.15 
  -4 -10   4    0.03    0.15 
  -4 -10   5    0.27    0.25 
  -4 -10   6    0.11    0.21 
  -4  -9 -10    0.31    0.20 
  -4  -9 -10    0.75    0.27 
  -4  -9  -9   -0.05    0.14 
  -4  -9  -9    0.37    0.25 
  -4  -9  -8    0.13    0.15 
  -4  -9  -7    0.78    0.20 
  -4  -9  -7    0.55    0.21 
  -4  -9  -6    0.28    0.15 
  -4  -9  -6    0.28    0.17 
  -4  -9  -5    0.87    0.23 
  -4  -9  -5    0.39    0.19 
  -4  -9  -4    1.16    0.26 
  -4  -9  -4    0.83    0.20 
  -4  -9  -3    5.62    0.46 
  -4  -9  -3    5.47    0.45 
  -4  -9  -2    2.88    0.35 
  -4  -9  -2    3.08    0.32 
  -4  -9  -1    6.02    0.51 
  -4  -9  -1    5.87    0.40 
  -4  -9   0    2.39    0.34 
  -4  -9   1    1.94    0.31 
  -4  -9   2    2.98    0.40 
  -4  -9   2    2.98    0.29 
  -4  -9   3   -0.34    0.22 
  -4  -9   4    0.01    0.12 
  -4  -9   4   -0.23    0.18 
  -4  -9   5    2.12    0.39 
  -4  -9   5    1.20    0.29 
  -4  -9   6    0.60    0.25 
  -4  -9   7    0.98    0.31 
  -4  -8 -11    0.08    0.18 
  -4  -8 -10    0.29    0.20 
  -4  -8 -10   -0.17    0.17 
  -4  -8  -9    0.07    0.15 
  -4  -8  -8    0.66    0.18 
  -4  -8  -8    0.28    0.17 
  -4  -8  -7   -0.01    0.09 
  -4  -8  -7   -0.09    0.14 
  -4  -8  -6    0.17    0.13 
  -4  -8  -6    0.55    0.21 
  -4  -8  -5    1.72    0.28 
  -4  -8  -5    1.51    0.26 
  -4  -8  -4    4.51    0.44 
  -4  -8  -4    4.82    0.44 
  -4  -8  -3    0.07    0.15 
  -4  -8  -3    0.06    0.10 
  -4  -8  -2    2.76    0.37 
  -4  -8  -2    3.33    0.32 
  -4  -8  -1    0.18    0.11 
  -4  -8  -1    0.27    0.16 
  -4  -8   0   11.28    0.70 
  -4  -8   1    2.73    0.37 
  -4  -8   2   -0.02    0.15 
  -4  -8   3    8.41    0.67 
  -4  -8   4    0.56    0.24 
  -4  -8   4    0.45    0.25 
  -4  -8   5    1.58    0.33 
  -4  -8   5    0.70    0.22 
  -4  -8   6    0.09    0.18 
  -4  -8   7    0.39    0.24 
  -4  -8   8    0.15    0.17 
  -4  -7 -12    0.54    0.25 
  -4  -7 -11    0.05    0.10 
  -4  -7 -11    0.15    0.15 
  -4  -7 -11    0.32    0.23 
  -4  -7 -10    1.01    0.29 
  -4  -7 -10    1.22    0.25 
  -4  -7  -9    0.53    0.15 
  -4  -7  -9    0.65    0.24 
  -4  -7  -8    0.25    0.17 
  -4  -7  -8    0.06    0.11 
  -4  -7  -8    0.08    0.08 
  -4  -7  -7    1.05    0.27 
  -4  -7  -7    0.68    0.16 
  -4  -7  -6    8.94    0.57 
  -4  -7  -6    8.57    0.63 
  -4  -7  -5    0.60    0.18 
  -4  -7  -5    0.65    0.16 
  -4  -7  -4    8.19    0.55 
  -4  -7  -4    8.78    0.57 
  -4  -7  -3    2.20    0.27 
  -4  -7  -3    2.67    0.33 
  -4  -7  -2    2.97    0.36 
  -4  -7  -2    3.32    0.30 
  -4  -7  -1    7.27    0.54 
  -4  -7  -1    6.85    0.39 
  -4  -7   0    0.63    0.19 
  -4  -7   0    1.05    0.26 
  -4  -7   1    9.97    0.64 
  -4  -7   2    6.41    0.54 
  -4  -7   3    0.71    0.20 
  -4  -7   4    0.18    0.18 
  -4  -7   5    0.00    0.15 
  -4  -7   5    0.02    0.14 
  -4  -7   6    0.10    0.17 
  -4  -7   6   -0.10    0.17 
  -4  -7   7    0.61    0.25 
  -4  -7   8    1.05    0.31 
  -4  -7   9   -0.02    0.16 
   4   7 -10   -0.03    0.16 
  -4  -6 -13    0.53    0.23 
  -4  -6 -12    0.48    0.30 
  -4  -6 -12    0.47    0.20 
  -4  -6 -12    0.83    0.26 
  -4  -6 -11   -0.13    0.14 
  -4  -6 -11    0.15    0.16 
  -4  -6 -10    0.37    0.16 
  -4  -6 -10    0.52    0.22 
  -4  -6  -9    1.26    0.24 
  -4  -6  -9    1.24    0.22 
  -4  -6  -9    1.34    0.30 
  -4  -6  -8    5.12    0.42 
  -4  -6  -8    5.25    0.53 
  -4  -6  -8    5.28    0.42 
  -4  -6  -7    5.91    0.44 
  -4  -6  -7    5.74    0.54 
  -4  -6  -7    5.66    0.40 
  -4  -6  -6   10.91    0.49 
  -4  -6  -6   10.69    0.60 
  -4  -6  -6   10.47    0.67 
  -4  -6  -5    8.73    0.54 
  -4  -6  -5    8.65    0.57 
  -4  -6  -4    2.04    0.28 
  -4  -6  -4    1.08    0.21 
  -4  -6  -3   14.55    0.70 
  -4  -6  -3   13.80    0.63 
  -4  -6  -2    0.75    0.16 
  -4  -6  -2    0.83    0.20 
  -4  -6  -1    3.52    0.37 
  -4  -6   0    2.35    0.30 
  -4  -6   0    1.93    0.28 
  -4  -6   1    3.00    0.34 
  -4  -6   1    2.88    0.33 
  -4  -6   2    2.62    0.34 
  -4  -6   2    2.96    0.25 
  -4  -6   3    0.60    0.20 
  -4  -6   3    0.83    0.14 
  -4  -6   4    0.71    0.24 
  -4  -6   5    0.45    0.19 
  -4  -6   5    0.58    0.23 
  -4  -6   6   -0.14    0.17 
  -4  -6   6    0.07    0.15 
  -4  -6   7   -0.01    0.12 
  -4  -6   8    0.16    0.14 
  -4  -6   9    0.01    0.14 
   4   6  -9    0.00    0.12 
  -4  -6  10    0.14    0.19 
   4   6 -10    0.22    0.15 
  -4  -5 -13    0.36    0.18 
  -4  -5 -13    0.43    0.19 
  -4  -5 -12    0.74    0.25 
  -4  -5 -12    1.01    0.27 
  -4  -5 -11    0.93    0.29 
  -4  -5 -11    1.43    0.29 
  -4  -5 -10    0.37    0.18 
  -4  -5 -10    0.00    0.09 
  -4  -5 -10    0.11    0.14 
  -4  -5  -9    6.49    0.47 
  -4  -5  -9    5.64    0.48 
  -4  -5  -9    6.01    0.58 
  -4  -5  -8   -0.08    0.11 
  -4  -5  -8    0.06    0.09 
  -4  -5  -8    0.08    0.15 
  -4  -5  -7    0.36    0.13 
  -4  -5  -7    0.18    0.11 
  -4  -5  -7    0.56    0.21 
  -4  -5  -6    7.85    0.56 
  -4  -5  -6    8.42    0.43 
  -4  -5  -6    8.70    0.52 
  -4  -5  -5    1.94    0.28 
  -4  -5  -5    2.04    0.19 
  -4  -5  -5    2.13    0.27 
  -4  -5  -4   -0.12    0.10 
  -4  -5  -4   -0.02    0.04 
  -4  -5  -4   -0.05    0.09 
  -4  -5  -3    3.32    0.32 
  -4  -5  -3    3.26    0.30 
  -4  -5  -2    0.61    0.16 
  -4  -5  -2    0.66    0.15 
  -4  -5  -1    8.62    0.52 
  -4  -5   0    2.64    0.31 
   4   5   0    2.04    0.11 
  -4  -5   1    6.59    0.48 
  -4  -5   1    6.85    0.49 
   4   5  -2    0.56    0.08 
  -4  -5   2    0.62    0.19 
  -4  -5   2    0.61    0.12 
  -4  -5   3    3.60    0.40 
  -4  -5   3    3.45    0.24 
   4   5  -3    3.36    0.17 
  -4  -5   4    0.02    0.11 
  -4  -5   4    0.28    0.06 
  -4  -5   5   -0.03    0.12 
  -4  -5   5   -0.05    0.13 
  -4  -5   6    0.15    0.18 
  -4  -5   6    0.48    0.19 
  -4  -5   7    0.12    0.14 
  -4  -5   8   -0.07    0.16 
   4   5  -8    0.09    0.13 
  -4  -5   9    0.17    0.14 
   4   5  -9    0.00    0.15 
   4   5 -10    0.07    0.12 
  -4  -5  10    0.46    0.21 
  -4  -4 -14    0.71    0.26 
  -4  -4 -13    0.48    0.23 
  -4  -4 -13    0.82    0.25 
  -4  -4 -13    0.82    0.25 
  -4  -4 -12    0.31    0.21 
  -4  -4 -12    0.60    0.23 
  -4  -4 -11    2.50    0.41 
  -4  -4 -11    1.86    0.34 
  -4  -4 -10    0.08    0.16 
  -4  -4 -10   -0.05    0.09 
  -4  -4  -9    0.67    0.17 
  -4  -4  -9    0.66    0.21 
  -4  -4  -8    0.04    0.13 
  -4  -4  -8    0.10    0.12 
  -4  -4  -7    2.84    0.30 
  -4  -4  -7    3.05    0.36 
  -4  -4  -6    0.17    0.15 
  -4  -4  -6    0.19    0.11 
  -4  -4  -5    0.23    0.12 
  -4  -4  -5    0.23    0.10 
  -4  -4  -4   21.60    0.76 
  -4  -4  -4   21.77    0.48 
  -4  -4  -4   21.16    0.78 
  -4  -4  -3    0.13    0.11 
  -4  -4  -3    0.02    0.02 
  -4  -4  -3    0.19    0.12 
  -4  -4  -2   77.23    1.43 
  -4  -4  -2   77.68    1.27 
  -4  -4  -1    2.54    0.27 
   4   4   1    2.45    0.21 
   4   4   0    1.62    0.10 
  -4  -4   0    1.27    0.20 
   4   4   0    1.80    0.17 
   4   4  -1    0.56    0.09 
   4   4  -1    0.51    0.09 
  -4  -4   1    0.47    0.11 
  -4  -4   1    0.73    0.18 
  -4  -4   2    0.26    0.11 
  -4  -4   2    0.35    0.14 
  -4  -4   2    0.38    0.10 
   4   4  -2    0.24    0.09 
  -4  -4   3    2.85    0.34 
  -4  -4   3    2.65    0.21 
  -4  -4   4    1.75    0.17 
  -4  -4   4    1.86    0.30 
  -4  -4   5    7.92    0.56 
  -4  -4   5    7.54    0.59 
  -4  -4   6   -0.07    0.14 
  -4  -4   6    0.00    0.11 
   4   4  -6    0.05    0.10 
  -4  -4   7    2.29    0.33 
   4   4  -7    2.87    0.39 
  -4  -4   8    0.27    0.15 
   4   4  -8    0.34    0.19 
   4   4  -9    0.30    0.17 
  -4  -4   9   -0.11    0.15 
   4   4 -10    0.03    0.13 
  -4  -4  10   -0.04    0.12 
  -4  -3 -13   -0.19    0.21 
  -4  -3 -13   -0.01    0.12 
  -4  -3 -12    0.04    0.13 
  -4  -3 -11    0.36    0.20 
  -4  -3 -11   -0.01    0.09 
  -4  -3 -10    0.78    0.19 
  -4  -3 -10    0.80    0.23 
  -4  -3  -9    0.55    0.15 
  -4  -3  -9    0.74    0.22 
  -4  -3  -8    0.27    0.15 
  -4  -3  -8    0.14    0.10 
  -4  -3  -7    1.27    0.25 
  -4  -3  -7    1.30    0.21 
  -4  -3  -6    7.38    0.45 
  -4  -3  -5    4.48    0.35 
  -4  -3  -4   97.22    1.54 
  -4  -3  -3   12.15    0.55 
   4   3   3   11.86    0.51 
  -4  -3  -3   11.95    0.53 
   4   3   2    0.78    0.14 
  -4  -3  -2    0.90    0.18 
   4   3   1    0.36    0.10 
  -4  -3  -1    0.36    0.13 
  -4  -3   0    0.28    0.09 
  -4  -3   0    0.55    0.15 
   4   3  -1    0.81    0.11 
  -4  -3   1    1.11    0.16 
  -4  -3   1    0.84    0.16 
  -4  -3   2    7.55    0.48 
  -4  -3   2    7.72    0.45 
  -4  -3   2    7.50    0.38 
   4   3  -2    7.32    0.37 
  -4  -3   3    7.05    0.49 
  -4  -3   3    7.03    0.35 
   4   3  -3    7.42    0.42 
   4   3  -4    1.32    0.21 
  -4  -3   4    1.39    0.16 
  -4  -3   4    1.35    0.25 
  -4  -3   5    5.47    0.43 
   4   3  -5    5.90    0.35 
  -4  -3   5    6.08    0.32 
   4   3  -5    5.90    0.47 
  -4  -3   5    5.48    0.48 
  -4  -3   6   -0.10    0.11 
   4   3  -6    0.08    0.10 
  -4  -3   6    0.04    0.10 
   4   3  -6    0.07    0.07 
   4   3  -7    0.63    0.22 
  -4  -3   7    0.35    0.15 
  -4  -3   8    0.76    0.21 
   4   3  -8    1.25    0.29 
  -4  -3   9    0.15    0.14 
   4   3  -9    0.18    0.17 
   4   3 -10    0.53    0.25 
  -4  -2 -14    0.05    0.14 
  -4  -2 -13    0.02    0.13 
  -4  -2 -12    0.09    0.13 
  -4  -2 -11    0.65    0.18 
  -4  -2 -11    0.68    0.23 
  -4  -2 -10    3.27    0.36 
  -4  -2 -10    3.34    0.42 
  -4  -2  -9    0.56    0.20 
  -4  -2  -9    0.75    0.18 
  -4  -2  -8    1.80    0.25 
  -4  -2  -8    1.53    0.27 
  -4  -2  -7    3.41    0.33 
  -4  -2  -7    3.42    0.35 
  -4  -2  -6   15.14    0.64 
  -4  -2  -5    3.14    0.28 
  -4  -2  -4    0.59    0.15 
  -4  -2  -3   12.43    0.53 
   4   2   3   13.43    0.53 
  -4  -2  -2    1.38    0.19 
   4   2   2    1.42    0.18 
  -4  -2  -1   14.49    0.56 
  -4  -2  -1   13.21    0.52 
  -4  -2  -1   14.12    0.33 
  -4  -2   0    9.85    0.46 
  -4  -2   0    9.89    0.46 
   4   2   0   10.20    0.46 
  -4  -2   0   10.39    0.34 
   4   2  -1    0.81    0.14 
  -4  -2   1    0.84    0.16 
   4   2  -1    0.94    0.15 
  -4  -2   1    0.77    0.17 
  -4  -2   2    1.77    0.19 
  -4  -2   2    1.79    0.23 
   4   2  -2    1.64    0.19 
   4   2  -2    1.58    0.20 
   4   2  -2    1.48    0.18 
  -4  -2   2    1.50    0.19 
  -4  -2   3    2.50    0.25 
   4   2  -3    2.55    0.24 
  -4  -2   3    2.43    0.21 
   4   2  -3    2.36    0.26 
  -4  -2   3    2.55    0.28 
  -4  -2   4    7.63    0.51 
  -4  -2   4    6.97    0.44 
   4   2  -4    8.08    0.43 
  -4  -2   4    7.46    0.38 
   4   2  -4    7.32    0.47 
  -4  -2   5    0.02    0.09 
   4   2  -5   -0.12    0.13 
   4   2  -5    0.02    0.07 
  -4  -2   5    0.03    0.06 
  -4  -2   5   -0.10    0.16 
  -4  -2   6    2.43    0.34 
  -4  -2   6    2.51    0.29 
   4   2  -6    2.47    0.27 
   4   2  -6    2.71    0.36 
  -4  -2   7    0.53    0.16 
   4   2  -7    0.68    0.23 
   4   2  -7    0.92    0.18 
   4   2  -8    2.09    0.37 
  -4  -2   8    1.48    0.25 
   4   2  -9    0.53    0.24 
   4   2 -10    0.54    0.24 
  -4  -1 -14   -0.02    0.14 
  -4  -1 -13   -0.12    0.16 
  -4  -1 -12    0.46    0.23 
  -4  -1 -12    0.53    0.19 
  -4  -1 -11    0.13    0.14 
  -4  -1 -11    0.13    0.15 
  -4  -1 -10    0.36    0.14 
  -4  -1 -10    0.58    0.17 
  -4  -1  -9    0.21    0.13 
  -4  -1  -9    0.20    0.13 
  -4  -1  -8    1.01    0.22 
  -4  -1  -8    1.29    0.22 
  -4  -1  -7   15.12    0.68 
  -4  -1  -7   15.50    0.72 
  -4  -1  -6    1.68    0.22 
  -4  -1  -6    2.06    0.26 
  -4  -1  -5   13.62    0.58 
  -4  -1  -4   19.20    0.67 
  -4  -1  -3   50.22    1.02 
   4   1   3   50.94    1.03 
  -4  -1  -2   10.61    0.46 
  -4  -1  -1   18.42    0.59 
   4   1   0    5.72    0.36 
  -4  -1   0    5.62    0.35 
  -4  -1   0    5.24    0.31 
   4   1   0    5.80    0.33 
  -4  -1   0    5.51    0.28 
  -4  -1   1    3.33    0.26 
   4   1  -1    3.49    0.29 
  -4  -1   1    3.49    0.28 
   4   1  -1    3.64    0.26 
  -4  -1   1    3.44    0.25 
   4   1  -2   19.98    0.66 
  -4  -1   2   20.29    0.61 
   4   1  -2   20.72    0.69 
   4   1  -2   20.56    0.62 
  -4  -1   2   21.14    0.65 
  -4  -1   3    3.64    0.32 
   4   1  -3    3.59    0.26 
  -4  -1   3    3.42    0.26 
   4   1  -3    3.42    0.29 
  -4  -1   3    3.41    0.27 
   4   1  -3    3.68    0.32 
  -4  -1   4    0.19    0.09 
  -4  -1   4    0.17    0.13 
   4   1  -4    0.27    0.11 
  -4  -1   4    0.31    0.11 
   4   1  -4    0.21    0.08 
   4   1  -4    0.19    0.11 
  -4  -1   5    0.05    0.10 
  -4  -1   5    0.04    0.08 
   4   1  -5    0.07    0.08 
   4   1  -5    0.05    0.12 
   4   1  -5   -0.06    0.06 
  -4  -1   6    2.61    0.33 
  -4  -1   6    2.04    0.24 
   4   1  -6    2.31    0.28 
  -4  -1   7    1.15    0.20 
   4   1  -7    1.14    0.19 
   4   1  -7    1.39    0.30 
  -4  -1   8    0.28    0.13 
   4   1  -8    0.16    0.19 
   4   1  -9    0.10    0.15 
   4   1 -10    0.51    0.26 
  -4   0 -14    0.12    0.14 
  -4   0 -13   -0.07    0.13 
  -4   0 -12   -0.03    0.14 
  -4   0 -12    0.14    0.13 
  -4   0 -11    0.22    0.15 
  -4   0 -11    0.21    0.13 
   4   0  10    0.00    0.13 
  -4   0 -10    0.16    0.14 
  -4   0 -10    0.03    0.09 
   4   0   9    0.83    0.20 
  -4   0  -9    0.58    0.19 
  -4   0  -9    0.67    0.19 
   4   0   8    0.62    0.20 
  -4   0  -8    0.90    0.20 
  -4   0  -8    0.74    0.18 
   4   0   7    4.39    0.41 
  -4   0  -7    5.38    0.42 
  -4   0  -7    5.09    0.41 
  -4   0  -6   20.08    0.76 
  -4   0  -5   15.40    0.64 
  -4   0  -4   15.46    0.60 
   4   0   4   16.57    0.61 
  -4   0  -3    0.58    0.14 
  -4   0  -2   42.94    0.90 
   4   0   1   30.17    0.83 
  -4   0  -1   29.48    0.72 
   4   0   1   32.09    0.75 
  -4   0   0   58.31    0.99 
   4   0   0   57.81    1.16 
  -4   0   0   58.85    1.12 
  -4   0   0   59.13    0.98 
   4   0   0   58.07    0.97 
   4   0  -1    0.88    0.13 
   4   0  -1    0.91    0.17 
  -4   0   1    0.94    0.16 
  -4   0   1    0.92    0.14 
  -4   0   1    0.98    0.13 
  -4   0   2    2.04    0.18 
   4   0  -2    2.05    0.24 
   4   0  -2    2.29    0.26 
  -4   0   2    2.08    0.22 
   4   0  -2    2.10    0.18 
   4   0  -3    4.29    0.36 
  -4   0   3    4.72    0.27 
   4   0  -3    4.58    0.36 
   4   0  -3    4.51    0.27 
  -4   0   3    4.17    0.33 
  -4   0   4    7.36    0.44 
   4   0  -4    6.98    0.44 
   4   0  -4    6.64    0.33 
  -4   0   4    6.82    0.33 
   4   0  -4    7.06    0.50 
   4   0  -5    0.75    0.11 
  -4   0   5    0.90    0.19 
   4   0  -5    0.53    0.18 
  -4   0   5    0.65    0.13 
   4   0  -5    0.69    0.15 
  -4   0   6    2.20    0.23 
   4   0  -6    2.15    0.33 
   4   0  -6    1.83    0.25 
  -4   0   6    1.90    0.27 
  -4   0   7    1.24    0.18 
   4   0  -7    1.36    0.30 
   4   0  -7    0.89    0.19 
   4   0  -8    4.49    0.42 
   4   0  -8    4.67    0.54 
   4   0  -9    0.92    0.24 
   4   0 -10    0.49    0.26 
  -4   1 -13    0.14    0.14 
  -4   1 -13    0.49    0.18 
   4  -1  13    0.21    0.16 
   4  -1  12    0.90    0.25 
  -4   1 -12    0.68    0.20 
  -4   1 -12    0.66    0.20 
  -4   1 -11   -0.06    0.15 
   4  -1  11    0.31    0.20 
  -4   1 -10   -0.14    0.16 
   4  -1  10    0.17    0.13 
   4  -1   9   -0.05    0.13 
  -4   1  -9    0.02    0.11 
   4  -1   8    3.77    0.40 
   4  -1   7    1.60    0.26 
   4  -1   6    0.69    0.19 
   4  -1   5   22.52    0.77 
  -4   1  -5   22.55    0.75 
   4  -1   4    5.42    0.36 
  -4   1  -4    5.73    0.38 
   4  -1   4    5.35    0.36 
  -4   1  -3   44.45    0.92 
  -4   1  -3   42.22    1.00 
  -4   1  -3   41.73    0.96 
  -4   1  -2   48.86    0.90 
   4  -1   2   49.08    1.08 
  -4   1  -2   50.28    0.98 
  -4   1  -1   10.98    0.38 
   4  -1   1   11.07    0.52 
  -4   1  -1   10.15    0.42 
   4  -1   0    6.36    0.41 
  -4   1   0    6.67    0.32 
  -4   1   1    0.02    0.05 
   4  -1  -1   -0.01    0.05 
   4  -1  -1    0.08    0.12 
  -4   1   1    0.15    0.13 
   4  -1  -2    0.31    0.07 
   4  -1  -2    0.25    0.12 
  -4   1   2    0.19    0.06 
  -4   1   3    2.17    0.22 
  -4   1   3    1.93    0.15 
   4  -1  -3    2.01    0.26 
   4  -1  -3    1.95    0.15 
   4  -1  -3    1.83    0.24 
  -4   1   3    1.95    0.14 
  -4   1   4    2.76    0.27 
  -4   1   4    2.66    0.17 
   4  -1  -4    2.48    0.28 
   4  -1  -4    3.46    0.36 
   4  -1  -4    2.61    0.17 
   4  -1  -5    0.23    0.16 
  -4   1   5    0.08    0.09 
  -4   1   5    0.15    0.06 
   4  -1  -5    0.29    0.06 
   4  -1  -5    0.16    0.13 
   4  -1  -6   20.11    0.85 
  -4   1   6   19.78    0.55 
   4  -1  -6   19.04    0.95 
   4  -1  -7    2.38    0.31 
   4  -1  -7    3.08    0.42 
   4  -1  -8    0.25    0.18 
   4  -1  -8    0.21    0.13 
   4  -1  -9    0.43    0.20 
   4  -1  -9    0.21    0.13 
   4  -1 -10   -0.03    0.17 
   4  -2  14    0.37    0.22 
   4  -2  13    0.01    0.13 
   4  -2  12    0.10    0.14 
   4  -2  11    0.10    0.14 
   4  -2  10   -0.05    0.14 
   4  -2   9    0.12    0.14 
   4  -2   8    0.24    0.15 
   4  -2   7    4.36    0.42 
   4  -2   6   -0.01    0.11 
   4  -2   5    0.31    0.14 
  -4   2  -5    0.30    0.11 
   4  -2   4    0.08    0.09 
  -4   2  -4    0.00    0.08 
   4  -2   3   11.17    0.48 
  -4   2  -3   11.99    0.49 
   4  -2   3   11.71    0.55 
  -4   2  -3   11.35    0.52 
  -4   2  -2    3.48    0.25 
   4  -2   2    3.43    0.25 
   4  -2   2    3.19    0.30 
   4  -2   1   43.89    1.07 
  -4   2  -1   44.80    0.91 
  -4   2  -1   45.56    0.77 
  -4   2   0   94.13    1.20 
  -4   2   0   93.88    0.96 
   4  -2   0   93.15    1.58 
  -4   2   1    5.74    0.19 
   4  -2  -1    5.15    0.39 
  -4   2   1    5.32    0.27 
   4  -2  -2    9.89    0.55 
  -4   2   2   10.10    0.33 
  -4   2   3    1.49    0.16 
  -4   2   3    1.72    0.12 
   4  -2  -3    1.66    0.26 
   4  -2  -4   17.76    0.82 
   4  -2  -4   18.00    0.79 
  -4   2   4   17.86    0.59 
   4  -2  -5    0.88    0.23 
  -4   2   5    0.70    0.06 
   4  -2  -5    1.23    0.23 
  -4   2   5    0.84    0.15 
   4  -2  -6    0.25    0.15 
   4  -2  -6    0.26    0.17 
   4  -2  -7    1.58    0.32 
   4  -2  -7    1.95    0.31 
   4  -2  -8    0.07    0.15 
   4  -2  -8   -0.02    0.11 
   4  -2  -9    0.63    0.26 
   4  -2  -9    0.15    0.18 
   4  -2 -10    0.26    0.23 
   4  -3  13   -0.11    0.15 
   4  -3  12    0.05    0.13 
   4  -3  11   -0.21    0.17 
   4  -3  10    0.04    0.14 
   4  -3   9    0.69    0.23 
   4  -3   8    2.71    0.37 
   4  -3   7    1.05    0.23 
   4  -3   6    9.35    0.57 
   4  -3   5    8.78    0.52 
  -4   3  -5    9.12    0.47 
   4  -3   4   20.16    0.73 
  -4   3  -4   21.44    0.71 
   4  -3   4   20.68    0.72 
  -4   3  -3    4.20    0.30 
   4  -3   3    4.19    0.37 
   4  -3   3    4.18    0.31 
   4  -3   2  162.90    1.70 
  -4   3  -2  165.40    1.71 
   4  -3   2  163.75    2.11 
  -4   3  -1    1.55    0.15 
   4  -3   1    1.66    0.24 
   4  -3   1    1.41    0.15 
  -4   3   0   18.28    0.43 
   4  -3   0   17.51    0.71 
  -4   3   1    5.67    0.17 
   4  -3  -1    5.48    0.42 
  -4   3   1    6.18    0.30 
   4  -3  -2    5.50    0.43 
  -4   3   2    5.93    0.25 
  -4   3   3    1.79    0.16 
  -4   3   3    1.53    0.10 
   4  -3  -3    1.54    0.25 
   4  -3  -4    3.21    0.36 
  -4   3   4    2.87    0.21 
   4  -3  -5    1.13    0.24 
   4  -3  -6   -0.02    0.12 
   4  -3  -6   -0.02    0.12 
   4  -3  -7    0.28    0.20 
   4  -3  -7    0.13    0.12 
   4  -3  -8    1.44    0.29 
   4  -3  -8    1.28    0.31 
   4  -3  -9    0.15    0.17 
   4  -3  -9    0.20    0.17 
   4  -3 -10    0.56    0.21 
   4  -4  13    0.55    0.28 
   4  -4  12    0.03    0.14 
   4  -4  11    0.07    0.14 
   4  -4  10    0.35    0.23 
   4  -4   9    3.03    0.41 
   4  -4   8    8.07    0.62 
   4  -4   7    7.84    0.58 
   4  -4   6   12.44    0.67 
   4  -4   5    0.96    0.19 
   4  -4   5    0.70    0.19 
   4  -4   4    7.08    0.46 
   4  -4   4    7.00    0.46 
   4  -4   3    0.33    0.12 
   4  -4   3    0.42    0.16 
   4  -4   2    0.08    0.09 
  -4   4  -2    0.02    0.07 
   4  -4   2    0.14    0.14 
   4  -4   1    6.13    0.31 
  -4   4  -1    6.28    0.32 
   4  -4   1    6.20    0.45 
   4  -4   0    2.70    0.18 
  -4   4   0    2.88    0.18 
   4  -4   0    2.46    0.28 
   4  -4  -1    0.31    0.12 
   4  -4  -2   11.02    0.64 
  -4   4   2   11.24    0.37 
  -4   4   3    2.24    0.12 
   4  -4  -3    2.31    0.32 
  -4   4   3    2.21    0.14 
   4  -4  -4    1.79    0.29 
   4  -4  -5   -0.03    0.12 
   4  -4  -6    0.15    0.11 
   4  -4  -7    2.21    0.37 
   4  -4  -8    0.33    0.19 
   4  -4  -9    0.72    0.24 
   4  -4 -10    0.52    0.23 
   4  -5  12    1.82    0.38 
   4  -5  11    0.42    0.20 
   4  -5  10    3.13    0.45 
   4  -5   9    0.26    0.15 
   4  -5   8    4.51    0.49 
   4  -5   7   -0.03    0.14 
   4  -5   6    0.69    0.18 
   4  -5   5   21.48    0.87 
   4  -5   5   22.37    0.80 
   4  -5   4    4.88    0.40 
   4  -5   4    5.45    0.43 
   4  -5   3    4.42    0.35 
   4  -5   3    4.87    0.40 
   4  -5   2    2.29    0.24 
   4  -5   2    2.40    0.29 
   4  -5   1    5.47    0.32 
   4  -5   1    5.38    0.43 
   4  -5   0    8.86    0.36 
   4  -5   0    8.72    0.56 
   4  -5  -1    2.79    0.16 
   4  -5  -1    2.77    0.33 
  -4   5   2    1.05    0.13 
   4  -5  -2    0.74    0.20 
  -4   5   3    0.59    0.07 
  -4   5   3    0.72    0.08 
   4  -5  -3    0.66    0.21 
   4  -5  -4    7.10    0.59 
   4  -5  -5    8.43    0.66 
   4  -5  -6    2.07    0.35 
   4  -5  -7    0.22    0.18 
   4  -5  -8    0.85    0.25 
   4  -5  -9   -0.33    0.20 
   4  -5 -10    0.26    0.17 
   4  -6  12    0.57    0.28 
   4  -6  11    0.02    0.14 
   4  -6  10    0.56    0.28 
   4  -6   9    1.22    0.29 
   4  -6   8    1.27    0.31 
   4  -6   7    0.36    0.21 
   4  -6   6    1.37    0.28 
   4  -6   6    1.59    0.24 
   4  -6   5    1.90    0.30 
   4  -6   5    1.81    0.28 
   4  -6   4    1.28    0.24 
   4  -6   4    1.71    0.28 
   4  -6   3    3.84    0.35 
   4  -6   3    3.48    0.37 
   4  -6   2    0.26    0.12 
   4  -6   2    0.30    0.15 
   4  -6   1   23.55    0.72 
   4  -6   1   24.99    0.96 
   4  -6   0    0.94    0.13 
   4  -6   0    0.85    0.23 
   4  -6  -1   11.93    0.38 
   4  -6  -1   10.85    0.68 
  -4   6   1   10.47    0.27 
   4  -6  -2   10.17    0.68 
   4  -6  -3   17.00    0.92 
  -4   6   3   16.82    0.44 
   4  -6  -4    7.47    0.64 
   4  -6  -5    0.93    0.27 
   4  -6  -6    1.48    0.32 
   4  -6  -7   -0.14    0.15 
   4  -6  -8    0.16    0.19 
   4  -6  -9    0.56    0.23 
   4  -7  11    0.04    0.15 
   4  -7  10    0.72    0.25 
   4  -7   9    0.05    0.14 
   4  -7   8    1.08    0.26 
   4  -7   7    0.36    0.21 
   4  -7   6    0.69    0.21 
   4  -7   6    1.44    0.24 
   4  -7   5    0.41    0.20 
   4  -7   5    0.44    0.17 
   4  -7   4   10.57    0.64 
   4  -7   4   11.14    0.65 
   4  -7   3   17.43    0.77 
   4  -7   3   17.06    0.81 
   4  -7   2    2.08    0.26 
   4  -7   2    1.65    0.25 
   4  -7   1    2.52    0.26 
   4  -7   1    2.23    0.31 
  -4   7  -1    1.70    0.18 
   4  -7   0   15.53    0.57 
   4  -7   0   15.33    0.83 
   4  -7  -1    1.52    0.16 
   4  -7  -1    1.51    0.29 
   4  -7  -2    7.63    0.63 
   4  -7  -3    1.67    0.31 
   4  -7  -4    0.20    0.20 
   4  -7  -5    1.31    0.30 
   4  -7  -6    0.51    0.24 
   4  -7  -7    0.96    0.28 
   4  -7  -8    0.10    0.22 
   4  -8  10    0.53    0.28 
   4  -8   9    2.84    0.46 
   4  -8   8   -0.10    0.19 
   4  -8   7    2.95    0.42 
   4  -8   6    6.46    0.49 
   4  -8   6    6.33    0.58 
   4  -8   5   12.29    0.77 
   4  -8   5   12.86    0.72 
   4  -8   4    7.26    0.57 
   4  -8   4    6.65    0.53 
   4  -8   3    1.51    0.25 
   4  -8   3    1.69    0.28 
   4  -8   2   10.99    0.61 
   4  -8   2   10.55    0.67 
   4  -8   1    8.45    0.50 
   4  -8   1    8.70    0.64 
   4  -8   0    2.58    0.26 
   4  -8   0    3.05    0.41 
   4  -8  -1    0.32    0.17 
   4  -8  -2    0.23    0.18 
   4  -8  -3    0.27    0.16 
   4  -8  -4    0.72    0.26 
   4  -8  -5    0.03    0.19 
   4  -8  -6   -0.18    0.19 
   4  -8  -7    0.15    0.16 
   4  -9   9    0.39    0.18 
   4  -9   8    3.38    0.49 
   4  -9   7    1.12    0.30 
   4  -9   6    2.26    0.37 
   4  -9   5    1.29    0.28 
   4  -9   5    1.59    0.28 
   4  -9   4    1.23    0.27 
   4  -9   4    1.16    0.26 
   4  -9   3    5.57    0.50 
   4  -9   3    5.63    0.52 
   4  -9   2    1.84    0.26 
   4  -9   2    1.15    0.23 
   4  -9   1    0.09    0.10 
   4  -9   1    0.20    0.12 
   4  -9   0    0.32    0.12 
   4  -9   0    0.11    0.13 
   4  -9  -1    1.16    0.30 
   4  -9  -2    0.97    0.27 
   4  -9  -3    0.13    0.14 
   4  -9  -4    0.68    0.25 
   4  -9  -5    0.04    0.15 
   4  -9  -6    0.43    0.23 
   4 -10   8    0.22    0.21 
   4 -10   7    0.52    0.22 
   4 -10   6    0.13    0.15 
   4 -10   5    1.32    0.30 
   4 -10   4    0.14    0.13 
   4 -10   4    0.39    0.19 
   4 -10   3    1.20    0.25 
   4 -10   3    1.44    0.29 
   4 -10   2    0.03    0.10 
   4 -10   2   -0.35    0.23 
   4 -10   1    1.06    0.22 
   4 -10   1    0.75    0.23 
   4 -10   0    1.18    0.29 
   4 -10  -1    0.71    0.26 
   4 -10  -2    2.22    0.43 
   4 -10  -3    0.48    0.23 
   4 -10  -4    0.35    0.21 
   4 -11   7    0.50    0.24 
   4 -11   6    0.20    0.19 
   4 -11   5    1.24    0.30 
   4 -11   4    0.24    0.18 
   4 -11   3    0.38    0.18 
   4 -11   3    0.22    0.19 
   4 -11   2   -0.27    0.23 
   4 -11   1   -0.64    0.29 
   4 -11   0    0.50    0.23 
   4 -11  -1    0.37    0.22 
   4 -11  -2   -0.01    0.14 
   4 -11  -3   -0.22    0.19 
   4 -12   6    0.06    0.16 
   4 -12   5    0.56    0.23 
   4 -12   4    0.36    0.23 
   4 -12   2   -0.24    0.24 
   4 -12   1   -1.68    0.38 
   4 -12   0    0.09    0.16 
   4 -12  -1   -0.10    0.15 
   4 -13   1   -1.27    0.34 
  -5 -13  -4    0.40    0.21 
  -5 -13  -3    0.06    0.16 
  -5 -13   0    0.67    0.23 
  -5 -13   1    0.35    0.18 
  -5 -12  -7    0.00    0.17 
  -5 -12  -6    0.25    0.18 
  -5 -12  -6    0.35    0.26 
  -5 -12  -5    0.29    0.21 
  -5 -12  -4    0.21    0.19 
  -5 -12  -3    0.01    0.16 
  -5 -12  -2    1.86    0.33 
  -5 -12  -2    2.25    0.37 
  -5 -12  -1   -0.02    0.13 
  -5 -12   0    0.34    0.19 
  -5 -12   1   -0.03    0.14 
  -5 -12   2   -0.67    0.24 
  -5 -12   3    0.25    0.20 
  -5 -11  -8   -0.26    0.16 
  -5 -11  -7   -0.06    0.14 
  -5 -11  -7   -0.49    0.25 
  -5 -11  -6   -0.29    0.18 
  -5 -11  -5   -0.07    0.16 
  -5 -11  -4    0.52    0.18 
  -5 -11  -3    1.21    0.25 
  -5 -11  -2    0.17    0.15 
  -5 -11  -1    1.25    0.29 
  -5 -11   0    0.21    0.16 
  -5 -11   1    0.14    0.14 
  -5 -11   2    0.45    0.21 
  -5 -11   3    0.49    0.24 
  -5 -11   4    0.26    0.22 
  -5 -10  -9    0.06    0.17 
  -5 -10  -8    1.35    0.34 
  -5 -10  -7   -0.18    0.15 
  -5 -10  -7    0.23    0.16 
  -5 -10  -6   -0.12    0.13 
  -5 -10  -6    0.00    0.12 
  -5 -10  -5    0.34    0.18 
  -5 -10  -5    0.19    0.13 
  -5 -10  -4    0.07    0.09 
  -5 -10  -4   -0.03    0.15 
  -5 -10  -4    0.06    0.12 
  -5 -10  -3   -0.06    0.13 
  -5 -10  -3    0.17    0.15 
  -5 -10  -2    1.52    0.29 
  -5 -10  -2    2.27    0.30 
  -5 -10  -1    1.85    0.33 
  -5 -10   0    0.93    0.26 
  -5 -10   1    0.99    0.26 
  -5 -10   2    4.12    0.52 
  -5 -10   3    0.56    0.22 
  -5 -10   4    2.86    0.46 
  -5 -10   4    3.44    0.53 
  -5 -10   5    1.71    0.41 
  -5 -10   5    1.39    0.35 
  -5  -9 -10    0.29    0.16 
  -5  -9  -9    0.05    0.14 
  -5  -9  -8    0.65    0.23 
  -5  -9  -8    0.40    0.17 
  -5  -9  -7   -0.13    0.17 
  -5  -9  -7   -0.03    0.12 
  -5  -9  -6    0.56    0.21 
  -5  -9  -6    0.86    0.25 
  -5  -9  -5    0.01    0.11 
  -5  -9  -5   -0.18    0.15 
  -5  -9  -4    3.20    0.43 
  -5  -9  -4    2.92    0.36 
  -5  -9  -3    0.08    0.12 
  -5  -9  -3    0.36    0.20 
  -5  -9  -2    3.59    0.41 
  -5  -9  -2    3.37    0.44 
  -5  -9  -2    3.88    0.37 
  -5  -9  -1    1.19    0.27 
  -5  -9   0    4.57    0.49 
  -5  -9   1    0.29    0.20 
  -5  -9   2   10.10    0.77 
  -5  -9   3    1.08    0.30 
  -5  -9   4    0.18    0.20 
  -5  -9   4    0.36    0.23 
  -5  -9   5   -0.23    0.18 
  -5  -9   5    0.19    0.20 
  -5  -9   6    0.01    0.18 
  -5  -9   6    0.17    0.19 
  -5  -8 -10    0.33    0.20 
  -5  -8  -9    0.07    0.18 
  -5  -8  -9   -0.04    0.09 
  -5  -8  -8   -0.12    0.15 
  -5  -8  -8   -0.21    0.14 
  -5  -8  -7   -0.20    0.16 
  -5  -8  -7    0.16    0.12 
  -5  -8  -6    5.14    0.48 
  -5  -8  -6    4.68    0.49 
  -5  -8  -5    0.02    0.12 
  -5  -8  -5   -0.04    0.12 
  -5  -8  -4    9.54    0.66 
  -5  -8  -4    9.83    0.62 
  -5  -8  -3    0.17    0.13 
  -5  -8  -3    0.16    0.14 
  -5  -8  -2    1.27    0.26 
  -5  -8  -2    1.94    0.27 
  -5  -8  -1    0.28    0.14 
  -5  -8  -1    0.32    0.18 
  -5  -8   0    1.25    0.27 
  -5  -8   1   -0.05    0.13 
  -5  -8   2    0.43    0.18 
  -5  -8   3    0.15    0.16 
  -5  -8   4    2.20    0.41 
  -5  -8   5    1.77    0.37 
  -5  -8   5    2.00    0.39 
  -5  -8   6    0.08    0.13 
  -5  -8   6   -0.19    0.21 
  -5  -8   7    0.51    0.28 
  -5  -8   8   -0.18    0.19 
  -5  -7 -11    0.36    0.21 
  -5  -7 -10    0.06    0.14 
  -5  -7  -9    0.00    0.18 
  -5  -7  -9   -0.18    0.12 
  -5  -7  -8    4.22    0.36 
  -5  -7  -8    3.63    0.39 
  -5  -7  -8    4.01    0.49 
  -5  -7  -7   -0.06    0.11 
  -5  -7  -7   -0.05    0.10 
  -5  -7  -6   11.27    0.68 
  -5  -7  -6   12.68    0.76 
  -5  -7  -5    0.66    0.20 
  -5  -7  -5    0.25    0.17 
  -5  -7  -4    2.08    0.29 
  -5  -7  -4    2.13    0.32 
  -5  -7  -3    1.77    0.26 
  -5  -7  -3    1.22    0.26 
  -5  -7  -2    2.10    0.32 
  -5  -7  -1    0.97    0.24 
  -5  -7   0    4.65    0.46 
  -5  -7   0    4.30    0.46 
  -5  -7   1    1.25    0.27 
   5   7  -1    0.77    0.09 
  -5  -7   2    1.71    0.30 
   5   7  -2    1.99    0.19 
  -5  -7   3    4.83    0.52 
  -5  -7   4    0.10    0.13 
  -5  -7   5    1.69    0.34 
  -5  -7   5    1.20    0.28 
  -5  -7   6    0.02    0.16 
  -5  -7   6    0.36    0.20 
   5   7  -6   -0.11    0.13 
  -5  -7   7    0.67    0.26 
   5   7  -7    0.29    0.15 
  -5  -7   8    0.49    0.23 
  -5  -7   9    0.21    0.21 
  -5  -6 -12    0.10    0.15 
  -5  -6 -12    0.29    0.15 
  -5  -6 -11    0.28    0.20 
  -5  -6 -11    0.26    0.15 
  -5  -6 -10    0.90    0.26 
  -5  -6 -10    0.87    0.21 
  -5  -6 -10    0.92    0.21 
  -5  -6  -9    0.63    0.21 
  -5  -6  -9    0.82    0.19 
  -5  -6  -9    0.43    0.16 
  -5  -6  -8    0.08    0.10 
  -5  -6  -8    0.14    0.09 
  -5  -6  -7   10.99    0.65 
  -5  -6  -7   11.16    0.74 
  -5  -6  -7    9.86    0.49 
  -5  -6  -6    2.04    0.32 
  -5  -6  -6    1.42    0.25 
  -5  -6  -6    1.69    0.18 
  -5  -6  -5    1.76    0.26 
  -5  -6  -5    1.96    0.30 
  -5  -6  -4    6.32    0.50 
  -5  -6  -4    6.09    0.46 
  -5  -6  -3    2.67    0.34 
  -5  -6  -3    2.45    0.28 
  -5  -6  -2    0.80    0.20 
  -5  -6  -1    0.12    0.13 
  -5  -6   0   -0.09    0.11 
  -5  -6   1   11.83    0.72 
  -5  -6   1   12.66    0.72 
   5   6  -1   12.02    0.37 
  -5  -6   2    0.42    0.18 
   5   6  -2    0.41    0.11 
  -5  -6   2    0.42    0.13 
  -5  -6   3   12.12    0.76 
   5   6  -3   12.60    0.56 
   5   6  -4    0.97    0.19 
  -5  -6   4    0.87    0.25 
  -5  -6   5    2.51    0.40 
  -5  -6   5    2.59    0.38 
   5   6  -5    3.18    0.35 
  -5  -6   6   -0.02    0.17 
   5   6  -6    0.18    0.11 
   5   6  -7   -0.09    0.14 
  -5  -6   7   -0.12    0.17 
  -5  -6   8   -0.15    0.14 
   5   6  -8   -0.02    0.12 
  -5  -6   9    0.27    0.19 
   5   6  -9    0.25    0.17 
  -5  -5 -13    0.54    0.22 
  -5  -5 -12    0.31    0.24 
  -5  -5 -12    0.05    0.10 
  -5  -5 -11    0.12    0.13 
  -5  -5 -11    0.08    0.18 
  -5  -5 -10    4.53    0.43 
  -5  -5 -10    4.62    0.45 
  -5  -5 -10    4.78    0.54 
  -5  -5  -9    6.10    0.50 
  -5  -5  -9    5.59    0.46 
  -5  -5  -9    6.18    0.59 
  -5  -5  -8    6.13    0.48 
  -5  -5  -8    6.16    0.44 
  -5  -5  -8    5.81    0.54 
  -5  -5  -7    0.19    0.15 
  -5  -5  -7    0.17    0.09 
  -5  -5  -7   -0.04    0.11 
  -5  -5  -6    0.42    0.15 
  -5  -5  -6    0.75    0.13 
  -5  -5  -6    0.55    0.16 
  -5  -5  -5    4.38    0.40 
  -5  -5  -5    3.61    0.21 
  -5  -5  -5    3.29    0.35 
  -5  -5  -4    0.04    0.11 
  -5  -5  -4   -0.01    0.12 
  -5  -5  -3    2.14    0.26 
  -5  -5  -3    2.17    0.28 
  -5  -5  -2    0.15    0.12 
  -5  -5  -1    1.16    0.22 
  -5  -5   0    4.24    0.40 
   5   5   0    4.78    0.31 
   5   5  -1    1.11    0.14 
  -5  -5   1    1.09    0.23 
  -5  -5   1    1.68    0.29 
   5   5  -1    1.25    0.14 
  -5  -5   2    2.36    0.34 
  -5  -5   2    2.06    0.23 
  -5  -5   2    2.33    0.31 
   5   5  -2    1.96    0.20 
   5   5  -2    2.18    0.19 
   5   5  -3    0.10    0.08 
   5   5  -3   -0.04    0.05 
  -5  -5   3    0.01    0.06 
  -5  -5   4    0.19    0.17 
   5   5  -4   -0.02    0.09 
  -5  -5   5    0.37    0.17 
  -5  -5   5   -0.10    0.18 
   5   5  -5    0.04    0.09 
  -5  -5   6   -0.24    0.21 
  -5  -5   6    0.07    0.11 
   5   5  -6    0.18    0.13 
  -5  -5   7    0.54    0.19 
   5   5  -7    0.20    0.14 
  -5  -5   7    0.47    0.22 
  -5  -5   8   -0.09    0.13 
   5   5  -8    0.08    0.11 
  -5  -5   9   -0.10    0.15 
   5   5  -9   -0.14    0.17 
   5   5 -10    0.15    0.14 
  -5  -4 -14    0.34    0.19 
  -5  -4 -13   -0.14    0.16 
  -5  -4 -13    0.14    0.16 
  -5  -4 -12    2.12    0.40 
  -5  -4 -11    1.25    0.25 
  -5  -4 -11    1.55    0.32 
  -5  -4 -10    2.02    0.30 
  -5  -4 -10    1.54    0.31 
  -5  -4  -9    4.23    0.41 
  -5  -4  -9    4.17    0.47 
  -5  -4  -8    1.33    0.24 
  -5  -4  -8    0.92    0.23 
  -5  -4  -7    0.03    0.10 
  -5  -4  -7    0.17    0.14 
  -5  -4  -6    2.92    0.34 
  -5  -4  -6    2.59    0.31 
  -5  -4  -5   16.11    0.72 
  -5  -4  -5   15.32    0.72 
  -5  -4  -4    0.04    0.11 
  -5  -4  -4    0.10    0.12 
  -5  -4  -3    2.71    0.30 
  -5  -4  -2    1.74    0.25 
  -5  -4  -1    1.83    0.25 
   5   4   1    2.03    0.22 
  -5  -4   0    6.73    0.47 
   5   4   0    6.70    0.36 
   5   4  -1   11.38    0.41 
  -5  -4   1   11.04    0.60 
  -5  -4   1   11.09    0.54 
   5   4  -2    0.18    0.09 
  -5  -4   2    0.10    0.14 
  -5  -4   2    0.13    0.12 
  -5  -4   2    0.27    0.12 
  -5  -4   3    1.52    0.28 
  -5  -4   3    1.66    0.19 
   5   4  -3    1.81    0.22 
  -5  -4   4    0.16    0.15 
   5   4  -4    0.06    0.09 
  -5  -4   5    3.72    0.44 
  -5  -4   5    4.73    0.45 
   5   4  -5    4.07    0.40 
  -5  -4   6    0.60    0.20 
  -5  -4   6    0.99    0.24 
   5   4  -6    0.68    0.20 
  -5  -4   7    0.27    0.17 
   5   4  -7    0.25    0.16 
  -5  -4   7    0.14    0.14 
  -5  -4   8    0.17    0.13 
   5   4  -8   -0.28    0.19 
  -5  -4   9   -0.12    0.11 
   5   4  -9    0.15    0.17 
   5   4 -10   -0.17    0.18 
  -5  -3 -13    0.28    0.19 
  -5  -3 -12    0.95    0.25 
  -5  -3 -12    0.64    0.24 
  -5  -3 -11    2.83    0.42 
  -5  -3 -11    2.90    0.36 
  -5  -3 -10    1.63    0.33 
  -5  -3 -10    1.09    0.21 
  -5  -3  -9    0.51    0.17 
  -5  -3  -9    0.58    0.16 
  -5  -3  -8    1.64    0.25 
  -5  -3  -8    1.20    0.26 
  -5  -3  -7    0.61    0.17 
  -5  -3  -7    0.85    0.21 
  -5  -3  -6    0.15    0.12 
  -5  -3  -6   -0.05    0.12 
  -5  -3  -5    2.77    0.31 
  -5  -3  -5    3.02    0.33 
  -5  -3  -4   24.20    0.85 
  -5  -3  -3    1.25    0.21 
  -5  -3  -2    3.99    0.34 
  -5  -3  -2    3.56    0.15 
  -5  -3  -1   11.05    0.56 
   5   3   1   11.30    0.50 
  -5  -3   0    0.40    0.15 
   5   3  -1    1.78    0.17 
  -5  -3   1    2.33    0.27 
  -5  -3   1    1.84    0.22 
  -5  -3   2    1.45    0.24 
  -5  -3   2    1.75    0.25 
  -5  -3   2    1.40    0.19 
   5   3  -2    1.77    0.21 
  -5  -3   3    1.95    0.29 
  -5  -3   3    1.80    0.20 
  -5  -3   3    2.08    0.27 
   5   3  -3    1.96    0.25 
  -5  -3   4    3.36    0.38 
  -5  -3   4    3.79    0.30 
   5   3  -4    3.99    0.37 
  -5  -3   5    0.20    0.14 
  -5  -3   5    0.22    0.14 
   5   3  -5    0.44    0.17 
  -5  -3   6    2.29    0.35 
  -5  -3   6    2.10    0.30 
   5   3  -6    2.14    0.25 
   5   3  -6    2.04    0.32 
  -5  -3   7    0.14    0.13 
   5   3  -7   -0.06    0.17 
  -5  -3   7    0.12    0.15 
  -5  -3   8    0.26    0.16 
   5   3  -8    0.13    0.15 
   5   3  -9    0.01    0.14 
   5   3 -10    0.01    0.16 
  -5  -2 -14    0.02    0.13 
  -5  -2 -13    1.70    0.35 
  -5  -2 -12    0.78    0.23 
  -5  -2 -12    0.85    0.25 
  -5  -2 -11    0.22    0.17 
  -5  -2 -11    0.02    0.14 
  -5  -2 -10    1.83    0.29 
  -5  -2 -10    1.32    0.29 
  -5  -2  -9    3.57    0.37 
  -5  -2  -9    3.78    0.44 
  -5  -2  -8    0.25    0.14 
  -5  -2  -8   -0.03    0.11 
  -5  -2  -7    5.10    0.42 
  -5  -2  -7    5.37    0.46 
  -5  -2  -6   19.84    0.79 
  -5  -2  -6    8.47    0.55 
  -5  -2  -5   75.09    1.48 
  -5  -2  -4    0.11    0.11 
  -5  -2  -3   57.20    1.23 
  -5  -2  -2    0.83    0.18 
  -5  -2  -1    6.35    0.40 
  -5  -2  -1    6.56    0.28 
  -5  -2   0   39.23    0.98 
  -5  -2   0   39.07    0.77 
  -5  -2   1    6.40    0.41 
   5   2  -2    0.08    0.08 
  -5  -2   2    0.24    0.12 
   5   2  -2    0.06    0.07 
  -5  -2   3    4.10    0.39 
  -5  -2   3    4.50    0.35 
   5   2  -3    4.04    0.34 
   5   2  -3    4.09    0.35 
  -5  -2   4    3.71    0.39 
   5   2  -4    3.70    0.34 
   5   2  -4    4.29    0.39 
   5   2  -5    0.20    0.14 
   5   2  -5    0.36    0.13 
  -5  -2   5    0.39    0.13 
  -5  -2   5    0.23    0.15 
   5   2  -6    2.40    0.36 
  -5  -2   6    2.28    0.29 
  -5  -2   6    2.54    0.36 
   5   2  -6    2.62    0.30 
   5   2  -7    0.64    0.18 
  -5  -2   7    1.12    0.21 
  -5  -2   7    1.10    0.27 
   5   2  -8    0.97    0.26 
   5   2  -9    0.27    0.16 
   5   2 -10    0.25    0.21 
  -5  -1 -14    0.09    0.15 
  -5  -1 -13    0.54    0.20 
  -5  -1 -13    0.72    0.24 
  -5  -1 -12    3.70    0.44 
  -5  -1 -12    3.91    0.49 
  -5  -1 -11    1.97    0.34 
  -5  -1 -11    2.22    0.32 
  -5  -1 -10   -0.06    0.14 
  -5  -1 -10    0.05    0.11 
  -5  -1  -9    0.35    0.17 
  -5  -1  -9   -0.02    0.13 
  -5  -1  -8    1.78    0.29 
  -5  -1  -8    2.65    0.33 
  -5  -1  -7   14.24    0.69 
  -5  -1  -7   14.19    0.72 
  -5  -1  -6    0.05    0.10 
  -5  -1  -5    7.20    0.47 
  -5  -1  -4    1.85    0.24 
  -5  -1  -3    8.68    0.48 
  -5  -1  -2   18.39    0.67 
  -5  -1  -1    0.37    0.12 
  -5  -1   0    1.07    0.15 
   5   1   0    1.04    0.19 
  -5  -1   0    0.88    0.16 
  -5  -1   1   48.64    1.05 
   5   1  -1   49.84    1.18 
   5   1  -1   50.36    1.06 
  -5  -1   1   51.22    1.05 
  -5  -1   2    6.39    0.38 
   5   1  -2    6.69    0.46 
  -5  -1   3    0.71    0.18 
   5   1  -3    0.88    0.18 
  -5  -1   3    0.64    0.14 
   5   1  -3    0.55    0.15 
  -5  -1   4    2.70    0.32 
  -5  -1   4    2.20    0.23 
   5   1  -4    2.76    0.31 
   5   1  -4    2.45    0.31 
  -5  -1   5    4.91    0.45 
  -5  -1   5    5.37    0.37 
   5   1  -5    5.74    0.45 
   5   1  -5    5.43    0.48 
  -5  -1   6    4.40    0.35 
   5   1  -6    5.00    0.43 
   5   1  -6    4.52    0.48 
  -5  -1   6    5.06    0.47 
  -5  -1   7    0.70    0.17 
   5   1  -7    0.63    0.22 
   5   1  -7    0.55    0.17 
   5   1  -8    0.34    0.20 
   5   1  -9    0.02    0.18 
   5   1 -10    0.41    0.22 
  -5   0 -13    2.67    0.38 
  -5   0 -13    2.17    0.38 
  -5   0 -12    1.06    0.24 
  -5   0 -12    1.22    0.28 
  -5   0 -11    0.71    0.20 
  -5   0 -11    0.72    0.21 
  -5   0 -10    2.92    0.37 
  -5   0 -10    2.79    0.37 
  -5   0  -9    0.95    0.23 
  -5   0  -8    5.21    0.46 
  -5   0  -7    3.58    0.36 
  -5   0  -6    2.20    0.29 
  -5   0  -5   -0.04    0.11 
  -5   0  -4    3.49    0.32 
  -5   0  -3    8.02    0.46 
   5   0   2    4.76    0.39 
  -5   0  -2    4.08    0.31 
   5   0   1   12.42    0.60 
  -5   0  -1   12.49    0.53 
   5   0   1   13.78    0.55 
  -5   0   0   51.22    1.04 
   5   0   0   50.97    1.24 
  -5   0   0   51.91    1.03 
   5   0   0   52.85    1.04 
  -5   0   1    1.89    0.20 
   5   0  -1    1.69    0.19 
   5   0  -1    2.16    0.27 
  -5   0   2   10.12    0.44 
   5   0  -2   10.42    0.58 
   5   0  -2   10.51    0.45 
  -5   0   3    9.28    0.51 
  -5   0   3    8.75    0.41 
   5   0  -3    8.83    0.55 
   5   0  -3    9.60    0.43 
   5   0  -3    9.75    0.57 
   5   0  -4    4.03    0.41 
   5   0  -4    3.82    0.38 
   5   0  -4    3.59    0.26 
  -5   0   4    3.79    0.27 
  -5   0   4    3.78    0.35 
   5   0  -5    7.87    0.59 
  -5   0   5    8.09    0.40 
   5   0  -5    8.11    0.55 
  -5   0   5    7.40    0.51 
   5   0  -6    0.08    0.14 
  -5   0   6    0.08    0.11 
  -5   0   6    0.15    0.08 
   5   0  -6    0.32    0.15 
   5   0  -7    0.08    0.12 
   5   0  -7    0.09    0.15 
   5   0  -8    1.43    0.27 
   5   0  -8    0.80    0.27 
   5   0  -9   -0.12    0.18 
  -5   1 -13    0.16    0.18 
   5  -1  12    0.79    0.27 
  -5   1 -12    0.29    0.18 
  -5   1 -11    0.25    0.14 
   5  -1  11    0.27    0.20 
   5  -1  10    4.28    0.48 
  -5   1 -10    3.86    0.45 
   5  -1   9    1.03    0.23 
  -5   1  -9    0.67    0.20 
   5  -1   8    0.14    0.13 
  -5   1  -8    0.11    0.16 
   5  -1   7    1.68    0.27 
  -5   1  -7    2.40    0.31 
  -5   1  -6    4.52    0.39 
   5  -1   6    4.16    0.39 
  -5   1  -5    0.04    0.11 
  -5   1  -4   -0.04    0.11 
  -5   1  -3   -0.03    0.05 
   5  -1   3    0.03    0.11 
  -5   1  -3    0.08    0.11 
  -5   1  -2   60.91    1.07 
   5  -1   2   61.45    1.35 
  -5   1  -2   59.78    1.17 
  -5   1  -1   25.73    0.65 
   5  -1   1   25.79    0.90 
  -5   1  -1   25.24    0.74 
   5  -1   0    7.97    0.51 
  -5   1   0    8.61    0.41 
   5  -1  -1   22.31    0.85 
  -5   1   1   21.84    0.63 
   5  -1  -1   21.42    0.64 
  -5   1   2    7.34    0.35 
   5  -1  -2    6.49    0.49 
   5  -1  -2    6.62    0.34 
  -5   1   3   20.60    0.57 
  -5   1   3   20.88    0.72 
   5  -1  -3   21.25    0.58 
   5  -1  -3   20.91    0.86 
  -5   1   4    2.96    0.29 
  -5   1   4    2.68    0.18 
   5  -1  -4    2.77    0.34 
   5  -1  -4    2.66    0.20 
  -5   1   5    2.28    0.17 
   5  -1  -5    2.58    0.33 
   5  -1  -5    1.78    0.31 
  -5   1   5    2.54    0.29 
   5  -1  -6    0.90    0.24 
  -5   1   6    0.90    0.21 
   5  -1  -6    1.04    0.26 
   5  -1  -7    0.41    0.18 
   5  -1  -7    0.03    0.11 
   5  -1  -8   -0.06    0.15 
   5  -1  -8    0.14    0.11 
   5  -1  -9    0.16    0.14 
   5  -2  14    0.08    0.19 
  -5   2 -14   -0.14    0.17 
  -5   2 -13    0.14    0.12 
   5  -2  13    0.15    0.23 
   5  -2  12    0.34    0.24 
   5  -2  11    0.01    0.13 
   5  -2  10    0.13    0.14 
   5  -2   9    1.34    0.28 
   5  -2   8    0.71    0.22 
   5  -2   7    1.18    0.24 
   5  -2   6    0.58    0.18 
   5  -2   5    0.08    0.11 
   5  -2   4    5.50    0.39 
   5  -2   4    4.54    0.39 
  -5   2  -3   18.55    0.64 
   5  -2   3   17.81    0.76 
  -5   2  -3   18.64    0.72 
  -5   2  -2    0.67    0.12 
   5  -2   2    0.74    0.20 
  -5   2  -2    0.99    0.17 
  -5   2  -1    4.36    0.26 
   5  -2   1    4.10    0.38 
  -5   2  -1    4.38    0.31 
  -5   2   0   16.72    0.45 
   5  -2   0   16.68    0.76 
  -5   2   0   16.63    0.57 
  -5   2   1    0.43    0.10 
  -5   2   1    0.25    0.06 
   5  -2  -1    0.26    0.18 
  -5   2   2   10.90    0.27 
  -5   2   2   11.25    0.41 
   5  -2  -2   11.03    0.63 
  -5   2   3   14.93    0.57 
  -5   2   3   15.40    0.44 
   5  -2  -3   14.45    0.75 
  -5   2   4    4.98    0.35 
   5  -2  -4    5.14    0.46 
  -5   2   5    1.03    0.17 
   5  -2  -5    0.80    0.20 
   5  -2  -6    1.17    0.29 
   5  -2  -6    0.79    0.21 
   5  -2  -7   -0.75    0.22 
   5  -2  -7    0.40    0.21 
   5  -2  -8    0.26    0.17 
   5  -2  -8    1.25    0.32 
   5  -2  -9    0.13    0.24 
   5  -2  -9   -0.12    0.17 
  -5   3 -14   -0.16    0.18 
   5  -3  13   -0.21    0.17 
   5  -3  12    0.00    0.14 
   5  -3  11    1.28    0.32 
   5  -3  10    0.01    0.12 
   5  -3   9    0.19    0.15 
   5  -3   8   -0.09    0.16 
   5  -3   7    6.31    0.52 
   5  -3   6   -0.01    0.12 
   5  -3   5   26.08    0.90 
   5  -3   4    8.53    0.49 
   5  -3   4    9.65    0.56 
   5  -3   3    4.89    0.34 
   5  -3   3    5.61    0.44 
   5  -3   2    0.94    0.15 
  -5   3  -2    0.94    0.14 
   5  -3   2    0.87    0.22 
  -5   3  -1    0.83    0.13 
   5  -3   1    0.82    0.22 
  -5   3  -1    0.56    0.13 
  -5   3   0    0.37    0.07 
  -5   3   0    0.24    0.09 
   5  -3   0    0.33    0.14 
  -5   3   1    3.83    0.16 
   5  -3  -1    4.15    0.41 
  -5   3   1    3.60    0.25 
   5  -3  -2   12.33    0.70 
  -5   3   2   12.46    0.42 
  -5   3   3    1.82    0.19 
  -5   3   3    2.11    0.15 
   5  -3  -3    1.59    0.28 
   5  -3  -4    8.41    0.62 
  -5   3   4    9.31    0.43 
   5  -3  -5   -0.15    0.18 
   5  -3  -6    1.89    0.31 
   5  -3  -7    1.87    0.35 
   5  -3  -8    0.17    0.18 
   5  -3  -9    0.01    0.16 
   5  -4  13   -0.10    0.17 
   5  -4  12    0.19    0.14 
   5  -4  11    0.11    0.19 
   5  -4  10    2.63    0.42 
   5  -4   9   -0.02    0.15 
   5  -4   8    0.60    0.20 
   5  -4   7    0.70    0.21 
   5  -4   6    5.57    0.47 
   5  -4   5    0.39    0.16 
   5  -4   5    0.63    0.17 
   5  -4   4    1.77    0.25 
   5  -4   4    1.58    0.27 
   5  -4   3   -0.08    0.11 
   5  -4   3   -0.01    0.12 
  -5   4  -2    1.62    0.19 
   5  -4   2    1.48    0.19 
   5  -4   2    1.44    0.26 
  -5   4  -1    1.26    0.15 
   5  -4   1    1.26    0.16 
   5  -4   1    1.38    0.27 
  -5   4   0    5.59    0.26 
   5  -4   0    5.70    0.47 
  -5   4   0    5.64    0.36 
  -5   4   1    0.16    0.08 
   5  -4  -1   -0.16    0.18 
   5  -4  -2    4.24    0.42 
  -5   4   2    4.31    0.25 
  -5   4   3    0.65    0.11 
   5  -4  -3    0.56    0.17 
  -5   4   3    0.62    0.08 
   5  -4  -4    0.23    0.15 
  -5   4   4    0.32    0.08 
   5  -4  -5    6.13    0.57 
   5  -4  -6    0.10    0.20 
   5  -4  -7    0.92    0.25 
   5  -4  -8    0.89    0.27 
   5  -4  -9   -0.18    0.17 
   5  -4 -10    0.49    0.22 
   5  -5  12    0.66    0.25 
   5  -5  11    0.47    0.25 
   5  -5  10    0.18    0.17 
   5  -5   9    2.19    0.37 
   5  -5   8    0.92    0.25 
   5  -5   7    1.08    0.26 
   5  -5   6    6.23    0.52 
   5  -5   5    2.31    0.31 
   5  -5   5    2.40    0.31 
   5  -5   4    2.98    0.32 
   5  -5   4    3.10    0.35 
   5  -5   3    0.58    0.15 
   5  -5   3    1.30    0.26 
   5  -5   2    2.89    0.27 
   5  -5   2    3.14    0.37 
  -5   5  -1   10.76    0.45 
   5  -5   1   10.10    0.44 
   5  -5   1    9.87    0.64 
   5  -5   0    0.04    0.05 
   5  -5   0    0.05    0.15 
   5  -5  -1    5.60    0.50 
  -5   5   1    6.04    0.36 
  -5   5   2    2.31    0.15 
  -5   5   2    2.31    0.20 
   5  -5  -2    2.37    0.36 
   5  -5  -3   25.52    1.12 
   5  -5  -4    1.59    0.33 
   5  -5  -5    9.67    0.75 
   5  -5  -6    3.14    0.45 
   5  -5  -7    0.31    0.21 
   5  -5  -8    1.85    0.40 
   5  -5  -9    0.43    0.24 
   5  -6  12    0.23    0.18 
   5  -6  11   -0.06    0.21 
   5  -6  10    0.20    0.18 
   5  -6   9    2.55    0.41 
   5  -6   8    1.40    0.30 
   5  -6   7   16.38    0.89 
   5  -6   6    0.12    0.14 
   5  -6   6   -0.03    0.15 
   5  -6   5    5.26    0.46 
   5  -6   5    5.49    0.47 
   5  -6   4    0.48    0.18 
   5  -6   4    0.50    0.23 
   5  -6   3    0.53    0.14 
   5  -6   3    0.88    0.27 
   5  -6   2    0.89    0.17 
   5  -6   2    0.65    0.19 
   5  -6   1    3.86    0.29 
   5  -6   1    3.50    0.40 
   5  -6   0    7.32    0.35 
   5  -6   0    6.19    0.54 
   5  -6  -1    6.83    0.59 
   5  -6  -2    7.15    0.62 
  -5   6   2    7.06    0.37 
   5  -6  -3    6.48    0.60 
   5  -6  -4    5.78    0.59 
   5  -6  -5    0.02    0.12 
   5  -6  -6    2.44    0.43 
   5  -6  -7    0.28    0.22 
   5  -6  -8    0.01    0.18 
   5  -7  11    0.15    0.23 
   5  -7  10    0.25    0.15 
   5  -7   9    1.29    0.31 
   5  -7   8    1.50    0.32 
   5  -7   7    0.35    0.20 
   5  -7   6    1.42    0.28 
   5  -7   6    1.37    0.25 
   5  -7   5    4.76    0.46 
   5  -7   5    4.30    0.44 
   5  -7   4    1.61    0.26 
   5  -7   4    2.67    0.38 
   5  -7   3    6.56    0.47 
   5  -7   3    6.70    0.56 
   5  -7   2   15.57    0.67 
   5  -7   2   14.93    0.82 
   5  -7   1    0.04    0.08 
   5  -7   1   -1.19    0.28 
   5  -7   0   11.42    0.47 
   5  -7   0   10.42    0.73 
   5  -7  -1    0.15    0.21 
   5  -7  -2    3.78    0.47 
   5  -7  -3    1.62    0.33 
   5  -7  -4    1.34    0.33 
   5  -7  -5   -0.15    0.18 
   5  -7  -6    0.22    0.20 
   5  -7  -7    0.09    0.21 
   5  -8  10    0.02    0.17 
   5  -8   9    0.49    0.23 
   5  -8   8    3.35    0.48 
   5  -8   7    1.48    0.32 
   5  -8   6    3.29    0.43 
   5  -8   6    2.89    0.36 
   5  -8   5    0.27    0.18 
   5  -8   5    0.65    0.23 
   5  -8   4    9.95    0.64 
   5  -8   4    8.90    0.68 
   5  -8   3    0.16    0.17 
   5  -8   3    0.04    0.13 
   5  -8   2    3.57    0.34 
   5  -8   2    3.11    0.40 
   5  -8   1    0.29    0.11 
   5  -8   1   -0.02    0.23 
   5  -8   0    1.57    0.28 
   5  -8  -1    0.12    0.15 
   5  -8  -2    2.81    0.42 
   5  -8  -3    0.09    0.18 
   5  -8  -4    1.23    0.32 
   5  -8  -5    0.36    0.20 
   5  -8  -6    0.10    0.22 
   5  -9   9    0.06    0.16 
   5  -9   8    0.86    0.28 
   5  -9   7    0.89    0.27 
   5  -9   6    1.21    0.29 
   5  -9   6    0.88    0.24 
   5  -9   5    0.63    0.23 
   5  -9   5    0.35    0.21 
   5  -9   4    0.34    0.15 
   5  -9   4   -0.06    0.15 
   5  -9   3    0.28    0.15 
   5  -9   3    0.10    0.17 
   5  -9   2   -0.14    0.18 
   5  -9   2    0.14    0.12 
   5  -9   1    0.42    0.18 
   5  -9   0    1.41    0.28 
   5  -9  -1    6.28    0.64 
   5  -9  -2    0.42    0.22 
   5  -9  -3    0.84    0.29 
   5  -9  -4    0.23    0.23 
   5 -10   8    0.17    0.14 
   5 -10   7    0.14    0.17 
   5 -10   6   -0.06    0.14 
   5 -10   5    0.51    0.22 
   5 -10   5   -0.11    0.15 
   5 -10   4    0.05    0.12 
   5 -10   4    0.35    0.21 
   5 -10   3    0.76    0.21 
   5 -10   3    0.84    0.28 
   5 -10   2    0.49    0.20 
   5 -10   1    1.27    0.29 
   5 -10   0   -0.49    0.27 
   5 -10  -1    0.06    0.15 
   5 -10  -2    0.00    0.17 
   5 -10  -3    0.58    0.28 
   5 -11   7    0.78    0.30 
   5 -11   6    0.32    0.20 
   5 -11   5    2.28    0.40 
   5 -11   4    0.38    0.19 
   5 -11   4    1.07    0.32 
   5 -11   3    1.03    0.31 
   5 -11   2    0.17    0.18 
   5 -11   1   -0.59    0.32 
   5 -11   0   -1.13    0.33 
   5 -11  -1   -1.09    0.32 
   5 -12   6    0.51    0.22 
   5 -12   5    0.06    0.13 
   5 -12   3    0.24    0.25 
   5 -12   2   -0.20    0.23 
   5 -12   1   -0.48    0.30 
   5 -12   0   -0.61    0.32 
  -6 -13  -4   -0.01    0.17 
  -6 -13  -3    0.17    0.21 
  -6 -13   0    0.03    0.13 
  -6 -12  -7    0.15    0.17 
  -6 -12  -2    0.59    0.23 
  -6 -12  -1    0.31    0.18 
  -6 -12   0   -0.01    0.13 
  -6 -12   1    0.08    0.14 
  -6 -11  -8    0.18    0.16 
  -6 -11  -7    0.07    0.14 
  -6 -11  -7   -0.11    0.14 
  -6 -11  -6    0.52    0.22 
  -6 -11  -6    0.65    0.23 
  -6 -11  -5    0.64    0.22 
  -6 -11  -4    1.62    0.31 
  -6 -11  -3    0.68    0.21 
  -6 -11  -2   -0.17    0.18 
  -6 -11  -1   -0.05    0.15 
  -6 -11   0    0.54    0.25 
  -6 -11   1    0.21    0.16 
  -6 -11   2    0.46    0.25 
  -6 -11   3    0.41    0.23 
  -6 -10  -9    0.77    0.30 
  -6 -10  -8    0.36    0.22 
  -6 -10  -8    0.08    0.13 
  -6 -10  -7    1.20    0.31 
  -6 -10  -7    1.11    0.28 
  -6 -10  -6    0.14    0.17 
  -6 -10  -6   -0.01    0.12 
  -6 -10  -5    0.60    0.21 
  -6 -10  -5    0.18    0.21 
  -6 -10  -4    0.23    0.18 
  -6 -10  -4   -0.10    0.15 
  -6 -10  -3    0.32    0.17 
  -6 -10  -3    0.39    0.22 
  -6 -10  -2    0.13    0.14 
  -6 -10  -1   -0.11    0.16 
  -6 -10   0    2.59    0.41 
  -6 -10   1    0.62    0.23 
  -6 -10   2    0.85    0.31 
  -6 -10   3    0.55    0.26 
  -6 -10   4    1.30    0.34 
  -6 -10   4    1.68    0.37 
  -6  -9 -10   -0.11    0.16 
  -6  -9  -9    0.26    0.15 
  -6  -9  -8   -0.16    0.19 
  -6  -9  -8    0.16    0.14 
  -6  -9  -7    0.31    0.17 
  -6  -9  -7    0.10    0.14 
  -6  -9  -6    0.24    0.15 
  -6  -9  -6    0.12    0.15 
  -6  -9  -5    0.24    0.18 
  -6  -9  -5    0.09    0.15 
  -6  -9  -4    0.46    0.21 
  -6  -9  -4   -0.19    0.16 
  -6  -9  -3    0.43    0.22 
  -6  -9  -2    3.84    0.45 
  -6  -9  -2    4.10    0.52 
  -6  -9  -1    0.18    0.15 
  -6  -9  -1   -0.16    0.19 
  -6  -9   0    1.07    0.28 
  -6  -9   1    1.39    0.31 
  -6  -9   2    1.39    0.34 
  -6  -9   3    0.07    0.13 
  -6  -9   4    0.35    0.24 
  -6  -9   5    0.27    0.19 
  -6  -9   5    0.05    0.21 
  -6  -8 -10    0.86    0.29 
  -6  -8  -9    0.04    0.17 
  -6  -8  -9    0.02    0.10 
  -6  -8  -8    0.43    0.20 
  -6  -8  -8    1.02    0.26 
  -6  -8  -7    0.14    0.17 
  -6  -8  -7    0.15    0.18 
  -6  -8  -6    0.34    0.15 
  -6  -8  -6    0.18    0.14 
  -6  -8  -5    0.06    0.16 
  -6  -8  -5    0.02    0.12 
  -6  -8  -4    5.64    0.54 
  -6  -8  -4    6.15    0.51 
  -6  -8  -3    0.67    0.24 
  -6  -8  -2    1.71    0.31 
  -6  -8  -1    6.49    0.60 
  -6  -8   0    0.01    0.14 
  -6  -8   0    0.02    0.18 
  -6  -8   1    0.12    0.18 
  -6  -8   2    1.08    0.28 
  -6  -8   3    2.26    0.38 
  -6  -8   4    0.34    0.23 
  -6  -8   5    0.16    0.17 
  -6  -8   5    0.36    0.20 
  -6  -8   6    0.14    0.18 
  -6  -8   6    0.26    0.21 
  -6  -8   7    0.11    0.19 
  -6  -7 -11    0.03    0.13 
  -6  -7 -10    0.49    0.24 
  -6  -7 -10    0.47    0.18 
  -6  -7  -9    0.08    0.13 
  -6  -7  -9    0.10    0.13 
  -6  -7  -8    0.01    0.16 
  -6  -7  -8    0.25    0.16 
  -6  -7  -7    1.95    0.33 
  -6  -7  -7    1.72    0.30 
  -6  -7  -6    0.40    0.18 
  -6  -7  -6    0.34    0.17 
  -6  -7  -5    3.77    0.43 
  -6  -7  -5    3.88    0.42 
  -6  -7  -4    0.29    0.19 
  -6  -7  -4    0.26    0.16 
  -6  -7  -3    7.44    0.60 
  -6  -7  -2    1.06    0.25 
  -6  -7  -1    4.34    0.49 
  -6  -7   0    2.93    0.39 
  -6  -7   0    3.56    0.44 
  -6  -7   1    3.64    0.45 
  -6  -7   1    3.50    0.45 
  -6  -7   2    0.03    0.16 
  -6  -7   3    0.25    0.18 
  -6  -7   4    0.05    0.19 
  -6  -7   5   -0.10    0.16 
  -6  -7   5    0.24    0.18 
  -6  -7   6    0.46    0.24 
  -6  -7   6    0.41    0.20 
  -6  -7   7    0.19    0.18 
  -6  -7   7    0.03    0.16 
  -6  -7   8    0.86    0.30 
  -6  -6 -12    0.26    0.21 
  -6  -6 -11   -0.02    0.14 
  -6  -6 -10   -0.12    0.15 
  -6  -6 -10    0.00    0.10 
  -6  -6  -9    1.19    0.27 
  -6  -6  -9    1.63    0.24 
  -6  -6  -9    1.46    0.27 
  -6  -6  -8    0.53    0.20 
  -6  -6  -8    0.32    0.11 
  -6  -6  -8    0.26    0.13 
  -6  -6  -7    0.83    0.24 
  -6  -6  -7    0.71    0.21 
  -6  -6  -7    1.01    0.15 
  -6  -6  -6    0.00    0.14 
  -6  -6  -6   -0.07    0.14 
  -6  -6  -6    0.09    0.06 
  -6  -6  -5    0.55    0.20 
  -6  -6  -5    0.62    0.19 
  -6  -6  -4    0.71    0.18 
  -6  -6  -3    0.36    0.16 
  -6  -6  -2    5.07    0.48 
  -6  -6  -1    1.10    0.26 
  -6  -6   0    0.29    0.16 
  -6  -6   1    0.18    0.17 
  -6  -6   1   -0.02    0.16 
  -6  -6   2    4.87    0.50 
  -6  -6   2    4.96    0.50 
   6   6  -2    4.64    0.30 
   6   6  -3    0.40    0.12 
  -6  -6   3    0.73    0.24 
  -6  -6   4   -0.25    0.19 
   6   6  -4   -0.04    0.09 
  -6  -6   5    0.26    0.17 
  -6  -6   5   -0.14    0.14 
   6   6  -5    0.08    0.11 
  -6  -6   6    0.81    0.26 
  -6  -6   6    1.00    0.27 
   6   6  -6    1.15    0.24 
  -6  -6   7   -0.10    0.17 
  -6  -6   7   -0.09    0.15 
   6   6  -7   -0.03    0.11 
  -6  -6   8    0.44    0.23 
  -6  -5 -13    0.34    0.18 
  -6  -5 -12    0.50    0.19 
  -6  -5 -12    0.94    0.30 
  -6  -5 -11    0.39    0.16 
  -6  -5 -11    0.61    0.23 
  -6  -5 -11    0.66    0.20 
  -6  -5 -10    0.41    0.16 
  -6  -5 -10    0.30    0.16 
  -6  -5 -10    0.31    0.15 
  -6  -5  -9    0.28    0.16 
  -6  -5  -9    0.65    0.23 
  -6  -5  -8    1.40    0.27 
  -6  -5  -8    1.38    0.26 
  -6  -5  -7    0.54    0.18 
  -6  -5  -7    0.49    0.18 
  -6  -5  -6   -0.04    0.14 
  -6  -5  -6    0.09    0.06 
  -6  -5  -6    0.00    0.12 
  -6  -5  -5    0.05    0.04 
  -6  -5  -5    0.07    0.15 
  -6  -5  -5    0.07    0.13 
  -6  -5  -4    0.50    0.18 
  -6  -5  -3    0.79    0.20 
  -6  -5  -2    0.39    0.19 
  -6  -5  -1    8.08    0.58 
  -6  -5   0   13.50    0.74 
   6   5  -1    0.56    0.13 
  -6  -5   1    0.75    0.22 
   6   5  -2    1.35    0.18 
  -6  -5   2    1.31    0.27 
   6   5  -2    1.19    0.16 
  -6  -5   2    1.69    0.29 
  -6  -5   3    3.23    0.41 
   6   5  -3    2.55    0.27 
   6   5  -4    0.19    0.15 
  -6  -5   4    0.13    0.11 
  -6  -5   5    1.68    0.32 
  -6  -5   5    1.32    0.31 
   6   5  -5    1.64    0.27 
  -6  -5   6   -0.04    0.16 
  -6  -5   6    0.07    0.15 
   6   5  -6    0.13    0.14 
  -6  -5   7   -0.19    0.19 
  -6  -5   7    0.11    0.14 
   6   5  -7    0.20    0.14 
  -6  -5   8   -0.34    0.21 
   6   5  -8    0.09    0.13 
   6   5  -9    0.34    0.20 
  -6  -4 -14    0.61    0.26 
  -6  -4 -13    0.01    0.16 
  -6  -4 -12    0.03    0.10 
  -6  -4 -12    0.19    0.19 
  -6  -4 -11    0.20    0.16 
  -6  -4 -11    0.10    0.10 
  -6  -4 -10    0.27    0.11 
  -6  -4 -10    0.41    0.18 
  -6  -4  -9    2.44    0.34 
  -6  -4  -9    2.29    0.36 
  -6  -4  -8   -0.06    0.13 
  -6  -4  -8    0.09    0.14 
  -6  -4  -7    7.55    0.55 
  -6  -4  -7    7.31    0.58 
  -6  -4  -6    9.51    0.61 
  -6  -4  -6   10.03    0.64 
  -6  -4  -5    2.40    0.31 
  -6  -4  -4    0.92    0.21 
  -6  -4  -3    7.64    0.53 
  -6  -4  -2    7.93    0.54 
  -6  -4  -1    0.16    0.13 
  -6  -4   0    1.41    0.24 
  -6  -4   1    0.64    0.19 
  -6  -4   2    0.64    0.20 
  -6  -4   2    0.64    0.19 
   6   4  -2    0.57    0.14 
  -6  -4   3    6.04    0.54 
  -6  -4   3    5.82    0.49 
   6   4  -3    5.39    0.40 
  -6  -4   4    0.22    0.17 
   6   4  -4    0.31    0.14 
  -6  -4   5   -0.02    0.12 
   6   4  -5    0.21    0.15 
  -6  -4   5    0.15    0.15 
  -6  -4   6    0.12    0.15 
   6   4  -6    0.04    0.12 
  -6  -4   6    0.27    0.14 
  -6  -4   7    0.04    0.17 
   6   4  -7   -0.09    0.11 
  -6  -4   7   -0.02    0.13 
   6   4  -8    0.24    0.17 
   6   4  -9    0.28    0.21 
  -6  -3 -13    0.15    0.18 
  -6  -3 -12    0.26    0.13 
  -6  -3 -12    0.23    0.19 
  -6  -3 -11    2.53    0.36 
  -6  -3 -11    1.63    0.34 
  -6  -3 -10    0.17    0.12 
  -6  -3 -10    0.48    0.22 
  -6  -3  -9    1.34    0.26 
  -6  -3  -9    0.78    0.23 
  -6  -3  -8    0.10    0.11 
  -6  -3  -8   -0.04    0.13 
  -6  -3  -7    0.04    0.12 
  -6  -3  -7    0.02    0.11 
  -6  -3  -6   10.13    0.62 
  -6  -3  -5   16.88    0.77 
  -6  -3  -4    8.22    0.54 
  -6  -3  -3   15.96    0.73 
  -6  -3  -2    0.17    0.06 
  -6  -3  -2    0.10    0.14 
  -6  -3  -1    0.63    0.10 
  -6  -3  -1    0.67    0.17 
  -6  -3   0    1.13    0.21 
  -6  -3   1    5.69    0.44 
   6   3  -2    0.50    0.13 
  -6  -3   2    0.22    0.13 
  -6  -3   2    0.39    0.16 
  -6  -3   3    0.11    0.13 
   6   3  -3    0.02    0.10 
  -6  -3   3    0.03    0.12 
  -6  -3   4    0.44    0.19 
   6   3  -4    0.51    0.17 
  -6  -3   5    1.51    0.30 
  -6  -3   5    1.46    0.26 
   6   3  -5    1.41    0.26 
  -6  -3   6    0.19    0.13 
  -6  -3   6    0.22    0.13 
   6   3  -6    0.36    0.17 
  -6  -3   7   -0.06    0.16 
  -6  -3   7    0.16    0.16 
   6   3  -7   -0.08    0.15 
   6   3  -8    1.06    0.30 
   6   3  -9    0.24    0.20 
  -6  -2 -14    0.39    0.17 
  -6  -2 -13    2.11    0.34 
  -6  -2 -13    2.77    0.46 
  -6  -2 -12    0.00    0.12 
  -6  -2 -12    0.09    0.15 
  -6  -2 -11    2.50    0.36 
  -6  -2 -11    3.32    0.46 
  -6  -2 -10    0.40    0.17 
  -6  -2 -10    0.47    0.20 
  -6  -2  -9    0.70    0.20 
  -6  -2  -9    0.74    0.22 
  -6  -2  -8    0.34    0.16 
  -6  -2  -7    0.18    0.13 
  -6  -2  -6    7.98    0.54 
  -6  -2  -5   29.78    1.00 
  -6  -2  -4    1.20    0.22 
  -6  -2  -3    8.13    0.51 
  -6  -2  -2   24.80    0.87 
  -6  -2  -1    8.04    0.49 
  -6  -2  -1    7.60    0.35 
  -6  -2   0    0.70    0.12 
  -6  -2   0    0.67    0.17 
  -6  -2   1    2.41    0.28 
   6   2  -2    1.28    0.23 
  -6  -2   2    1.74    0.24 
  -6  -2   3    0.56    0.16 
   6   2  -3    0.82    0.19 
  -6  -2   3    0.95    0.20 
   6   2  -3    1.10    0.20 
   6   2  -4   -0.02    0.11 
   6   2  -4   -0.04    0.12 
  -6  -2   4   -0.12    0.14 
   6   2  -5    0.56    0.19 
  -6  -2   5    0.43    0.18 
  -6  -2   5    0.41    0.14 
   6   2  -5    0.48    0.15 
  -6  -2   6    0.36    0.18 
  -6  -2   6    0.07    0.09 
   6   2  -6    0.41    0.16 
   6   2  -6   -0.01    0.12 
  -6  -2   7   -0.15    0.15 
   6   2  -7    0.27    0.18 
   6   2  -8    1.24    0.30 
   6   2  -9    0.67    0.28 
  -6  -1 -13    1.13    0.27 
  -6  -1 -12    0.47    0.18 
  -6  -1 -11   -0.13    0.15 
  -6  -1 -10    0.07    0.11 
  -6  -1  -9    0.32    0.14 
  -6  -1  -8    7.10    0.55 
  -6  -1  -7    0.54    0.18 
  -6  -1  -6    2.50    0.32 
  -6  -1  -5    2.77    0.32 
  -6  -1  -4    7.96    0.51 
  -6  -1  -3    0.81    0.19 
  -6  -1  -2    0.39    0.12 
  -6  -1  -1    0.25    0.11 
  -6  -1  -1    0.20    0.09 
  -6  -1   0    0.37    0.11 
   6   1   0    0.23    0.13 
  -6  -1   0    0.30    0.12 
   6   1  -1    1.28    0.22 
  -6  -1   1    1.26    0.19 
  -6  -1   2    4.39    0.35 
   6   1  -2    4.26    0.40 
  -6  -1   3    1.02    0.22 
   6   1  -3    1.27    0.24 
  -6  -1   3    1.25    0.19 
   6   1  -4    1.25    0.25 
  -6  -1   4    1.11    0.24 
   6   1  -4    1.42    0.25 
  -6  -1   5    0.37    0.18 
  -6  -1   5    0.24    0.10 
   6   1  -5    0.28    0.14 
   6   1  -5    0.36    0.15 
  -6  -1   6    0.20    0.13 
   6   1  -6    0.27    0.20 
   6   1  -6    0.02    0.12 
   6   1  -7    0.64    0.21 
  -6  -1   7    0.96    0.24 
   6   1  -8    0.24    0.19 
   6   1  -9    0.03    0.17 
  -6   0 -14    0.54    0.21 
  -6   0 -13   -0.02    0.11 
  -6   0 -12    0.10    0.15 
  -6   0 -11    0.43    0.20 
  -6   0 -10    5.39    0.52 
  -6   0  -9    0.06    0.13 
  -6   0  -8    9.08    0.63 
  -6   0  -7    6.98    0.53 
  -6   0  -6    0.87    0.20 
  -6   0  -5    2.47    0.31 
  -6   0  -4    3.97    0.37 
  -6   0  -3    0.67    0.17 
   6   0   2    7.75    0.53 
  -6   0  -2    7.53    0.46 
   6   0   1    1.56    0.25 
  -6   0  -1    1.73    0.23 
  -6   0   0    0.18    0.11 
   6   0   0    0.21    0.14 
   6   0  -1    0.80    0.20 
  -6   0   1    1.04    0.17 
  -6   0   2    7.48    0.42 
   6   0  -2    7.33    0.53 
  -6   0   3    9.57    0.58 
  -6   0   3   10.01    0.48 
   6   0  -3   10.07    0.65 
  -6   0   4    1.10    0.21 
  -6   0   4    0.69    0.13 
  -6   0   4    0.91    0.15 
   6   0  -4    0.65    0.19 
  -6   0   5    5.17    0.45 
  -6   0   5    5.46    0.34 
   6   0  -5    4.88    0.50 
   6   0  -5    5.34    0.51 
  -6   0   6    0.09    0.11 
   6   0  -6    0.35    0.17 
   6   0  -6    0.19    0.16 
   6   0  -7    0.15    0.16 
   6   0  -7    0.41    0.17 
   6   0  -8    0.11    0.15 
   6   0  -9    0.59    0.27 
  -6   1 -14    0.29    0.21 
  -6   1 -13    0.19    0.17 
  -6   1 -12    0.06    0.14 
  -6   1 -11    0.00    0.14 
  -6   1 -10    0.92    0.25 
  -6   1  -9    1.74    0.32 
  -6   1  -8    0.38    0.17 
  -6   1  -7    1.15    0.25 
  -6   1  -6    0.94    0.22 
  -6   1  -5   14.27    0.71 
  -6   1  -4    4.42    0.38 
   6  -1   3    4.04    0.39 
  -6   1  -3    4.36    0.37 
  -6   1  -2   26.68    0.77 
   6  -1   2   26.50    0.98 
  -6   1  -2   25.61    0.85 
  -6   1  -1    6.78    0.37 
   6  -1   1    6.81    0.51 
  -6   1  -1    6.37    0.41 
  -6   1   0    1.44    0.20 
   6  -1   0    1.28    0.26 
   6  -1  -1   10.04    0.64 
  -6   1   1    9.50    0.46 
  -6   1   2    2.98    0.26 
   6  -1  -2    3.55    0.41 
   6  -1  -2    2.78    0.25 
  -6   1   3    6.89    0.46 
  -6   1   3    6.80    0.37 
   6  -1  -3    7.20    0.57 
   6  -1  -3    6.47    0.36 
  -6   1   4    1.68    0.15 
  -6   1   4    1.62    0.18 
   6  -1  -4    1.96    0.33 
  -6   1   4    1.88    0.26 
  -6   1   5    0.05    0.09 
   6  -1  -5    0.34    0.20 
  -6   1   6    1.40    0.24 
   6  -1  -6    1.73    0.33 
   6  -1  -7    0.48    0.22 
   6  -1  -7    0.01    0.17 
   6  -1  -8    0.34    0.17 
   6  -1  -8    0.10    0.19 
  -6   2 -14    0.06    0.16 
  -6   2 -13    0.34    0.20 
   6  -2  12   -0.26    0.20 
  -6   2 -12    0.05    0.13 
   6  -2  11    0.55    0.22 
  -6   2 -11    0.54    0.21 
   6  -2  10    0.09    0.14 
  -6   2 -10   -0.01    0.15 
   6  -2   9    0.51    0.22 
   6  -2   8    1.81    0.31 
   6  -2   7    0.75    0.20 
   6  -2   6    0.19    0.14 
  -6   2  -6    0.17    0.14 
  -6   2  -5    3.37    0.37 
   6  -2   4   36.94    1.16 
  -6   2  -4   35.95    1.10 
   6  -2   3   13.62    0.71 
  -6   2  -3   12.92    0.63 
  -6   2  -2    0.57    0.12 
  -6   2  -2    0.65    0.16 
   6  -2   2    0.56    0.21 
  -6   2  -1    0.24    0.08 
  -6   2  -1    0.07    0.08 
   6  -2   1    0.23    0.16 
  -6   2   0    0.52    0.10 
  -6   2   0    0.44    0.12 
   6  -2   0    0.62    0.22 
  -6   2   1    1.65    0.14 
  -6   2   1    1.61    0.19 
   6  -2  -1    1.88    0.33 
  -6   2   2    2.65    0.16 
  -6   2   2    2.77    0.24 
   6  -2  -2    2.84    0.37 
  -6   2   3    5.86    0.41 
  -6   2   3    5.32    0.17 
  -6   2   3    6.04    0.32 
   6  -2  -3    6.01    0.54 
  -6   2   4    8.76    0.50 
   6  -2  -4    9.89    0.70 
  -6   2   5    1.00    0.19 
   6  -2  -5    0.97    0.25 
   6  -2  -6    0.55    0.22 
   6  -2  -7    0.75    0.25 
   6  -2  -8   -0.19    0.15 
  -6   3 -14   -0.10    0.17 
   6  -3  13    0.40    0.23 
  -6   3 -13    0.09    0.16 
   6  -3  12    0.06    0.19 
   6  -3  11    0.58    0.24 
   6  -3  10    0.00    0.14 
   6  -3   9    0.08    0.16 
   6  -3   8    1.07    0.28 
   6  -3   7   -0.04    0.13 
   6  -3   6    8.93    0.59 
   6  -3   5    2.16    0.28 
   6  -3   4    0.43    0.14 
   6  -3   4    0.25    0.17 
   6  -3   3    1.87    0.30 
  -6   3  -3    2.12    0.29 
  -6   3  -2   22.41    0.70 
   6  -3   2   20.83    0.94 
  -6   3  -2   21.57    0.79 
  -6   3  -1    5.98    0.33 
   6  -3   1    5.44    0.51 
  -6   3  -1    5.77    0.40 
  -6   3   0    0.01    0.04 
  -6   3   0   -0.02    0.10 
   6  -3   0    0.21    0.20 
  -6   3   1   33.55    0.55 
   6  -3  -1   34.53    1.25 
  -6   3   1   33.97    0.85 
   6  -3  -2    8.11    0.63 
  -6   3   2    8.19    0.39 
  -6   3   3    1.37    0.19 
  -6   3   3    1.22    0.13 
   6  -3  -3    1.12    0.25 
  -6   3   4    0.78    0.14 
   6  -3  -4    0.63    0.23 
   6  -3  -5    3.01    0.42 
   6  -3  -6    0.16    0.17 
   6  -3  -7    1.05    0.27 
   6  -3  -8   -0.13    0.19 
   6  -4  12    1.00    0.33 
   6  -4  11   -0.04    0.14 
   6  -4  10    2.14    0.39 
   6  -4   9    2.62    0.38 
   6  -4   8    1.52    0.32 
   6  -4   7    4.73    0.48 
   6  -4   6    1.12    0.23 
   6  -4   5    0.63    0.18 
   6  -4   5    0.71    0.21 
   6  -4   4   27.25    0.92 
   6  -4   4   26.72    1.07 
   6  -4   3    0.89    0.18 
   6  -4   3    1.09    0.26 
   6  -4   2    0.29    0.20 
  -6   4  -2    0.33    0.13 
  -6   4  -1    3.24    0.25 
  -6   4  -1    2.90    0.30 
   6  -4   1    2.82    0.38 
  -6   4   0    4.97    0.25 
   6  -4   0    5.27    0.51 
  -6   4   0    5.08    0.36 
  -6   4   1    0.35    0.11 
   6  -4  -1    0.44    0.23 
  -6   4   2    1.84    0.19 
   6  -4  -2    1.83    0.34 
  -6   4   3   12.97    0.49 
   6  -4  -3   11.62    0.79 
   6  -4  -4    0.92    0.22 
   6  -4  -5    1.63    0.31 
   6  -4  -6   -0.02    0.18 
   6  -4  -7    2.30    0.40 
   6  -4  -8   -0.54    0.26 
   6  -4  -9    0.56    0.25 
   6  -5  12    0.49    0.23 
   6  -5  11    0.16    0.18 
   6  -5  10    0.32    0.17 
   6  -5   9    0.33    0.19 
   6  -5   8    0.90    0.23 
   6  -5   7    8.96    0.66 
   6  -5   6    6.19    0.53 
   6  -5   6    6.59    0.53 
   6  -5   5   13.42    0.72 
   6  -5   5   11.87    0.74 
   6  -5   4    0.34    0.14 
   6  -5   4    0.57    0.24 
   6  -5   3    1.33    0.21 
   6  -5   3    2.27    0.41 
   6  -5   2    0.05    0.08 
   6  -5   2    0.28    0.22 
  -6   5  -1    1.71    0.19 
   6  -5   1    1.95    0.33 
   6  -5   0    3.49    0.43 
  -6   5   0    3.52    0.32 
   6  -5  -1   19.79    1.00 
  -6   5   1   23.39    0.73 
  -6   5   2    1.59    0.17 
   6  -5  -2    1.19    0.28 
   6  -5  -3    3.79    0.47 
   6  -5  -4    0.48    0.18 
   6  -5  -5    0.23    0.18 
   6  -5  -6    0.35    0.18 
   6  -5  -7    0.83    0.26 
   6  -5  -8    0.26    0.18 
   6  -6  11    0.18    0.17 
   6  -6  10    0.51    0.26 
   6  -6   9    1.11    0.31 
   6  -6   8    0.24    0.17 
   6  -6   7    5.36    0.52 
   6  -6   6    3.75    0.43 
   6  -6   6    3.26    0.42 
   6  -6   5    0.86    0.21 
   6  -6   5    1.72    0.31 
   6  -6   4    1.17    0.23 
   6  -6   4    1.17    0.28 
   6  -6   3    0.19    0.11 
   6  -6   3    0.61    0.25 
   6  -6   2    0.73    0.15 
   6  -6   2    1.16    0.30 
   6  -6   1    2.86    0.25 
   6  -6   1    2.34    0.37 
  -6   6   0    0.03    0.08 
   6  -6   0   -0.06    0.20 
  -6   6   1    0.43    0.12 
   6  -6  -1    0.03    0.25 
   6  -6  -2   -0.55    0.22 
   6  -6  -3    1.12    0.25 
   6  -6  -4   -0.77    0.26 
   6  -6  -5   -0.33    0.28 
   6  -6  -6   -0.59    0.29 
   6  -6  -7   -0.25    0.25 
   6  -7  11    0.20    0.22 
   6  -7  10    0.93    0.30 
   6  -7   9    0.42    0.24 
   6  -7   8    0.12    0.17 
   6  -7   7    0.38    0.16 
   6  -7   6    0.29    0.18 
   6  -7   6    0.03    0.16 
   6  -7   5   -0.08    0.16 
   6  -7   5    0.09    0.19 
   6  -7   4    3.73    0.39 
   6  -7   4    3.71    0.47 
   6  -7   3    0.14    0.10 
   6  -7   3    0.24    0.24 
   6  -7   2    3.69    0.33 
   6  -7   2    3.59    0.46 
   6  -7   1    0.80    0.15 
   6  -7   1    0.34    0.17 
   6  -7   0    0.25    0.16 
  -6   7   1    0.20    0.09 
   6  -7  -1   -0.19    0.24 
   6  -7  -2   -0.49    0.28 
   6  -7  -3    0.58    0.22 
   6  -7  -4   -0.16    0.25 
   6  -7  -5   -0.56    0.25 
   6  -7  -6   -0.16    0.23 
   6  -8  10    0.32    0.20 
   6  -8   9    1.61    0.36 
   6  -8   8    0.17    0.18 
   6  -8   7    1.01    0.27 
   6  -8   7    1.02    0.26 
   6  -8   6    0.40    0.21 
   6  -8   6    0.23    0.19 
   6  -8   5    5.44    0.51 
   6  -8   5    5.37    0.54 
   6  -8   4    0.19    0.15 
   6  -8   4    1.01    0.31 
   6  -8   3    0.03    0.11 
   6  -8   3    0.33    0.22 
   6  -8   2    0.16    0.10 
   6  -8   2    0.30    0.21 
   6  -8   1   -0.13    0.15 
   6  -8   0    0.08    0.21 
   6  -8  -1   -0.25    0.22 
   6  -8  -2   -0.16    0.26 
   6  -8  -3    0.03    0.24 
   6  -8  -4    0.74    0.27 
   6  -8  -5   -0.66    0.29 
   6  -9   9    0.03    0.18 
   6  -9   8    0.21    0.18 
   6  -9   7    0.28    0.20 
   6  -9   6   -0.08    0.14 
   6  -9   6    0.00    0.15 
   6  -9   5    0.21    0.15 
   6  -9   5    0.19    0.21 
   6  -9   4    0.39    0.17 
   6  -9   4    0.42    0.24 
   6  -9   3    0.15    0.12 
   6  -9   3    0.17    0.23 
   6  -9   2    0.02    0.14 
   6  -9   1    0.24    0.20 
   6  -9   0   -0.21    0.27 
   6  -9  -1   -0.12    0.25 
   6  -9  -2    0.68    0.22 
   6  -9  -3   -1.37    0.38 
   6 -10   8   -0.04    0.14 
   6 -10   7    0.02    0.14 
   6 -10   6   -0.14    0.14 
   6 -10   5    0.13    0.14 
   6 -10   5    0.22    0.21 
   6 -10   4    0.09    0.12 
   6 -10   4    0.66    0.26 
   6 -10   3    0.31    0.25 
   6 -10   2    0.08    0.18 
   6 -10   1    0.28    0.21 
   6 -10   0    2.09    0.41 
   6 -10  -1   -0.22    0.28 
   6 -10  -2    1.18    0.31 
   6 -11   7    0.21    0.19 
   6 -11   6    0.13    0.13 
   6 -11   5   -0.05    0.13 
   6 -11   4    0.83    0.32 
   6 -11   3    0.55    0.30 
   6 -11   2    1.61    0.40 
   6 -11   1    1.01    0.30 
   6 -11   0    1.48    0.36 
   6 -12   3    1.00    0.34 
   6 -12   2    1.17    0.36 
  -7 -12  -3    0.26    0.19 
  -7 -12  -2    0.35    0.23 
  -7 -12  -1    0.42    0.21 
  -7 -12   0   -0.06    0.15 
  -7 -11  -8    0.46    0.22 
  -7 -11  -8    0.27    0.17 
  -7 -11  -7    0.98    0.31 
  -7 -11  -7    0.73    0.28 
  -7 -11  -6    0.97    0.31 
  -7 -11  -6    0.04    0.14 
  -7 -11  -5    0.33    0.20 
  -7 -11  -4   -0.36    0.20 
  -7 -11  -4    0.11    0.18 
  -7 -11  -3    0.25    0.17 
  -7 -11  -2    0.11    0.18 
  -7 -11  -1    0.27    0.17 
  -7 -11   0   -0.02    0.14 
  -7 -11   1    0.10    0.21 
  -7 -10  -9    1.09    0.33 
  -7 -10  -8    1.48    0.36 
  -7 -10  -8    1.31    0.31 
  -7 -10  -7    0.51    0.26 
  -7 -10  -7    0.45    0.22 
  -7 -10  -6    1.07    0.29 
  -7 -10  -6    0.28    0.17 
  -7 -10  -5    0.11    0.18 
  -7 -10  -4    0.18    0.20 
  -7 -10  -3    0.95    0.30 
  -7 -10  -2    0.39    0.21 
  -7 -10  -2    0.20    0.13 
  -7 -10  -1    0.24    0.19 
  -7 -10   0    0.78    0.26 
  -7 -10   1    0.03    0.17 
  -7 -10   2    0.31    0.24 
  -7 -10   3    0.03    0.19 
  -7  -9  -9    0.18    0.19 
  -7  -9  -9   -0.07    0.15 
  -7  -9  -8    0.58    0.25 
  -7  -9  -8    0.14    0.14 
  -7  -9  -7    0.60    0.25 
  -7  -9  -7   -0.11    0.14 
  -7  -9  -6    1.99    0.36 
  -7  -9  -6    1.27    0.30 
  -7  -9  -5    0.84    0.25 
  -7  -9  -4    0.54    0.24 
  -7  -9  -3    0.68    0.24 
  -7  -9  -2   -0.06    0.16 
  -7  -9  -1   -0.15    0.14 
  -7  -9  -1    0.09    0.15 
  -7  -9   0    0.24    0.17 
  -7  -9   1   -0.18    0.20 
  -7  -9   2    0.28    0.19 
  -7  -9   3    0.75    0.28 
  -7  -9   4   -0.24    0.21 
  -7  -8 -10    0.20    0.22 
  -7  -8 -10   -0.08    0.11 
  -7  -8  -9    0.04    0.15 
  -7  -8  -9   -0.18    0.15 
  -7  -8  -8    1.06    0.27 
  -7  -8  -8    1.57    0.30 
  -7  -8  -7    0.31    0.18 
  -7  -8  -7   -0.18    0.14 
  -7  -8  -6    0.70    0.25 
  -7  -8  -6    0.19    0.13 
  -7  -8  -5   -0.04    0.14 
  -7  -8  -4    0.31    0.18 
  -7  -8  -3    1.50    0.32 
  -7  -8  -2    0.02    0.13 
  -7  -8  -1   -0.10    0.19 
  -7  -8   0   -0.05    0.19 
  -7  -8   0    0.17    0.16 
  -7  -8   1    1.28    0.32 
  -7  -8   2    0.14    0.16 
  -7  -8   3   -0.05    0.17 
  -7  -8   4    0.32    0.23 
  -7  -8   5    0.25    0.18 
  -7  -8   5    0.26    0.24 
  -7  -8   6   -0.01    0.19 
  -7  -7 -11    0.20    0.15 
  -7  -7 -10    0.37    0.21 
  -7  -7 -10   -0.06    0.12 
  -7  -7  -9   -0.03    0.16 
  -7  -7  -9    0.00    0.12 
  -7  -7  -8    0.25    0.23 
  -7  -7  -8    0.23    0.16 
  -7  -7  -7    0.57    0.22 
  -7  -7  -7    0.18    0.15 
  -7  -7  -6    2.03    0.35 
  -7  -7  -6    3.34    0.43 
  -7  -7  -5    2.33    0.37 
  -7  -7  -4    0.04    0.12 
  -7  -7  -3    0.00    0.13 
  -7  -7  -2    0.89    0.29 
  -7  -7  -1    1.65    0.32 
  -7  -7   0    2.73    0.40 
  -7  -7   1    1.43    0.32 
  -7  -7   1    1.83    0.35 
  -7  -7   2    0.31    0.23 
  -7  -7   3    0.18    0.15 
  -7  -7   4   -0.01    0.16 
  -7  -7   5    0.67    0.28 
  -7  -7   5    0.19    0.16 
  -7  -7   6    0.10    0.17 
  -7  -7   6    0.34    0.23 
  -7  -7   7    0.00    0.17 
  -7  -6 -11   -0.09    0.15 
  -7  -6 -11   -0.03    0.12 
  -7  -6 -10    0.47    0.23 
  -7  -6 -10    0.35    0.16 
  -7  -6  -9   -0.05    0.16 
  -7  -6  -9    0.08    0.12 
  -7  -6  -8    1.11    0.27 
  -7  -6  -8    0.78    0.24 
  -7  -6  -7    0.44    0.23 
  -7  -6  -7   -0.06    0.16 
  -7  -6  -6    0.37    0.17 
  -7  -6  -5   -0.12    0.15 
  -7  -6  -4    6.92    0.58 
  -7  -6  -3    0.04    0.15 
  -7  -6  -2   11.30    0.74 
  -7  -6  -1    2.34    0.37 
  -7  -6   0    6.85    0.59 
  -7  -6   1    3.56    0.47 
  -7  -6   1    3.04    0.41 
  -7  -6   2    0.62    0.26 
  -7  -6   2    0.55    0.22 
  -7  -6   3    2.25    0.39 
  -7  -6   4   -0.04    0.17 
  -7  -6   5    2.37    0.43 
  -7  -6   5    1.81    0.35 
  -7  -6   6   -0.08    0.15 
  -7  -6   6    0.28    0.20 
  -7  -6   7    0.20    0.16 
  -7  -5 -12    0.70    0.21 
  -7  -5 -12    0.50    0.24 
  -7  -5 -11    0.12    0.14 
  -7  -5 -11    0.11    0.17 
  -7  -5 -10    0.07    0.11 
  -7  -5 -10    0.11    0.20 
  -7  -5  -9    0.19    0.15 
  -7  -5  -9    0.18    0.21 
  -7  -5  -8    1.02    0.24 
  -7  -5  -8    0.83    0.26 
  -7  -5  -7    5.51    0.51 
  -7  -5  -6    3.13    0.40 
  -7  -5  -5    9.58    0.67 
  -7  -5  -5    8.63    0.23 
  -7  -5  -4    3.60    0.41 
  -7  -5  -3    4.08    0.44 
  -7  -5  -2    7.38    0.58 
  -7  -5  -1    7.32    0.57 
  -7  -5   0    2.13    0.34 
  -7  -5   1    6.82    0.57 
  -7  -5   2    0.18    0.19 
  -7  -5   2    0.21    0.15 
  -7  -5   3    6.65    0.63 
   7   5  -3    7.42    0.48 
  -7  -5   4    0.60    0.23 
   7   5  -4    0.72    0.18 
  -7  -5   5    2.79    0.40 
  -7  -5   5    2.48    0.42 
   7   5  -5    2.65    0.34 
  -7  -5   6    0.04    0.12 
  -7  -5   6    0.27    0.18 
   7   5  -6    0.21    0.15 
  -7  -5   7    0.12    0.15 
  -7  -5   7    0.18    0.16 
  -7  -4 -12    0.52    0.20 
  -7  -4 -12    0.39    0.22 
  -7  -4 -11    0.02    0.12 
  -7  -4 -11    0.12    0.15 
  -7  -4 -10    1.33    0.28 
  -7  -4 -10    0.96    0.24 
  -7  -4  -9    1.65    0.31 
  -7  -4  -9    1.00    0.26 
  -7  -4  -8    4.70    0.48 
  -7  -4  -7    4.59    0.47 
  -7  -4  -6   13.35    0.75 
  -7  -4  -5    2.31    0.34 
  -7  -4  -4    6.21    0.52 
  -7  -4  -3    2.42    0.13 
  -7  -4  -3    2.73    0.36 
  -7  -4  -2    0.59    0.19 
  -7  -4  -1    4.81    0.46 
  -7  -4   0    1.35    0.26 
  -7  -4   1    2.48    0.34 
  -7  -4   2    2.40    0.37 
  -7  -4   2    2.28    0.34 
  -7  -4   3    5.91    0.56 
   7   4  -3    5.62    0.43 
  -7  -4   3    5.18    0.48 
  -7  -4   4    1.31    0.30 
   7   4  -4    1.25    0.24 
  -7  -4   5   -0.05    0.13 
  -7  -4   5    0.15    0.14 
   7   4  -5    0.30    0.16 
   7   4  -6    0.30    0.19 
  -7  -4   6    0.12    0.14 
  -7  -4   6    0.10    0.13 
   7   4  -7    0.07    0.16 
  -7  -4   7   -0.11    0.20 
   7   4  -8    0.09    0.17 
  -7  -3 -13    0.80    0.25 
  -7  -3 -13    0.86    0.30 
  -7  -3 -12    0.63    0.23 
  -7  -3 -12    0.52    0.24 
  -7  -3 -11    0.94    0.26 
  -7  -3 -11    0.30    0.21 
  -7  -3 -10    2.05    0.33 
  -7  -3  -9    1.26    0.27 
  -7  -3  -8   14.64    0.82 
  -7  -3  -7    0.24    0.17 
  -7  -3  -6    2.97    0.38 
  -7  -3  -5    1.45    0.26 
  -7  -3  -4    0.37    0.16 
  -7  -3  -3   12.67    0.70 
  -7  -3  -2    0.37    0.08 
  -7  -3  -2    0.33    0.16 
  -7  -3  -1    1.65    0.17 
  -7  -3  -1    1.36    0.24 
  -7  -3   0    2.47    0.32 
  -7  -3   1    3.30    0.36 
  -7  -3   2    0.36    0.15 
  -7  -3   2    0.48    0.16 
  -7  -3   3   -0.17    0.18 
  -7  -3   3   -0.04    0.10 
  -7  -3   4    0.11    0.15 
   7   3  -4    0.06    0.11 
   7   3  -5   -0.09    0.12 
  -7  -3   5   -0.16    0.15 
  -7  -3   5   -0.03    0.11 
  -7  -3   6   -0.08    0.15 
  -7  -3   6    0.04    0.09 
   7   3  -6    0.20    0.17 
  -7  -3   7    0.20    0.16 
   7   3  -7    0.61    0.23 
   7   3  -8    0.78    0.28 
  -7  -2 -13    0.18    0.17 
  -7  -2 -12   -0.01    0.12 
  -7  -2 -11    4.04    0.47 
  -7  -2 -10    0.76    0.25 
  -7  -2  -9    1.77    0.29 
  -7  -2  -8   -0.06    0.16 
  -7  -2  -7    0.49    0.18 
  -7  -2  -6    5.33    0.47 
  -7  -2  -5    3.98    0.42 
  -7  -2  -4    2.04    0.30 
  -7  -2  -3    1.11    0.23 
  -7  -2  -2    0.16    0.12 
  -7  -2  -2    0.27    0.09 
  -7  -2  -1    1.22    0.17 
  -7  -2  -1    1.09    0.21 
  -7  -2   0    0.03    0.11 
  -7  -2   1    0.87    0.20 
   7   2  -2   -0.09    0.14 
  -7  -2   2    0.04    0.10 
  -7  -2   3    0.09    0.15 
   7   2  -3    0.10    0.10 
  -7  -2   3    0.05    0.09 
  -7  -2   4    0.13    0.14 
   7   2  -4    0.06    0.11 
  -7  -2   5   -0.03    0.12 
  -7  -2   5    0.11    0.11 
   7   2  -5    0.02    0.10 
   7   2  -5   -0.02    0.11 
  -7  -2   6   -0.01    0.16 
   7   2  -6   -0.15    0.13 
  -7  -2   7    0.05    0.12 
   7   2  -7   -0.03    0.13 
   7   2  -8    1.42    0.36 
  -7  -1 -14    0.16    0.15 
  -7  -1 -13    2.13    0.38 
  -7  -1 -12    0.48    0.21 
  -7  -1 -11    2.40    0.38 
  -7  -1 -10    0.83    0.24 
  -7  -1  -9    0.21    0.16 
  -7  -1  -8    0.19    0.15 
  -7  -1  -7    0.14    0.15 
  -7  -1  -6    0.15    0.13 
  -7  -1  -5    0.18    0.14 
  -7  -1  -4    1.96    0.28 
  -7  -1  -3    0.51    0.18 
  -7  -1  -2    3.84    0.37 
  -7  -1  -1    0.17    0.12 
   7   1   0    1.12    0.22 
  -7  -1   0    1.17    0.22 
   7   1  -1    2.51    0.34 
  -7  -1   1    2.08    0.27 
   7   1  -2    0.29    0.17 
  -7  -1   2    0.39    0.14 
  -7  -1   3    1.47    0.27 
   7   1  -3    1.63    0.28 
  -7  -1   3    1.27    0.23 
  -7  -1   4    0.28    0.16 
  -7  -1   4    0.22    0.11 
   7   1  -4    0.51    0.18 
  -7  -1   5    1.70    0.30 
   7   1  -5    1.50    0.29 
  -7  -1   6   -0.11    0.17 
   7   1  -6    0.09    0.16 
  -7  -1   7    0.44    0.21 
   7   1  -7    0.06    0.20 
   7   1  -8    0.06    0.16 
  -7   0 -14    0.47    0.26 
  -7   0 -13    3.25    0.46 
  -7   0 -12   -0.07    0.14 
  -7   0 -11    0.91    0.27 
  -7   0 -10    0.65    0.21 
  -7   0  -9    0.34    0.18 
  -7   0  -8    0.44    0.20 
  -7   0  -7    0.03    0.13 
  -7   0  -6    0.03    0.12 
  -7   0  -5    0.97    0.21 
  -7   0  -4    1.99    0.29 
  -7   0  -3    1.64    0.25 
  -7   0  -2    0.07    0.11 
  -7   0  -1    0.12    0.13 
   7   0   1    0.36    0.18 
  -7   0   0    1.07    0.20 
   7   0   0    0.79    0.23 
   7   0  -1    1.38    0.27 
  -7   0   1    1.60    0.23 
  -7   0   2    3.29    0.31 
   7   0  -2    3.18    0.40 
  -7   0   3   -0.11    0.14 
   7   0  -3    0.04    0.15 
  -7   0   3    0.05    0.07 
  -7   0   4    0.60    0.18 
  -7   0   4    0.43    0.12 
   7   0  -4    0.45    0.18 
  -7   0   5    0.52    0.18 
   7   0  -5    0.82    0.24 
  -7   0   6    0.09    0.11 
   7   0  -6    0.39    0.18 
  -7   0   7    0.17    0.13 
  -7   1 -14    0.04    0.14 
  -7   1 -13    0.26    0.18 
  -7   1 -12    1.18    0.30 
  -7   1 -11    0.33    0.21 
  -7   1 -10    0.97    0.26 
  -7   1  -9    0.14    0.18 
  -7   1  -8    0.13    0.12 
  -7   1  -7    0.02    0.12 
  -7   1  -6    1.61    0.29 
  -7   1  -5    3.57    0.39 
  -7   1  -4    0.26    0.14 
   7  -1   3    8.47    0.60 
  -7   1  -3    8.99    0.56 
   7  -1   2    6.66    0.54 
  -7   1  -2    6.45    0.46 
  -7   1  -1    0.68    0.17 
   7  -1   1    0.51    0.19 
  -7   1   0    5.94    0.36 
   7  -1   0    5.87    0.53 
  -7   1   0    5.85    0.42 
   7  -1  -1   10.30    0.71 
  -7   1   1    9.85    0.52 
   7  -1  -2    0.02    0.13 
  -7   1   2    0.11    0.09 
  -7   1   3    1.59    0.28 
   7  -1  -3    1.46    0.31 
  -7   1   3    1.51    0.20 
  -7   1   4    3.48    0.37 
   7  -1  -4    4.00    0.48 
  -7   1   5    0.10    0.13 
   7  -1  -5    0.07    0.15 
  -7   1   6    0.41    0.15 
   7  -1  -6    0.53    0.24 
   7  -1  -7    0.51    0.23 
  -7   2 -14    0.15    0.17 
  -7   2 -13   -0.17    0.18 
  -7   2 -12    0.31    0.22 
  -7   2 -11    0.00    0.15 
  -7   2 -10    0.08    0.16 
  -7   2  -9    4.38    0.49 
  -7   2  -8   -0.11    0.13 
  -7   2  -7    9.41    0.67 
  -7   2  -6    8.27    0.61 
  -7   2  -5    9.47    0.62 
   7  -2   4   18.71    0.90 
  -7   2  -4   18.62    0.84 
  -7   2  -3    1.90    0.28 
   7  -2   3    1.71    0.32 
   7  -2   2    5.69    0.52 
  -7   2  -2    6.84    0.47 
  -7   2  -1    0.79    0.14 
  -7   2  -1    0.56    0.16 
   7  -2   1    0.77    0.24 
  -7   2   0    0.02    0.05 
  -7   2   0    0.01    0.10 
   7  -2   0    0.06    0.14 
  -7   2   1   -0.12    0.10 
   7  -2  -1    0.01    0.13 
  -7   2   2    5.44    0.36 
   7  -2  -2    5.98    0.59 
  -7   2   3    8.98    0.54 
  -7   2   3    9.02    0.43 
   7  -2  -3    8.78    0.70 
  -7   2   4    1.47    0.23 
   7  -2  -4    2.10    0.37 
  -7   2   5    0.12    0.10 
   7  -2  -5   -0.22    0.16 
   7  -2  -6    0.31    0.23 
   7  -2  -7    0.49    0.25 
   7  -3  13    0.18    0.19 
  -7   3 -13   -0.10    0.16 
   7  -3  12   -0.17    0.17 
  -7   3 -12    0.07    0.14 
   7  -3  11    2.24    0.41 
  -7   3 -11    2.58    0.42 
   7  -3  10    0.03    0.17 
  -7   3 -10    0.30    0.20 
   7  -3   9    0.38    0.20 
   7  -3   8    3.56    0.44 
   7  -3   7    3.37    0.40 
  -7   3  -7    4.18    0.47 
   7  -3   6    8.06    0.58 
  -7   3  -6    9.11    0.65 
  -7   3  -5    5.01    0.48 
   7  -3   4    0.04    0.17 
  -7   3  -4    0.12    0.12 
  -7   3  -3    1.91    0.27 
   7  -3   3    1.62    0.32 
  -7   3  -2    0.41    0.16 
   7  -3   2    0.60    0.23 
  -7   3  -1    7.26    0.39 
   7  -3   1    8.51    0.67 
  -7   3  -1    6.79    0.46 
  -7   3   0    3.12    0.23 
  -7   3   0    3.12    0.30 
   7  -3   0    3.33    0.44 
   7  -3  -1   22.73    1.11 
  -7   3   1   23.30    0.77 
  -7   3   2    9.84    0.47 
   7  -3  -2   11.97    0.82 
  -7   3   3    0.11    0.10 
   7  -3  -3    0.87    0.29 
   7  -3  -4    1.19    0.32 
   7  -3  -5   -0.18    0.17 
   7  -3  -6   -0.01    0.14 
   7  -3  -7    0.05    0.20 
   7  -3  -8    0.17    0.22 
  -7   4 -13    1.41    0.38 
   7  -4  12    0.71    0.27 
   7  -4  11    0.36    0.21 
   7  -4  10    0.73    0.23 
   7  -4   9    0.15    0.18 
   7  -4   8    6.90    0.60 
   7  -4   7   -0.24    0.18 
   7  -4   6    0.61    0.18 
   7  -4   5    3.72    0.37 
   7  -4   5    3.41    0.42 
   7  -4   4    0.33    0.21 
  -7   4  -4    0.51    0.17 
  -7   4  -3    2.87    0.35 
   7  -4   3    2.82    0.42 
  -7   4  -2    1.38    0.24 
   7  -4   2    1.50    0.34 
   7  -4   1    9.15    0.71 
  -7   4  -1    9.16    0.54 
   7  -4   0   16.20    0.96 
  -7   4   0   16.59    0.70 
  -7   4   1    0.18    0.10 
   7  -4  -1    0.16    0.17 
   7  -4  -2   11.13    0.82 
  -7   4   2   10.46    0.47 
   7  -4  -3    2.29    0.39 
   7  -4  -4    1.23    0.31 
   7  -4  -5   -0.01    0.16 
   7  -4  -6    0.84    0.31 
   7  -4  -7    1.77    0.41 
   7  -4  -8    0.38    0.24 
   7  -5  12   -0.01    0.17 
   7  -5  11    0.38    0.24 
   7  -5  10    1.54    0.35 
   7  -5   9    2.36    0.38 
   7  -5   8    1.62    0.33 
   7  -5   7    4.00    0.45 
   7  -5   6   -0.10    0.13 
   7  -5   6   -0.01    0.19 
   7  -5   5    1.68    0.28 
   7  -5   5    1.34    0.33 
   7  -5   4    0.15    0.12 
   7  -5   4    0.01    0.19 
   7  -5   3    9.04    0.71 
   7  -5   2    1.20    0.30 
  -7   5  -2    1.35    0.24 
   7  -5   1   11.31    0.81 
  -7   5  -1   11.12    0.61 
  -7   5   0    2.66    0.29 
   7  -5   0    2.60    0.43 
  -7   5   1    2.01    0.24 
   7  -5  -1    1.70    0.35 
   7  -5  -2    0.36    0.22 
   7  -5  -3    0.74    0.27 
   7  -5  -4    0.71    0.25 
   7  -5  -5    0.91    0.29 
   7  -5  -6   -0.25    0.22 
   7  -5  -7    0.02    0.19 
   7  -6  11    0.11    0.16 
   7  -6  10    0.05    0.17 
   7  -6   9   -0.20    0.18 
   7  -6   8    0.67    0.23 
   7  -6   7    0.32    0.17 
   7  -6   6    1.00    0.23 
   7  -6   6    1.60    0.32 
   7  -6   5   -0.12    0.13 
   7  -6   5    0.03    0.17 
   7  -6   4    2.86    0.33 
   7  -6   4    2.42    0.40 
   7  -6   3    6.43    0.46 
   7  -6   3    6.64    0.66 
   7  -6   2    3.71    0.53 
  -7   6  -1    0.25    0.14 
   7  -6   1    0.24    0.26 
  -7   6   0    0.66    0.16 
   7  -6   0    1.34    0.34 
   7  -6  -1    0.14    0.20 
   7  -6  -2   -0.21    0.20 
   7  -6  -3   -0.11    0.19 
   7  -6  -4   -0.02    0.18 
   7  -6  -5    0.53    0.23 
   7  -6  -6    0.58    0.26 
   7  -7  10   -0.36    0.22 
   7  -7   9    0.45    0.22 
   7  -7   8   -0.02    0.12 
   7  -7   7   -0.06    0.12 
   7  -7   6    0.52    0.17 
   7  -7   6    0.70    0.25 
   7  -7   5    1.94    0.30 
   7  -7   5    1.78    0.39 
   7  -7   4    2.67    0.33 
   7  -7   4    2.91    0.45 
   7  -7   3    0.25    0.14 
   7  -7   3    0.48    0.27 
   7  -7   2    0.05    0.10 
   7  -7   2    0.43    0.27 
   7  -7   1    1.05    0.32 
  -7   7  -1    0.30    0.12 
  -7   7   0    2.28    0.29 
   7  -7   0    2.86    0.46 
   7  -7  -1   -0.31    0.24 
   7  -7  -2   -0.09    0.21 
   7  -7  -3   -0.29    0.25 
   7  -7  -4   -0.26    0.27 
   7  -8  10   -0.14    0.22 
   7  -8   9    0.78    0.28 
   7  -8   8    0.45    0.21 
   7  -8   7    0.53    0.22 
   7  -8   7    0.91    0.27 
   7  -8   6    0.58    0.22 
   7  -8   6    0.68    0.25 
   7  -8   5    0.27    0.17 
   7  -8   5    0.13    0.16 
   7  -8   4    1.75    0.30 
   7  -8   4    2.20    0.42 
   7  -8   3    0.79    0.18 
   7  -8   3    0.94    0.30 
   7  -8   2    3.79    0.53 
   7  -8   1    0.30    0.23 
   7  -8   0    0.91    0.31 
   7  -8  -1   -0.16    0.24 
   7  -8  -2   -0.04    0.20 
   7  -8  -3   -0.01    0.23 
   7  -9   9    0.18    0.14 
   7  -9   8    0.41    0.22 
   7  -9   7    0.17    0.19 
   7  -9   6    0.43    0.21 
   7  -9   6    0.35    0.23 
   7  -9   5   -0.16    0.15 
   7  -9   5    0.33    0.21 
   7  -9   4    0.24    0.15 
   7  -9   4    0.34    0.27 
   7  -9   3    0.27    0.21 
   7  -9   2    0.52    0.29 
   7  -9   1    0.54    0.27 
   7  -9   0   -0.08    0.20 
   7  -9  -1    1.72    0.40 
   7  -9  -2    0.21    0.25 
   7 -10   8    0.55    0.25 
   7 -10   7    0.34    0.22 
   7 -10   6    0.15    0.16 
   7 -10   5    0.02    0.20 
   7 -10   4    0.59    0.30 
   7 -10   3    1.00    0.37 
   7 -10   2    0.16    0.25 
   7 -10   1    0.51    0.30 
   7 -10   0    1.88    0.45 
   7 -11   7    0.50    0.24 
   7 -11   4    1.85    0.44 
   7 -11   3    0.19    0.25 
   7 -11   2    2.31    0.53 
  -8 -12  -4    0.97    0.30 
  -8 -12  -3    1.30    0.33 
  -8 -11  -8    0.33    0.22 
  -8 -11  -7    2.05    0.42 
  -8 -11  -6   -0.10    0.19 
  -8 -11  -5    0.47    0.23 
  -8 -11  -4    0.80    0.25 
  -8 -11  -4    1.05    0.31 
  -8 -11  -3    0.08    0.15 
  -8 -11  -3    0.25    0.22 
  -8 -11  -2    0.14    0.17 
  -8 -11  -1    0.54    0.23 
  -8 -10  -9    0.73    0.26 
  -8 -10  -8    1.23    0.37 
  -8 -10  -8   -0.24    0.19 
  -8 -10  -7    0.01    0.14 
  -8 -10  -6    0.31    0.22 
  -8 -10  -5    0.19    0.20 
  -8 -10  -4    0.00    0.17 
  -8 -10  -3    0.38    0.19 
  -8 -10  -2    0.14    0.17 
  -8 -10  -2    0.16    0.20 
  -8 -10  -1    0.37    0.21 
  -8 -10   0   -0.14    0.18 
  -8 -10   1   -0.12    0.18 
  -8  -9 -10    0.01    0.13 
  -8  -9  -9    0.44    0.27 
  -8  -9  -9   -0.11    0.14 
  -8  -9  -8    0.63    0.27 
  -8  -9  -8   -0.05    0.14 
  -8  -9  -7   -0.01    0.18 
  -8  -9  -6    0.36    0.18 
  -8  -9  -5    0.18    0.19 
  -8  -9  -4    0.19    0.14 
  -8  -9  -3    0.19    0.17 
  -8  -9  -2    0.44    0.21 
  -8  -9  -1   -0.09    0.15 
  -8  -9  -1   -0.25    0.22 
  -8  -9   0    0.06    0.16 
  -8  -9   0    0.20    0.22 
  -8  -9   1   -0.02    0.16 
  -8  -9   2   -0.09    0.13 
  -8  -8 -10    0.19    0.17 
  -8  -8 -10    0.14    0.14 
  -8  -8  -9    0.27    0.20 
  -8  -8  -9    0.06    0.17 
  -8  -8  -8   -0.14    0.14 
  -8  -8  -7   -0.01    0.14 
  -8  -8  -6    0.09    0.11 
  -8  -8  -5    0.39    0.22 
  -8  -8  -4    1.73    0.37 
  -8  -8  -3    0.45    0.20 
  -8  -8  -2    0.17    0.17 
  -8  -8  -1    0.93    0.29 
  -8  -8   0    0.08    0.13 
  -8  -8   0   -0.02    0.14 
  -8  -8   1    0.05    0.14 
  -8  -8   1    0.11    0.17 
  -8  -8   2    0.67    0.31 
  -8  -8   3   -0.03    0.18 
  -8  -8   5    0.55    0.26 
  -8  -7 -11    0.75    0.26 
  -8  -7 -10    0.80    0.28 
  -8  -7 -10   -0.03    0.12 
  -8  -7  -9    0.74    0.28 
  -8  -7  -9    0.05    0.15 
  -8  -7  -8    0.26    0.16 
  -8  -7  -7    0.47    0.21 
  -8  -7  -6    0.40    0.19 
  -8  -7  -5   -0.02    0.14 
  -8  -7  -4    0.25    0.22 
  -8  -7  -3    3.11    0.44 
  -8  -7  -2    1.29    0.30 
  -8  -7  -1    0.64    0.23 
  -8  -7   0    0.62    0.21 
  -8  -7   1    1.19    0.32 
  -8  -7   1    0.73    0.24 
  -8  -7   2    3.20    0.48 
  -8  -7   3    0.43    0.25 
  -8  -7   4   -0.03    0.15 
  -8  -7   5    0.13    0.14 
  -8  -7   6    0.31    0.22 
  -8  -6 -12    0.44    0.18 
  -8  -6 -11    1.33    0.38 
  -8  -6 -11    0.69    0.25 
  -8  -6 -10    0.14    0.16 
  -8  -6 -10    0.20    0.16 
  -8  -6  -9    0.64    0.22 
  -8  -6  -8    0.72    0.22 
  -8  -6  -7    0.24    0.16 
  -8  -6  -6    0.19    0.16 
  -8  -6  -5    0.01    0.12 
  -8  -6  -4    3.94    0.47 
  -8  -6  -3    1.24    0.28 
  -8  -6  -2    0.23    0.17 
  -8  -6  -1    0.77    0.24 
  -8  -6   0   11.72    0.82 
  -8  -6   1    0.19    0.22 
  -8  -6   1   -0.02    0.15 
  -8  -6   2    3.55    0.48 
  -8  -6   2    3.68    0.47 
  -8  -6   3   -0.19    0.21 
  -8  -6   4    0.13    0.16 
  -8  -6   5   -0.13    0.17 
  -8  -6   5   -0.07    0.12 
  -8  -6   6    0.24    0.18 
  -8  -5 -12    0.13    0.15 
  -8  -5 -11    0.65    0.22 
  -8  -5 -10    0.05    0.12 
  -8  -5  -9   -0.17    0.18 
  -8  -5  -8    0.18    0.14 
  -8  -5  -7    2.95    0.40 
  -8  -5  -6    8.02    0.65 
  -8  -5  -5    0.47    0.20 
  -8  -5  -4    1.17    0.28 
  -8  -5  -3    3.21    0.41 
  -8  -5  -2    9.46    0.69 
  -8  -5  -1    2.70    0.40 
  -8  -5   0    5.15    0.51 
  -8  -5   1    0.37    0.18 
  -8  -5   2    0.29    0.16 
  -8  -5   2    0.45    0.19 
  -8  -5   3    0.42    0.22 
  -8  -5   4    0.20    0.20 
  -8  -5   5    0.83    0.26 
  -8  -5   5    0.38    0.19 
  -8  -5   6    0.03    0.16 
  -8  -5   6    0.05    0.13 
  -8  -4 -13   -0.10    0.11 
  -8  -4 -12    0.13    0.13 
  -8  -4 -11    0.44    0.23 
  -8  -4 -10    0.08    0.16 
  -8  -4  -9    1.05    0.27 
  -8  -4  -8   10.36    0.74 
  -8  -4  -7    0.16    0.17 
  -8  -4  -6   21.53    1.02 
  -8  -4  -5    4.39    0.47 
  -8  -4  -4   12.70    0.78 
  -8  -4  -3   19.06    0.94 
  -8  -4  -2   18.72    0.93 
  -8  -4  -1    1.03    0.26 
  -8  -4   0   -0.11    0.14 
  -8  -4   1    0.62    0.22 
  -8  -4   2    0.20    0.21 
  -8  -4   2    0.44    0.21 
  -8  -4   3    0.12    0.13 
  -8  -4   3    0.15    0.13 
  -8  -4   4    0.07    0.18 
  -8  -4   5    0.19    0.17 
  -8  -4   5    0.33    0.16 
  -8  -4   6    0.19    0.18 
  -8  -4   7    0.39    0.22 
  -8  -3 -13    0.18    0.19 
  -8  -3 -12   -0.18    0.16 
  -8  -3 -11    0.75    0.24 
  -8  -3 -10    0.70    0.24 
  -8  -3  -9    1.35    0.29 
  -8  -3  -8    5.38    0.53 
  -8  -3  -7    3.80    0.45 
  -8  -3  -6    0.70    0.24 
  -8  -3  -5   24.44    1.05 
  -8  -3  -4   16.10    0.85 
  -8  -3  -3    0.46    0.10 
  -8  -3  -3    0.31    0.18 
  -8  -3  -2    0.75    0.12 
  -8  -3  -2    1.18    0.25 
  -8  -3  -1    5.80    0.51 
  -8  -3  -1    3.97    0.29 
  -8  -3   0    0.25    0.15 
  -8  -3   1    0.30    0.16 
  -8  -3   2    0.24    0.19 
  -8  -3   2   -0.02    0.12 
  -8  -3   3    0.14    0.16 
  -8  -3   3   -0.01    0.11 
  -8  -3   4    1.39    0.31 
  -8  -3   5    0.15    0.21 
  -8  -3   6    0.52    0.24 
  -8  -3   7   -0.17    0.17 
  -8  -2 -14    0.83    0.27 
  -8  -2 -13    0.27    0.21 
  -8  -2 -12    0.20    0.16 
  -8  -2 -11    2.41    0.40 
  -8  -2 -10    1.31    0.31 
  -8  -2  -9    1.35    0.29 
  -8  -2  -8   -0.09    0.17 
  -8  -2  -7    5.97    0.54 
  -8  -2  -6    5.31    0.50 
  -8  -2  -5    1.50    0.28 
  -8  -2  -4    0.09    0.16 
  -8  -2  -3    1.83    0.28 
  -8  -2  -2    7.70    0.56 
  -8  -2  -1    0.10    0.11 
  -8  -2   0    2.16    0.30 
  -8  -2   1    0.32    0.15 
  -8  -2   2    5.36    0.46 
  -8  -2   3    0.23    0.18 
   8   2  -3    0.08    0.14 
  -8  -2   3    0.11    0.11 
  -8  -2   4    1.17    0.27 
   8   2  -4    1.15    0.26 
  -8  -2   5    0.16    0.16 
   8   2  -5    0.36    0.17 
  -8  -2   6   -0.06    0.13 
  -8  -2   7    0.23    0.18 
  -8  -1 -14   -0.28    0.19 
  -8  -1 -13    0.76    0.26 
  -8  -1 -12    0.60    0.24 
  -8  -1 -11    0.75    0.22 
  -8  -1 -10    0.35    0.18 
  -8  -1  -9    1.30    0.32 
  -8  -1  -8    0.07    0.12 
  -8  -1  -7    3.65    0.44 
  -8  -1  -6    0.08    0.15 
  -8  -1  -5    0.58    0.19 
  -8  -1  -4   12.90    0.74 
  -8  -1  -3    1.51    0.27 
  -8  -1  -2    2.52    0.33 
  -8  -1  -1    0.70    0.19 
   8   1   0    2.91    0.38 
  -8  -1   0    2.95    0.34 
  -8  -1   1    6.95    0.50 
   8   1  -1    6.44    0.56 
   8   1  -2   -0.04    0.14 
  -8  -1   2    0.14    0.12 
  -8  -1   3    3.52    0.43 
  -8  -1   3    2.97    0.34 
   8   1  -3    3.08    0.41 
  -8  -1   4    0.17    0.18 
  -8  -1   4    0.00    0.08 
   8   1  -4    0.04    0.14 
  -8  -1   5    1.88    0.34 
   8   1  -5    2.04    0.34 
  -8  -1   6    0.22    0.17 
  -8  -1   7    0.02    0.13 
  -8   0 -14   -0.03    0.15 
  -8   0 -13    0.58    0.22 
  -8   0 -12    0.12    0.16 
  -8   0 -11    0.79    0.26 
  -8   0 -10    4.09    0.51 
  -8   0  -9    1.48    0.33 
  -8   0  -8    4.75    0.50 
  -8   0  -7    0.24    0.20 
  -8   0  -6   10.71    0.71 
  -8   0  -5    0.32    0.17 
  -8   0  -4    3.60    0.40 
  -8   0  -3    0.90    0.22 
  -8   0  -2    4.98    0.44 
   8   0   1   11.78    0.76 
  -8   0  -1   10.44    0.63 
   8   0   0    0.44    0.19 
  -8   0   0    1.05    0.22 
   8   0  -1    4.28    0.49 
  -8   0   1    3.79    0.36 
   8   0  -2    1.67    0.33 
  -8   0   2    1.28    0.22 
  -8   0   3    0.64    0.18 
   8   0  -3    0.63    0.22 
  -8   0   3    0.57    0.15 
  -8   0   4    0.11    0.13 
   8   0  -4    0.34    0.16 
  -8   0   5    0.13    0.14 
   8   0  -5    0.16    0.18 
  -8   0   6    0.84    0.24 
   8   0  -6    1.08    0.28 
  -8   1 -14    0.12    0.15 
  -8   1 -13    0.64    0.24 
  -8   1 -12    0.43    0.23 
  -8   1 -11    0.83    0.28 
  -8   1 -10    1.78    0.36 
  -8   1  -9    0.10    0.14 
  -8   1  -8    2.90    0.41 
  -8   1  -7    8.81    0.66 
  -8   1  -6    0.03    0.17 
  -8   1  -5   14.56    0.80 
  -8   1  -4    0.08    0.13 
   8  -1   3    9.74    0.71 
  -8   1  -3    8.64    0.58 
  -8   1  -2    0.88    0.20 
   8  -1   2    1.06    0.32 
  -8   1  -1    0.89    0.21 
   8  -1   1    1.17    0.26 
   8  -1   0    7.36    0.64 
  -8   1   0    8.23    0.53 
   8  -1  -1    0.53    0.26 
  -8   1   1    0.48    0.16 
   8  -1  -2    0.23    0.18 
  -8   1   2    0.39    0.13 
  -8   1   3    0.44    0.17 
   8  -1  -3    0.16    0.15 
  -8   1   4    1.02    0.22 
   8  -1  -4    0.87    0.27 
  -8   1   5    0.07    0.11 
   8  -1  -5    0.03    0.17 
   8  -1  -6    2.47    0.43 
  -8   2 -13    0.20    0.20 
  -8   2 -12    0.07    0.17 
  -8   2 -11   -0.01    0.17 
  -8   2 -10    0.50    0.20 
  -8   2  -9    3.04    0.43 
  -8   2  -8    0.56    0.22 
  -8   2  -7   10.38    0.73 
  -8   2  -6    3.96    0.46 
  -8   2  -5    1.97    0.31 
   8  -2   4    0.27    0.19 
  -8   2  -4    0.09    0.13 
  -8   2  -3   -0.10    0.14 
   8  -2   3   -0.34    0.23 
  -8   2  -2    3.55    0.38 
   8  -2   2    3.20    0.43 
   8  -2   1    6.08    0.60 
  -8   2  -1    5.26    0.43 
  -8   2   0    0.14    0.12 
   8  -2   0    0.12    0.20 
   8  -2  -1    3.88    0.50 
  -8   2   1    4.28    0.36 
   8  -2  -2    0.47    0.25 
  -8   2   2    0.40    0.11 
  -8   2   3    0.01    0.09 
   8  -2  -3    0.51    0.27 
   8  -2  -4    0.48    0.24 
   8  -2  -5    0.51    0.25 
   8  -2  -6    0.79    0.26 
   8  -2  -7    0.36    0.24 
  -8   3 -13    0.30    0.22 
  -8   3 -12    0.98    0.30 
  -8   3 -11    0.13    0.20 
  -8   3 -10    2.89    0.47 
  -8   3  -9    1.01    0.29 
  -8   3  -8    4.13    0.50 
  -8   3  -7    0.68    0.22 
  -8   3  -6    1.83    0.31 
  -8   3  -5    0.16    0.15 
  -8   3  -4   -0.10    0.14 
   8  -3   4    0.06    0.20 
  -8   3  -3    1.90    0.30 
   8  -3   3    2.18    0.40 
  -8   3  -2    0.73    0.20 
   8  -3   2    0.58    0.26 
  -8   3  -1    1.14    0.22 
   8  -3   1    0.75    0.28 
  -8   3   0    1.11    0.20 
   8  -3   0    0.82    0.28 
  -8   3   1    2.52    0.28 
   8  -3  -1    2.96    0.47 
   8  -3  -2    0.18    0.21 
   8  -3  -3    0.69    0.28 
   8  -3  -4    2.26    0.43 
   8  -3  -5    0.35    0.26 
   8  -3  -6   -0.15    0.20 
   8  -3  -7    0.33    0.26 
   8  -4  12    2.37    0.48 
  -8   4 -12    2.35    0.47 
   8  -4  11    0.34    0.24 
  -8   4 -11    0.10    0.20 
   8  -4  10    3.04    0.47 
  -8   4 -10    2.88    0.45 
   8  -4   9    4.16    0.51 
  -8   4  -9    5.47    0.60 
   8  -4   8    0.12    0.13 
  -8   4  -8    0.18    0.14 
  -8   4  -7    6.22    0.60 
  -8   4  -6    5.11    0.54 
   8  -4   5    0.54    0.23 
  -8   4  -5    1.04    0.27 
   8  -4   4    6.39    0.61 
  -8   4  -4    7.02    0.56 
  -8   4  -3    0.07    0.11 
   8  -4   3    0.10    0.22 
  -8   4  -2    0.51    0.17 
   8  -4   2    0.59    0.26 
  -8   4  -1    1.55    0.25 
   8  -4   1    1.89    0.43 
  -8   4   0    1.05    0.19 
   8  -4   0    1.28    0.33 
  -8   4   1    0.10    0.07 
   8  -4  -1    0.14    0.27 
   8  -4  -2    0.97    0.32 
   8  -4  -3    1.79    0.41 
   8  -4  -4    0.24    0.22 
   8  -4  -5    0.35    0.27 
   8  -4  -6    0.73    0.30 
   8  -5  11    0.56    0.28 
   8  -5  10    0.29    0.21 
   8  -5   9    0.08    0.15 
   8  -5   8    0.16    0.15 
   8  -5   7    0.43    0.19 
   8  -5   6    6.85    0.56 
   8  -5   6    7.18    0.64 
   8  -5   5    0.46    0.24 
  -8   5  -5    0.50    0.24 
   8  -5   4   -0.07    0.20 
  -8   5  -4   -0.11    0.15 
  -8   5  -3    0.31    0.14 
   8  -5   3    0.12    0.22 
  -8   5  -2    1.03    0.23 
   8  -5   2    1.49    0.38 
  -8   5  -1    1.40    0.24 
   8  -5   1    2.05    0.40 
  -8   5   0    0.16    0.12 
   8  -5   0    0.60    0.28 
   8  -5  -1    4.15    0.57 
   8  -5  -2    0.60    0.29 
   8  -5  -3    0.15    0.23 
   8  -5  -4    0.50    0.29 
   8  -5  -5    0.71    0.30 
   8  -6  11    0.14    0.16 
   8  -6  10    0.31    0.21 
   8  -6   9    0.08    0.15 
   8  -6   8    2.32    0.38 
   8  -6   7    0.05    0.13 
   8  -6   6    0.41    0.18 
   8  -6   6    0.12    0.20 
   8  -6   5    0.26    0.16 
   8  -6   5    0.14    0.19 
   8  -6   4    0.26    0.23 
  -8   6  -4    0.27    0.20 
   8  -6   3    0.74    0.30 
  -8   6  -3    0.63    0.21 
  -8   6  -2    2.46    0.33 
   8  -6   2    2.96    0.49 
   8  -6   1    6.72    0.69 
  -8   6  -1    6.09    0.48 
   8  -6   0    2.73    0.50 
   8  -6  -1    0.44    0.27 
   8  -6  -2    0.67    0.31 
   8  -6  -3   -0.14    0.22 
   8  -6  -4    0.43    0.25 
   8  -7  10    0.47    0.25 
   8  -7   9    0.25    0.19 
   8  -7   8    0.49    0.21 
   8  -7   7    0.19    0.15 
   8  -7   6    0.27    0.16 
   8  -7   6    0.40    0.27 
   8  -7   5    0.22    0.14 
   8  -7   5    0.28    0.26 
   8  -7   4    1.13    0.23 
   8  -7   4    1.25    0.34 
  -8   7  -3    2.96    0.40 
   8  -7   3    3.37    0.51 
   8  -7   2    0.37    0.27 
  -8   7  -2    0.25    0.15 
  -8   7  -1    0.53    0.17 
   8  -7   1    0.88    0.31 
   8  -7   0    0.72    0.33 
   8  -7  -1    0.68    0.33 
   8  -7  -2    0.27    0.22 
   8  -7  -3    0.48    0.29 
   8  -8   9    0.02    0.12 
   8  -8   8    0.04    0.14 
   8  -8   7   -0.18    0.16 
   8  -8   7    0.23    0.21 
   8  -8   6    1.06    0.26 
   8  -8   6    1.08    0.27 
   8  -8   5    0.27    0.16 
   8  -8   5    0.31    0.22 
   8  -8   4    0.33    0.27 
   8  -8   3    0.41    0.27 
   8  -8   2    0.39    0.25 
  -8   8  -2    0.05    0.16 
   8  -8   1    0.67    0.30 
   8  -8   0    0.20    0.31 
   8  -8  -1    0.82    0.35 
   8  -9   8    0.07    0.17 
   8  -9   7    0.88    0.28 
   8  -9   7    0.70    0.28 
   8  -9   6    0.08    0.13 
   8  -9   6   -0.17    0.23 
   8  -9   5    0.10    0.22 
   8  -9   4   -0.45    0.23 
   8  -9   3    2.08    0.49 
   8  -9   2    0.37    0.31 
   8  -9   1    2.34    0.50 
   8  -9   0    1.37    0.43 
   8 -10   7   -0.04    0.12 
   8 -10   6   -0.08    0.22 
   8 -10   5    2.29    0.52 
   8 -10   4    0.12    0.24 
   8 -10   3    0.55    0.33 
   8 -10   2    3.34    0.57 
  -9 -11  -4   -0.29    0.20 
  -9 -11  -3   -0.03    0.16 
  -9 -10  -7    0.18    0.21 
  -9 -10  -6    0.85    0.30 
  -9 -10  -5   -0.06    0.17 
  -9 -10  -4    0.37    0.21 
  -9 -10  -3    0.63    0.26 
  -9 -10  -2    0.36    0.20 
  -9 -10  -1   -0.19    0.20 
  -9  -9 -10    0.34    0.21 
  -9  -9  -9    0.11    0.18 
  -9  -9  -8    0.84    0.27 
  -9  -9  -7    0.03    0.15 
  -9  -9  -6    0.13    0.18 
  -9  -9  -5    1.50    0.37 
  -9  -9  -4   -0.12    0.17 
  -9  -9  -3    0.78    0.26 
  -9  -9  -2    0.12    0.21 
  -9  -9  -1   -0.21    0.21 
  -9  -9  -1   -0.07    0.21 
  -9  -9   0    0.76    0.29 
  -9  -9   0    0.17    0.15 
  -9  -8 -11    0.07    0.13 
  -9  -8 -10    0.26    0.16 
  -9  -8  -9    0.37    0.20 
  -9  -8  -8    0.02    0.15 
  -9  -8  -7    1.11    0.33 
  -9  -8  -6   -0.10    0.15 
  -9  -8  -5    0.70    0.26 
  -9  -8  -4    0.19    0.15 
  -9  -8  -3    0.00    0.16 
  -9  -8  -2    0.12    0.18 
  -9  -8  -1   -0.12    0.12 
  -9  -8   0    0.26    0.19 
  -9  -8   0    0.23    0.21 
  -9  -8   1    0.30    0.18 
  -9  -8   1    0.25    0.21 
  -9  -8   2    1.84    0.42 
  -9  -7 -11    1.02    0.30 
  -9  -7 -10    0.17    0.20 
  -9  -7  -9    0.47    0.19 
  -9  -7  -8    0.66    0.23 
  -9  -7  -7    0.55    0.26 
  -9  -7  -6    0.22    0.19 
  -9  -7  -5    0.30    0.20 
  -9  -7  -4    0.51    0.25 
  -9  -7  -3    0.03    0.13 
  -9  -7  -2    0.77    0.28 
  -9  -7  -1    0.65    0.24 
  -9  -7   0    4.20    0.53 
  -9  -7   1    1.33    0.36 
  -9  -7   1    1.14    0.30 
  -9  -7   2    3.46    0.53 
  -9  -7   3    1.64    0.39 
  -9  -7   5   -0.08    0.15 
  -9  -6 -12    0.22    0.18 
  -9  -6 -11    0.12    0.13 
  -9  -6 -10    0.62    0.26 
  -9  -6  -9    0.69    0.23 
  -9  -6  -8    0.05    0.17 
  -9  -6  -7    0.04    0.18 
  -9  -6  -6    0.09    0.13 
  -9  -6  -5    0.02    0.17 
  -9  -6  -4   -0.18    0.20 
  -9  -6  -3    0.96    0.29 
  -9  -6  -2    0.69    0.24 
  -9  -6  -1    1.59    0.31 
  -9  -6   0    3.11    0.45 
  -9  -6   1    1.50    0.33 
  -9  -6   1    1.75    0.35 
  -9  -6   2    1.86    0.39 
  -9  -6   2    1.54    0.33 
  -9  -6   3    0.50    0.29 
  -9  -6   4    0.33    0.20 
  -9  -6   5    0.05    0.14 
  -9  -5 -13    0.24    0.19 
  -9  -5 -12    0.09    0.12 
  -9  -5 -11    0.88    0.27 
  -9  -5 -10    0.38    0.22 
  -9  -5  -9    0.75    0.26 
  -9  -5  -8    0.86    0.26 
  -9  -5  -7    0.61    0.22 
  -9  -5  -6    0.97    0.26 
  -9  -5  -5    1.73    0.34 
  -9  -5  -4    1.51    0.33 
  -9  -5  -3   -0.03    0.15 
  -9  -5  -2    1.38    0.29 
  -9  -5  -1    1.19    0.29 
  -9  -5   0    0.60    0.22 
  -9  -5   1    0.14    0.16 
  -9  -5   2    0.51    0.23 
  -9  -5   2    0.65    0.23 
  -9  -5   3    0.55    0.24 
  -9  -5   4    0.04    0.15 
  -9  -5   5   -0.11    0.21 
  -9  -4 -13   -0.15    0.15 
  -9  -4 -12   -0.05    0.17 
  -9  -4 -11    0.17    0.18 
  -9  -4 -10    0.30    0.16 
  -9  -4  -9    0.23    0.18 
  -9  -4  -8    0.34    0.17 
  -9  -4  -7    0.15    0.12 
  -9  -4  -6    0.09    0.13 
  -9  -4  -5   -0.06    0.14 
  -9  -4  -4    0.32    0.18 
  -9  -4  -3    6.06    0.56 
  -9  -4  -2    1.99    0.34 
  -9  -4  -1    1.82    0.32 
  -9  -4   0    1.94    0.35 
  -9  -4   1    3.46    0.42 
  -9  -4   2    1.62    0.35 
  -9  -4   2    1.36    0.29 
  -9  -4   3    2.24    0.41 
  -9  -4   3    2.09    0.35 
  -9  -4   4    0.62    0.26 
  -9  -4   5    0.48    0.24 
  -9  -3 -14   -0.09    0.13 
  -9  -3 -13   -0.15    0.15 
  -9  -3 -12    0.26    0.17 
  -9  -3 -11   -0.02    0.16 
  -9  -3 -10   -0.03    0.17 
  -9  -3  -9    0.86    0.26 
  -9  -3  -8    1.36    0.32 
  -9  -3  -7    0.34    0.18 
  -9  -3  -6    0.37    0.18 
  -9  -3  -5    1.37    0.27 
  -9  -3  -4    2.18    0.34 
  -9  -3  -3    4.73    0.49 
  -9  -3  -2    1.27    0.28 
  -9  -3  -1    6.14    0.55 
  -9  -3   0    0.26    0.18 
  -9  -3   1    5.40    0.53 
  -9  -3   2   -0.06    0.14 
  -9  -3   2    0.11    0.13 
  -9  -3   3    0.44    0.22 
  -9  -3   3    0.34    0.21 
  -9  -3   4    0.14    0.15 
  -9  -3   5    0.11    0.19 
  -9  -3   6    0.59    0.27 
  -9  -2 -14   -0.14    0.15 
  -9  -2 -13    0.27    0.20 
  -9  -2 -12    0.43    0.25 
  -9  -2 -11    0.58    0.25 
  -9  -2 -10    0.06    0.13 
  -9  -2  -9    0.18    0.16 
  -9  -2  -8    0.14    0.12 
  -9  -2  -7    1.99    0.38 
  -9  -2  -6    1.99    0.34 
  -9  -2  -5   15.13    0.88 
  -9  -2  -4    3.69    0.44 
  -9  -2  -3    6.32    0.55 
  -9  -2  -2    2.63    0.36 
  -9  -2  -1    4.17    0.44 
  -9  -2   0    2.46    0.34 
  -9  -2   1    0.69    0.22 
  -9  -2   2    0.33    0.15 
  -9  -2   3    1.25    0.29 
  -9  -2   3    1.09    0.24 
  -9  -2   4    1.27    0.31 
  -9  -2   5    0.99    0.27 
  -9  -2   6    0.30    0.20 
  -9  -2   7    0.13    0.16 
  -9  -1 -13    0.19    0.20 
  -9  -1 -12    0.31    0.22 
  -9  -1 -11   -0.01    0.17 
  -9  -1 -10    0.23    0.19 
  -9  -1  -9    2.68    0.42 
  -9  -1  -8    0.71    0.26 
  -9  -1  -7   21.20    1.06 
  -9  -1  -6    1.12    0.29 
  -9  -1  -5    2.07    0.35 
  -9  -1  -4    0.19    0.14 
  -9  -1  -3    0.13    0.12 
  -9  -1  -2    6.42    0.53 
  -9  -1  -1    3.23    0.39 
  -9  -1   0    0.96    0.22 
  -9  -1   1    6.30    0.51 
   9   1  -1    6.38    0.61 
   9   1  -2    1.35    0.30 
  -9  -1   2    1.73    0.29 
  -9  -1   3    1.59    0.31 
   9   1  -3    1.37    0.31 
  -9  -1   3    1.53    0.27 
  -9  -1   4    0.11    0.14 
   9   1  -4   -0.07    0.13 
  -9  -1   5    0.16    0.14 
   9   1  -5    0.19    0.20 
  -9  -1   6    0.10    0.15 
  -9   0 -13   -0.09    0.17 
  -9   0 -12   -0.19    0.19 
  -9   0 -11    0.21    0.19 
  -9   0 -10    0.27    0.18 
  -9   0  -9    5.75    0.59 
  -9   0  -8   -0.07    0.18 
  -9   0  -7    0.18    0.17 
  -9   0  -6    0.06    0.14 
  -9   0  -5   10.37    0.71 
  -9   0  -4    2.25    0.34 
  -9   0  -3    7.35    0.59 
  -9   0  -2   -0.03    0.11 
   9   0   1    7.31    0.64 
  -9   0  -1    7.80    0.57 
   9   0   0    0.68    0.24 
  -9   0   0    0.65    0.18 
   9   0  -1    2.56    0.40 
  -9   0   1    2.09    0.29 
   9   0  -2    2.98    0.45 
  -9   0   2    2.32    0.30 
  -9   0   3    0.21    0.18 
   9   0  -3    0.04    0.14 
  -9   0   4   -0.09    0.12 
   9   0  -4   -0.05    0.15 
  -9   0   5    0.06    0.12 
   9   0  -5    0.38    0.22 
  -9   1 -13    0.19    0.18 
  -9   1 -12   -0.21    0.19 
  -9   1 -11    0.18    0.20 
  -9   1 -10    0.51    0.22 
  -9   1  -9   -0.10    0.18 
  -9   1  -8    0.31    0.18 
  -9   1  -7   10.88    0.77 
  -9   1  -6    0.21    0.15 
  -9   1  -5    8.54    0.65 
  -9   1  -4    4.63    0.47 
  -9   1  -3    2.61    0.35 
  -9   1  -2    3.91    0.41 
   9  -1   2    3.65    0.48 
  -9   1  -1    3.54    0.39 
   9  -1   1    4.03    0.51 
  -9   1   0    2.74    0.33 
   9  -1   0    3.04    0.47 
   9  -1  -1    5.23    0.59 
  -9   1   1    5.09    0.43 
   9  -1  -2    0.19    0.21 
  -9   1   2    0.00    0.08 
  -9   1   3    0.92    0.23 
   9  -1  -3    0.24    0.21 
  -9   1   4    0.28    0.17 
   9  -1  -4    0.48    0.22 
   9  -1  -5    1.31    0.35 
   9  -1  -6    0.22    0.17 
  -9   2 -12   -0.08    0.15 
  -9   2 -11    0.15    0.18 
  -9   2 -10   -0.12    0.17 
  -9   2  -9    0.87    0.26 
  -9   2  -8    0.24    0.16 
  -9   2  -7    0.75    0.23 
  -9   2  -6    0.26    0.16 
  -9   2  -5    0.35    0.19 
  -9   2  -4    0.28    0.17 
  -9   2  -3    2.72    0.35 
   9  -2   3    2.93    0.45 
  -9   2  -2    2.38    0.33 
   9  -2   2    2.57    0.43 
   9  -2   1   12.14    0.87 
  -9   2  -1    9.99    0.63 
  -9   2   0    1.13    0.23 
   9  -2   0    1.16    0.34 
   9  -2  -1    1.32    0.35 
  -9   2   1    1.17    0.21 
   9  -2  -2    0.49    0.24 
   9  -2  -3    0.96    0.32 
   9  -2  -4    0.58    0.30 
   9  -2  -5    0.08    0.18 
   9  -2  -6    0.44    0.25 
  -9   3 -12    1.06    0.30 
  -9   3 -11    0.17    0.16 
  -9   3 -10    3.71    0.52 
  -9   3  -9    0.61    0.24 
  -9   3  -8   -0.04    0.15 
  -9   3  -7    1.98    0.36 
  -9   3  -6    0.17    0.14 
  -9   3  -5    2.42    0.36 
  -9   3  -4    0.44    0.19 
   9  -3   4    0.28    0.22 
  -9   3  -3    1.34    0.27 
   9  -3   3    1.83    0.38 
  -9   3  -2    0.29    0.13 
   9  -3   2    0.31    0.23 
  -9   3  -1    0.03    0.11 
   9  -3   1    0.31    0.21 
  -9   3   0    0.06    0.09 
   9  -3   0    0.67    0.31 
   9  -3  -1   -0.03    0.23 
   9  -3  -2    0.10    0.21 
   9  -3  -3    1.79    0.42 
   9  -3  -4    0.70    0.28 
   9  -3  -5    0.86    0.32 
   9  -3  -6    0.51    0.29 
  -9   4 -11    0.45    0.23 
  -9   4 -10    0.01    0.14 
  -9   4  -9    1.38    0.32 
  -9   4  -8    0.49    0.26 
  -9   4  -7    0.34    0.22 
  -9   4  -6    0.92    0.27 
  -9   4  -5    0.03    0.15 
   9  -4   5   -0.32    0.26 
  -9   4  -4    0.36    0.17 
   9  -4   4    0.23    0.19 
  -9   4  -3    0.06    0.14 
   9  -4   3   -0.06    0.20 
  -9   4  -2    1.83    0.30 
   9  -4   2    1.56    0.36 
  -9   4  -1    0.78    0.19 
   9  -4   1    0.68    0.27 
  -9   4   0    2.32    0.30 
   9  -4   0    3.27    0.53 
   9  -4  -1    1.28    0.39 
   9  -4  -2    0.49    0.30 
   9  -4  -3    0.63    0.28 
   9  -4  -4    0.69    0.34 
  -9   5 -10    0.47    0.28 
  -9   5  -9    0.06    0.16 
  -9   5  -8    0.59    0.24 
  -9   5  -7   -0.05    0.18 
  -9   5  -6    0.54    0.24 
   9  -5   5    1.05    0.33 
  -9   5  -5    1.44    0.28 
  -9   5  -4    0.13    0.19 
   9  -5   4   -0.03    0.22 
  -9   5  -3    1.77    0.31 
   9  -5   3    1.08    0.35 
  -9   5  -2    0.82    0.22 
   9  -5   2    1.36    0.38 
  -9   5  -1    0.24    0.14 
   9  -5   1    0.71    0.28 
   9  -5   0    1.12    0.38 
   9  -5  -1    0.32    0.31 
   9  -5  -2    0.22    0.31 
   9  -5  -3    0.29    0.26 
   9  -6  10   -0.07    0.15 
  -9   6 -10    0.04    0.18 
   9  -6   9    0.38    0.22 
  -9   6  -9    0.38    0.26 
   9  -6   8    0.09    0.19 
  -9   6  -8    0.09    0.16 
  -9   6  -7    0.46    0.25 
   9  -6   6    0.23    0.24 
  -9   6  -6    0.26    0.22 
   9  -6   5    0.78    0.28 
  -9   6  -5    0.74    0.24 
   9  -6   4    1.06    0.32 
  -9   6  -4    0.72    0.24 
  -9   6  -3    1.61    0.31 
   9  -6   3    1.80    0.43 
  -9   6  -2    1.79    0.30 
   9  -6   2    2.85    0.53 
  -9   6  -1    1.11    0.23 
   9  -6   1    1.51    0.38 
   9  -6   0    0.38    0.26 
   9  -6  -1    1.32    0.41 
   9  -6  -2    0.89    0.38 
   9  -7   9    0.61    0.24 
   9  -7   8    0.33    0.22 
   9  -7   7    0.34    0.21 
   9  -7   6    0.66    0.25 
  -9   7  -6    0.58    0.25 
   9  -7   5    0.92    0.33 
  -9   7  -5    0.44    0.22 
  -9   7  -4    3.25    0.45 
   9  -7   4    2.80    0.50 
  -9   7  -3    0.87    0.24 
   9  -7   3    1.21    0.35 
  -9   7  -2    0.88    0.23 
   9  -7   2    1.35    0.38 
   9  -7   1    1.07    0.40 
   9  -7   0    1.03    0.38 
   9  -7  -1    0.97    0.37 
   9  -8   9    0.32    0.22 
   9  -8   8    0.32    0.18 
   9  -8   7    0.20    0.13 
   9  -8   7    0.22    0.25 
   9  -8   6    0.19    0.15 
   9  -8   6    0.26    0.27 
   9  -8   5    1.49    0.40 
  -9   8  -5    1.48    0.33 
   9  -8   4    0.10    0.26 
  -9   8  -4    0.25    0.20 
  -9   8  -3    0.36    0.16 
   9  -8   3    0.05    0.20 
   9  -8   2    0.95    0.41 
   9  -8   1    2.14    0.54 
   9  -9   8   -0.02    0.14 
   9  -9   7   -0.01    0.20 
   9  -9   6    0.89    0.35 
   9  -9   5   -0.21    0.31 
   9  -9   4   -0.11    0.26 
  -9   9  -4   -0.09    0.14 
   9  -9   3    0.99    0.38 
   9 -10   6    1.37    0.41 
 -10  -9  -6    0.18    0.17 
 -10  -9  -5    0.44    0.22 
 -10  -9  -4    0.03    0.19 
 -10  -8  -9    0.75    0.25 
 -10  -8  -8    0.65    0.27 
 -10  -8  -7    1.70    0.39 
 -10  -8  -6    0.44    0.27 
 -10  -8  -5    1.25    0.33 
 -10  -8  -4    0.51    0.25 
 -10  -8  -3    0.50    0.25 
 -10  -8  -2    0.47    0.24 
 -10  -8  -1   -0.03    0.13 
 -10  -8   0    0.37    0.28 
 -10  -8   0    0.29    0.21 
 -10  -7 -10   -0.08    0.14 
 -10  -7  -9    0.91    0.30 
 -10  -7  -8    0.39    0.18 
 -10  -7  -7    0.98    0.27 
 -10  -7  -6    0.26    0.19 
 -10  -7  -5   -0.30    0.19 
 -10  -7  -4    0.45    0.25 
 -10  -7  -3    0.48    0.24 
 -10  -7  -2    0.57    0.24 
 -10  -7  -1    0.02    0.16 
 -10  -7   0   -0.10    0.21 
 -10  -7   0    0.01    0.14 
 -10  -7   1    0.21    0.20 
 -10  -7   1    0.22    0.14 
 -10  -6 -11   -0.12    0.16 
 -10  -6 -10    0.05    0.19 
 -10  -6  -9    1.12    0.31 
 -10  -6  -8    0.89    0.31 
 -10  -6  -7    0.35    0.19 
 -10  -6  -6    0.11    0.14 
 -10  -6  -5    0.17    0.16 
 -10  -6  -4    0.48    0.21 
 -10  -6  -3    0.12    0.16 
 -10  -6  -2    0.42    0.22 
 -10  -6  -1   -0.11    0.20 
 -10  -6   0   -0.36    0.21 
 -10  -6   1   -0.23    0.21 
 -10  -6   1   -0.12    0.18 
 -10  -6   2    0.11    0.21 
 -10  -6   2    0.34    0.20 
 -10  -5 -12    0.41    0.22 
 -10  -5 -11    0.64    0.24 
 -10  -5 -10    0.16    0.16 
 -10  -5  -9    0.45    0.23 
 -10  -5  -8    1.31    0.31 
 -10  -5  -7    0.38    0.24 
 -10  -5  -6    0.31    0.18 
 -10  -5  -5    1.49    0.35 
 -10  -5  -4    2.05    0.40 
 -10  -5  -3    0.11    0.16 
 -10  -5  -2    0.00    0.17 
 -10  -5  -1   -0.12    0.15 
 -10  -5   0    0.26    0.18 
 -10  -5   1    0.37    0.22 
 -10  -5   1    0.26    0.19 
 -10  -5   2    0.53    0.25 
 -10  -5   2    0.52    0.21 
 -10  -5   3    0.17    0.24 
 -10  -4 -12   -0.26    0.22 
 -10  -4 -11   -0.09    0.19 
 -10  -4 -10    1.02    0.31 
 -10  -4  -9    0.06    0.14 
 -10  -4  -8    0.53    0.22 
 -10  -4  -7    1.66    0.36 
 -10  -4  -6    0.01    0.15 
 -10  -4  -5    0.77    0.27 
 -10  -4  -4    1.51    0.33 
 -10  -4  -3    2.56    0.41 
 -10  -4  -2    0.56    0.23 
 -10  -4  -1    0.10    0.15 
 -10  -4   0    1.52    0.32 
 -10  -4   1    0.38    0.18 
 -10  -4   2    0.17    0.19 
 -10  -4   2   -0.01    0.12 
 -10  -4   3    0.65    0.26 
 -10  -4   3    0.83    0.25 
 -10  -4   4   -0.06    0.15 
 -10  -3 -12    1.06    0.31 
 -10  -3 -11    0.22    0.20 
 -10  -3 -10   -0.06    0.18 
 -10  -3  -9   -0.01    0.16 
 -10  -3  -8    0.49    0.23 
 -10  -3  -7    0.54    0.22 
 -10  -3  -6    0.85    0.25 
 -10  -3  -5    3.37    0.45 
 -10  -3  -4    0.69    0.24 
 -10  -3  -3    1.25    0.29 
 -10  -3  -2    1.24    0.29 
 -10  -3  -1    2.73    0.39 
 -10  -3   0    0.36    0.18 
 -10  -3   1    0.91    0.25 
 -10  -3   2    0.36    0.24 
 -10  -3   2   -0.15    0.15 
 -10  -3   3    0.04    0.17 
 -10  -3   3    0.01    0.11 
 -10  -3   4    1.18    0.34 
 -10  -3   5   -0.22    0.19 
 -10  -2 -12    0.26    0.22 
 -10  -2 -11    0.52    0.23 
 -10  -2 -10    0.69    0.27 
 -10  -2  -9    0.28    0.20 
 -10  -2  -8    0.22    0.21 
 -10  -2  -7   -0.03    0.15 
 -10  -2  -6    5.77    0.59 
 -10  -2  -5    4.98    0.54 
 -10  -2  -4    0.25    0.15 
 -10  -2  -3    5.04    0.53 
 -10  -2  -2    0.66    0.23 
 -10  -2  -1    1.21    0.27 
 -10  -2   0    0.17    0.14 
 -10  -2   1    0.25    0.19 
 -10  -2   2    0.15    0.14 
 -10  -2   2    0.21    0.14 
 -10  -2   3    1.30    0.33 
 -10  -2   4    0.29    0.19 
 -10  -2   5    0.21    0.17 
 -10  -1 -12    0.80    0.30 
 -10  -1 -11    0.22    0.16 
 -10  -1 -10    0.02    0.14 
 -10  -1  -9   -0.09    0.15 
 -10  -1  -8    3.75    0.50 
 -10  -1  -7    1.84    0.35 
 -10  -1  -6    0.56    0.22 
 -10  -1  -5    0.82    0.21 
 -10  -1  -4    0.57    0.20 
 -10  -1  -3    0.04    0.12 
 -10  -1  -2    0.13    0.12 
 -10  -1  -1   -0.08    0.13 
 -10  -1   0    0.20    0.13 
 -10  -1   1    1.89    0.31 
 -10  -1   2    0.23    0.18 
 -10  -1   2    0.26    0.17 
 -10  -1   3    0.82    0.26 
  10   1  -3    0.37    0.20 
 -10  -1   4    0.01    0.13 
  10   1  -4    0.00    0.16 
 -10  -1   5    0.15    0.15 
 -10   0 -12    0.29    0.17 
 -10   0 -11   -0.10    0.18 
 -10   0 -10    0.70    0.27 
 -10   0  -9    0.16    0.15 
 -10   0  -8    0.21    0.18 
 -10   0  -7    0.28    0.20 
 -10   0  -6    1.43    0.31 
 -10   0  -5    2.08    0.35 
 -10   0  -4    0.14    0.16 
 -10   0  -3    0.24    0.18 
 -10   0  -2    5.10    0.50 
 -10   0  -1    0.67    0.21 
  10   0   0   -0.36    0.23 
 -10   0   0    0.09    0.13 
  10   0  -1    1.08    0.29 
 -10   0   1    0.81    0.21 
  10   0  -2    0.09    0.16 
 -10   0   3    0.10    0.13 
  10   0  -3    0.36    0.22 
 -10   0   4    0.27    0.20 
  10   0  -4    0.01    0.16 
 -10   1 -12    1.03    0.31 
 -10   1 -11   -0.02    0.19 
 -10   1 -10    0.00    0.17 
 -10   1  -9    0.09    0.15 
 -10   1  -8    2.78    0.42 
 -10   1  -7    0.36    0.20 
 -10   1  -6    0.06    0.12 
 -10   1  -5    1.19    0.27 
 -10   1  -4    2.01    0.34 
 -10   1  -3    2.09    0.34 
 -10   1  -2    0.11    0.11 
  10  -1   2   -0.32    0.26 
 -10   1  -1    2.99    0.37 
  10  -1   1    2.92    0.47 
  10  -1   0    0.56    0.28 
 -10   1   0    0.40    0.15 
  10  -1  -1    0.32    0.22 
 -10   1   1   -0.10    0.11 
  10  -1  -2    0.24    0.22 
  10  -1  -3    0.13    0.17 
  10  -1  -4    0.54    0.28 
  10  -1  -5   -0.22    0.20 
 -10   2 -11    0.19    0.17 
 -10   2 -10    5.66    0.64 
 -10   2  -9    0.05    0.16 
 -10   2  -8    1.44    0.32 
 -10   2  -7    0.31    0.19 
 -10   2  -6    0.07    0.19 
 -10   2  -5    1.57    0.30 
 -10   2  -4    0.42    0.21 
  10  -2   3    6.58    0.69 
 -10   2  -3    6.51    0.57 
 -10   2  -2    2.60    0.35 
  10  -2   2    2.19    0.42 
 -10   2  -1    0.24    0.14 
  10  -2   1    0.63    0.28 
  10  -2   0    0.51    0.22 
 -10   2   0    0.27    0.14 
  10  -2  -1    0.47    0.27 
  10  -2  -2    0.10    0.19 
  10  -2  -3    0.88    0.31 
  10  -2  -4    0.17    0.23 
  10  -2  -5    0.11    0.24 
 -10   3 -11   -0.14    0.15 
 -10   3 -10    0.31    0.19 
 -10   3  -9    0.52    0.24 
 -10   3  -8    0.53    0.26 
 -10   3  -7   -0.36    0.20 
 -10   3  -6    2.53    0.40 
 -10   3  -5    1.25    0.30 
 -10   3  -4    0.09    0.14 
  10  -3   4   -0.07    0.17 
 -10   3  -3    0.43    0.19 
  10  -3   3    0.17    0.25 
 -10   3  -2    0.00    0.11 
  10  -3   2   -0.19    0.26 
 -10   3  -1    1.46    0.27 
  10  -3   1    1.87    0.40 
  10  -3   0    0.24    0.24 
  10  -3  -1    0.98    0.34 
  10  -3  -2    0.34    0.27 
  10  -3  -3   -0.33    0.26 
  10  -3  -4    0.34    0.29 
 -10   4 -10    0.54    0.26 
 -10   4  -9    0.07    0.17 
 -10   4  -8    0.52    0.27 
 -10   4  -7    0.12    0.16 
 -10   4  -6    0.85    0.26 
  10  -4   5    0.35    0.23 
 -10   4  -5    0.37    0.19 
 -10   4  -4    0.40    0.17 
  10  -4   4    0.29    0.23 
 -10   4  -3    0.06    0.10 
  10  -4   3    0.21    0.22 
 -10   4  -2    0.06    0.12 
  10  -4   2    0.07    0.20 
 -10   4  -1    0.28    0.13 
  10  -4   1    0.14    0.24 
  10  -4   0    0.28    0.26 
  10  -4  -1   -0.10    0.23 
  10  -4  -2    0.14    0.27 
 -10   5  -9    0.05    0.13 
 -10   5  -8    0.44    0.25 
 -10   5  -7    0.01    0.14 
 -10   5  -6    0.89    0.27 
 -10   5  -5    0.52    0.20 
  10  -5   5    0.07    0.22 
 -10   5  -4    0.11    0.14 
  10  -5   4    0.16    0.25 
 -10   5  -3   -0.11    0.16 
  10  -5   3    0.62    0.34 
 -10   5  -2   -0.07    0.12 
  10  -5   2    0.45    0.31 
  10  -5   1    0.32    0.27 
  10  -5   0    0.26    0.23 
  10  -5  -1    0.49    0.34 
 -10   6  -8   -0.14    0.19 
 -10   6  -7    2.82    0.47 
  10  -6   6   -0.18    0.23 
 -10   6  -6   -0.10    0.13 
 -10   6  -5    0.81    0.26 
  10  -6   5    1.23    0.36 
 -10   6  -4    0.12    0.15 
  10  -6   4   -0.03    0.23 
 -10   6  -3    0.12    0.18 
  10  -6   3    0.44    0.34 
 -10   6  -2    0.24    0.14 
  10  -6   2    0.91    0.33 
  10  -6   1   -0.06    0.29 
  10  -6   0    0.30    0.32 
 -10   7  -7   -0.09    0.16 
  10  -7   6    1.05    0.38 
 -10   7  -6    0.58    0.21 
  10  -7   5    0.56    0.36 
 -10   7  -5    0.31    0.18 
 -10   7  -4   -0.09    0.12 
  10  -7   4   -0.16    0.24 
 -10   7  -3    0.16    0.15 
  10  -7   3   -0.01    0.22 
  10  -7   2    0.69    0.36 
  10  -8   6    0.60    0.34 
 -10   8  -6    0.10    0.16 
  10  -8   5    0.39    0.31 
 -10   8  -5    0.23    0.16 
 -10   8  -4    2.13    0.39 
  10  -8   4    1.71    0.42 
 -10   9  -5   -0.01    0.15 
 -11  -7  -7   -0.02    0.16 
 -11  -7  -6    0.26    0.19 
 -11  -7  -5   -0.01    0.17 
 -11  -7  -4    0.29    0.20 
 -11  -7  -3    0.12    0.13 
 -11  -7  -2    0.94    0.33 
 -11  -7  -1    0.18    0.21 
 -11  -6  -9    0.54    0.25 
 -11  -6  -8    0.29    0.20 
 -11  -6  -7    0.14    0.19 
 -11  -6  -6    0.50    0.24 
 -11  -6  -5    0.25    0.19 
 -11  -6  -4    0.67    0.27 
 -11  -6  -3    0.06    0.15 
 -11  -6  -2    0.51    0.24 
 -11  -6  -1    0.36    0.25 
 -11  -6   0    0.65    0.26 
 -11  -6   1    0.53    0.21 
 -11  -6   2    0.20    0.20 
 -11  -5 -10    0.02    0.17 
 -11  -5  -9    0.33    0.21 
 -11  -5  -8    0.27    0.18 
 -11  -5  -7    0.17    0.14 
 -11  -5  -6    0.89    0.30 
 -11  -5  -5    0.14    0.20 
 -11  -5  -4    0.68    0.24 
 -11  -5  -3   -0.11    0.13 
 -11  -5  -2    1.49    0.37 
 -11  -5  -1    0.38    0.22 
 -11  -5   0    0.04    0.19 
 -11  -5   1    0.32    0.27 
 -11  -5   1    0.30    0.18 
 -11  -5   2    0.03    0.12 
 -11  -4 -10   -0.03    0.18 
 -11  -4  -9    0.09    0.16 
 -11  -4  -8    0.55    0.27 
 -11  -4  -7    0.10    0.19 
 -11  -4  -6   -0.02    0.15 
 -11  -4  -5    1.01    0.30 
 -11  -4  -4    0.19    0.17 
 -11  -4  -3    0.11    0.14 
 -11  -4  -2    0.11    0.16 
 -11  -4  -1    0.43    0.21 
 -11  -4   0    0.01    0.12 
 -11  -4   1    0.49    0.22 
 -11  -4   2   -0.06    0.16 
 -11  -4   2    0.33    0.21 
 -11  -3 -11   -0.15    0.17 
 -11  -3 -10    0.18    0.18 
 -11  -3  -9    0.44    0.21 
 -11  -3  -8   -0.05    0.16 
 -11  -3  -7    0.03    0.14 
 -11  -3  -6    0.38    0.19 
 -11  -3  -5    0.39    0.17 
 -11  -3  -4    0.17    0.16 
 -11  -3  -3    0.73    0.24 
 -11  -3  -2   -0.11    0.15 
 -11  -3  -1    0.49    0.22 
 -11  -3   0    0.18    0.18 
 -11  -3   1   -0.04    0.16 
 -11  -3   2   -0.15    0.20 
 -11  -3   2    0.04    0.13 
 -11  -3   3    0.12    0.19 
 -11  -2 -11    0.87    0.30 
 -11  -2 -10   -0.10    0.20 
 -11  -2  -9    0.49    0.22 
 -11  -2  -8    0.42    0.22 
 -11  -2  -7    0.37    0.22 
 -11  -2  -6   -0.34    0.19 
 -11  -2  -5   -0.07    0.14 
 -11  -2  -4    1.52    0.32 
 -11  -2  -3    1.29    0.31 
 -11  -2  -2   -0.07    0.13 
 -11  -2  -1    1.54    0.32 
 -11  -2   0   -0.03    0.14 
 -11  -2   1    0.40    0.19 
 -11  -2   2    0.14    0.16 
 -11  -2   3    0.13    0.19 
 -11  -2   4   -0.02    0.14 
 -11  -1 -11    0.25    0.18 
 -11  -1 -10    0.87    0.29 
 -11  -1  -9    0.07    0.18 
 -11  -1  -8    0.15    0.17 
 -11  -1  -7    1.36    0.32 
 -11  -1  -6    1.57    0.33 
 -11  -1  -5    0.25    0.16 
 -11  -1  -4   -0.04    0.14 
 -11  -1  -3    1.10    0.28 
 -11  -1  -2    0.00    0.12 
 -11  -1  -1    0.57    0.19 
 -11  -1   0   -0.01    0.12 
 -11  -1   1    0.37    0.18 
 -11  -1   2   -0.07    0.13 
 -11  -1   3    0.09    0.19 
 -11   0 -11   -0.09    0.13 
 -11   0 -10    0.56    0.26 
 -11   0  -9    3.00    0.48 
 -11   0  -8    2.03    0.40 
 -11   0  -7   -0.27    0.18 
 -11   0  -6    0.10    0.12 
 -11   0  -5    0.18    0.18 
 -11   0  -4    1.33    0.30 
 -11   0  -3   -0.02    0.14 
 -11   0  -2   -0.12    0.17 
 -11   0  -1    0.12    0.14 
 -11   0   0    0.04    0.11 
  11   0  -1   -0.22    0.22 
 -11   0   2   -0.06    0.16 
  11   0  -2    0.05    0.20 
  11   0  -3   -0.19    0.23 
  11   0  -4    0.92    0.31 
 -11   1 -10    0.54    0.26 
 -11   1  -9    0.13    0.17 
 -11   1  -8    0.38    0.20 
 -11   1  -7    0.92    0.28 
 -11   1  -6    0.46    0.19 
 -11   1  -5    0.50    0.23 
 -11   1  -4    1.57    0.32 
 -11   1  -3    0.34    0.16 
 -11   1  -2    0.21    0.11 
  11  -1   1   -0.30    0.25 
 -11   1  -1    0.04    0.12 
  11  -1   0    0.82    0.30 
 -11   1   0    0.08    0.11 
  11  -1  -1    0.38    0.29 
  11  -1  -2   -0.04    0.21 
  11  -1  -3    0.43    0.24 
 -11   2 -10    0.19    0.25 
 -11   2  -9    0.69    0.25 
 -11   2  -8    0.52    0.23 
 -11   2  -7    0.27    0.17 
 -11   2  -6    0.35    0.21 
 -11   2  -5    0.55    0.21 
 -11   2  -4    0.51    0.21 
 -11   2  -3    0.79    0.24 
 -11   2  -2    0.55    0.20 
  11  -2   2    0.62    0.29 
 -11   2  -1   -0.10    0.11 
  11  -2   1    0.29    0.19 
  11  -2   0    0.07    0.24 
  11  -2  -1   -0.44    0.28 
  11  -2  -2    0.33    0.25 
 -11   3 -10    0.98    0.30 
 -11   3  -9    0.12    0.23 
 -11   3  -8    0.15    0.13 
 -11   3  -7    0.23    0.20 
 -11   3  -6    0.63    0.24 
 -11   3  -5    0.24    0.17 
 -11   3  -4    0.20    0.15 
 -11   3  -3    0.40    0.19 
  11  -3   3    0.04    0.22 
 -11   3  -2   -0.03    0.13 
  11  -3   2   -0.16    0.24 
  11  -3   1    0.14    0.20 
  11  -3   0    0.27    0.30 
  11  -3  -1    1.74    0.46 
 -11   4  -9    0.48    0.22 
 -11   4  -8    0.78    0.28 
 -11   4  -7    1.33    0.32 
 -11   4  -6    0.54    0.23 
 -11   4  -5    0.46    0.20 
 -11   4  -4   -0.04    0.16 
  11  -4   4    0.12    0.20 
 -11   4  -3   -0.08    0.12 
  11  -4   3    0.06    0.27 
 -11   4  -2   -0.08    0.13 
  11  -4   2    0.06    0.24 
  11  -4   1    0.81    0.38 
  11  -4   0    0.47    0.35 
 -11   5  -8   -0.04    0.17 
 -11   5  -7    0.16    0.17 
 -11   5  -6    0.38    0.22 
  11  -5   5    1.25    0.39 
 -11   5  -5    0.81    0.26 
 -11   5  -4   -0.24    0.18 
  11  -5   4    0.24    0.25 
 -11   5  -3    0.31    0.16 
  11  -5   3    0.44    0.29 
  11  -5   2    0.19    0.32 
 -11   6  -7   -0.05    0.16 
 -11   6  -6    0.42    0.23 
 -11   6  -5   -0.03    0.13 
  11  -6   5   -0.07    0.29 
 -11   6  -4    0.92    0.28 
  11  -6   4    0.48    0.29 
 -11   7  -6   -0.32    0.23 
 -11   7  -5    0.14    0.17 
 -11   7  -4    0.04    0.14 
 -11   8  -5    0.38    0.23 
 -12  -5  -7    0.06    0.18 
 -12  -5  -6    0.05    0.15 
 -12  -5  -5    0.43    0.24 
 -12  -5  -4    0.24    0.22 
 -12  -5  -3    1.24    0.32 
 -12  -5  -2   -0.06    0.18 
 -12  -5  -1    0.00    0.15 
 -12  -5   0    0.75    0.27 
 -12  -5   1    0.12    0.20 
 -12  -4  -8    0.32    0.20 
 -12  -4  -7    0.88    0.28 
 -12  -4  -6    0.39    0.26 
 -12  -4  -5    1.48    0.36 
 -12  -4  -4    0.22    0.21 
 -12  -4  -3    0.77    0.25 
 -12  -4  -2    0.17    0.19 
 -12  -4  -1    0.27    0.17 
 -12  -4   0    0.06    0.18 
 -12  -4   1    0.16    0.19 
 -12  -3  -9    0.29    0.21 
 -12  -3  -8    0.16    0.20 
 -12  -3  -7    0.11    0.17 
 -12  -3  -6    0.35    0.22 
 -12  -3  -5    0.32    0.20 
 -12  -3  -4    0.73    0.28 
 -12  -3  -3    0.93    0.28 
 -12  -3  -2    0.07    0.15 
 -12  -3  -1    0.05    0.16 
 -12  -3   0   -0.02    0.15 
 -12  -3   1   -0.11    0.16 
 -12  -2  -9    0.07    0.16 
 -12  -2  -8    0.30    0.20 
 -12  -2  -7   -0.07    0.14 
 -12  -2  -6   -0.17    0.21 
 -12  -2  -5    0.43    0.26 
 -12  -2  -4   -0.06    0.18 
 -12  -2  -3    0.04    0.15 
 -12  -2  -2   -0.31    0.22 
 -12  -2  -1    0.33    0.20 
 -12  -2   0    0.17    0.17 
 -12  -1  -9    0.39    0.25 
 -12  -1  -8    1.06    0.32 
 -12  -1  -7   -0.03    0.16 
 -12  -1  -6    0.11    0.16 
 -12  -1  -5    0.35    0.22 
 -12  -1  -4    1.25    0.32 
 -12  -1  -3    0.19    0.16 
 -12  -1  -2   -0.10    0.13 
 -12  -1  -1    0.17    0.15 
 -12  -1   0    0.48    0.19 
 -12  -1   2    0.27    0.18 
 -12   0  -9   -0.05    0.19 
 -12   0  -8    0.09    0.17 
 -12   0  -7    0.33    0.23 
 -12   0  -6    1.20    0.31 
 -12   0  -5    0.46    0.23 
 -12   0  -4   -0.08    0.16 
 -12   0  -3    0.20    0.14 
 -12   0  -2    1.15    0.28 
 -12   0  -1    0.69    0.21 
 -12   1  -9   -0.19    0.15 
 -12   1  -8    0.14    0.16 
 -12   1  -7   -0.06    0.17 
 -12   1  -6    0.17    0.17 
 -12   1  -5   -0.09    0.13 
 -12   1  -4    3.60    0.49 
 -12   1  -3    1.72    0.34 
 -12   1  -2    1.46    0.32 
 -12   1  -1    0.25    0.13 
 -12   2  -8    0.46    0.24 
 -12   2  -7    0.25    0.21 
 -12   2  -6    2.19    0.41 
 -12   2  -5    2.36    0.41 
 -12   2  -4    1.40    0.30 
 -12   2  -3    1.96    0.38 
 -12   2  -2    1.55    0.31 
  12  -2   1    0.39    0.32 
 -12   3  -8    2.97    0.51 
 -12   3  -7    0.13    0.17 
 -12   3  -6    3.13    0.47 
 -12   3  -5    0.27    0.22 
 -12   3  -4    0.90    0.27 
 -12   3  -3    0.79    0.24 
 -12   4  -7    0.04    0.15 
 -12   4  -6    0.22    0.20 
 -12   4  -5   -0.03    0.15 
 -12   4  -4    0.23    0.16 
 -12   4  -3    0.17    0.18 
 -12   5  -6   -0.13    0.13 
 -12   5  -5    0.69    0.25 
 -12   5  -4    0.09    0.12 
 -12   6  -5    0.85    0.29 
 -13  -3  -5    1.12    0.33 
 -13  -3  -4   -0.14    0.17 
 -13  -3  -3    0.45    0.21 
 -13  -3  -2   -0.14    0.20 
 -13  -3  -1    0.19    0.17 
 -13  -3   0    0.23    0.19 
 -13  -2  -6    0.38    0.21 
 -13  -2  -5    0.30    0.21 
 -13  -2  -4    0.23    0.19 
 -13  -2  -3    0.00    0.14 
 -13  -2  -2    0.07    0.18 
 -13  -2  -1    0.15    0.17 
 -13  -1  -6   -0.03    0.18 
 -13  -1  -5    0.61    0.26 
 -13  -1  -4    0.24    0.19 
 -13  -1  -3    0.38    0.21 
 -13  -1  -2    0.19    0.17 
 -13  -1  -1    1.34    0.33 
 -13   0  -6    0.23    0.19 
 -13   0  -5    0.16    0.17 
 -13   0  -4   -0.05    0.16 
 -13   0  -3    1.60    0.35 
 -13   0  -2    0.17    0.17 
 -13   1  -6    0.99    0.30 
 -13   1  -5    1.47    0.36 
 -13   1  -4    0.83    0.27 
 -13   1  -3    3.29    0.49 
 -13   1  -2    0.44    0.20 
 -13   2  -6    1.65    0.38 
 -13   2  -5    0.19    0.19 
 -13   2  -4    1.61    0.36 
 -13   2  -3   -0.11    0.16 
 -13   3  -5    0.60    0.24 
 -13   3  -4    0.46    0.23 
 -13   4  -5    0.30    0.17 
 -13   4  -4    0.09    0.14 
   0   0   0    0.00    0.00 
; 
_shelx_hkl_checksum              19777 
_symmetry_cell_setting           Triclinic 
_symmetry_space_group_name_h-m   P-1 
_symmetry_int_tables_number      ? 
_chemical_absolute_configuration ? 
  
